# Supplementary material
Source: PubMed Central journal article supplement (PMC535678)
Supplement: nar_32_21_6292__3.pdf [file nar_32_21_6292__3.pdf]

**Supplementary Table S1.** List of the genes categorized into orthologous group shared among 6 bacilli

| I.D.      | GK gene | position (from) | position (to) | category | product                                                                                                      |
|-----------|---------|-----------------|---------------|----------|--------------------------------------------------------------------------------------------------------------|
| ACHSKI-1  | GK0001  | 88              | 1440          | 3.1      | chromosomal replication initiator protein                                                                    |
| ACHSKI-2  | GK0002  | 1613            | 2749          | 3.1      | DNA-directed DNA polymerase III (EC 2.7.7.7) beta subunit                                                    |
| ACHSKI-3  | GK0003  | 2947            | 3168          | 5        | unknown conserved protein                                                                                    |
| ACHSKI-4  | GK0004  | 3180            | 4298          | 3.3      | DNA replication and repair protein                                                                           |
| ACHSKI-5  | GK0005  | 4351            | 6267          | 3.4      | DNA gyrase subunit B                                                                                         |
| ACHSKI-6  | GK0006  | 6418            | 8874          | 3.4      | DNA gyrase subunit A                                                                                         |
| ACHSKI-7  | GK0009  | 16969           | 18435         | 2.3      | inositol-monophosphate dehydrogenase (EC 1.1.1.205)                                                          |
| ACHSKI-8  | GK0010  | 18540           | 19898         | 1.1      | serine-type D-Ala-D-Ala carboxypeptidase (EC 3.4.16.4)                                                       |
| ACHSKI-9  | GK0011  | 20029           | 20913         | 4.2      | superoxide-inducible protein (protein required for pyridoxine synthesis)                                     |
| ACHSKI-10 | GK0012  | 20938           | 21528         | 2.2      | 2-deoxy-scyllo-inosose synthase 20kDa subunit                                                                |
| ACHSKI-11 | GK0013  | 21813           | 23087         | 3.7.2    | seryl-tRNA synthetase (EC 6.1.1.11)                                                                          |
| ACHSKI-12 | GK0014  | 23309           | 24595         | 1.8      | spore peptidoglycan hydrolase (N-acetylglucosaminidase)                                                      |
| ACHSKI-13 | GK0016  | 26394           | 26891         | 5        | unknown conserved protein                                                                                    |
| ACHSKI-14 | GK0017  | 27312           | 28991         | 3.1      | DNA-directed DNA polymerase III (EC 2.7.7.7) gamma and tau subunits                                          |
| ACHSKI-15 | GK0018  | 29015           | 29341         | 5        | unknown conserved protein                                                                                    |
| ACHSKI-16 | GK0019  | 29351           | 29947         | 3.3      | DNA repair and genetic recombination protein                                                                 |
| ACHSKI-17 | GK0020  | 29959           | 30195         | 5        | unknown conserved protein                                                                                    |
| ACHSKI-18 | GK0021  | 30274           | 30537         | 1.8      | inhibitor of the pro-sigma K processing machinery                                                            |
| ACHSKI-19 | GK0022  | 36442           | 36648         | 5        | unknown conserved protein                                                                                    |
| ACHSKI-20 | GK0023  | 36819           | 38252         | 2.2      | lysine decarboxylase                                                                                         |
| ACHSKI-21 | GK0024  | 38267           | 38911         | 2.3      | thymidylate kinase (EC 2.7.4.9)                                                                              |
| ACHSKI-22 | GK0025  | 38997           | 39983         | 3.1      | DNA-directed DNA polymerase III (EC 2.7.7.7) delta' subunit                                                  |
| ACHSKI-23 | GK0026  | 39998           | 40825         | 1.6      | signal peptidase II                                                                                          |
| ACHSKI-24 | GK0027  | 40877           | 41203         | 5        | unknown conserved protein                                                                                    |
| ACHSKI-25 | GK0028  | 41267           | 42013         | 5        | unknown conserved protein                                                                                    |
| ACHSKI-26 | GK0029  | 42029           | 42940         | 5        | unknown conserved protein                                                                                    |
| ACHSKI-27 | GK0030  | 42957           | 43256         | 3.5.2    | transition state regulator                                                                                   |
| ACHSKI-28 | GK0031  | 43653           | 45605         | 3.7.2    | methionyl-tRNA synthetase (Methionine--tRNA ligase) (EC 6.1.1.10)                                            |
| ACHSKI-29 | GK0032  | 45742           | 46512         | 2.3      | deoxyribonuclease                                                                                            |
| ACHSKI-30 | GK0033  | 46713           | 47918         | 5        | unknown conserved protein                                                                                    |
| ACHSKI-31 | GK0034  | 48191           | 48739         | 5        | unknown conserved protein                                                                                    |
| ACHSKI-32 | GK0035  | 48732           | 49613         | 4.2      | dimethyladenosine transferase (EC 2.1.1.-)                                                                   |
| ACHSKI-33 | GK0036  | 49753           | 50652         | 5        | unknown conserved protein                                                                                    |
| ACHSKI-34 | GK0037  | 50835           | 51092         | 4.6      | veg protein                                                                                                  |
| ACHSKI-35 | GK0038  | 51379           | 51537         | 1.8      | small acid-soluble spore protein (minor alpha/beta-type SASP)                                                |
| ACHSKI-36 | GK0039  | 51760           | 52632         | 2.1.1    | 4-diphosphocytidyl-2-C-methyl-D-erythritol kinase (4-(cytidine-5'-diphospho)-2-C-methyl-D-erythritol kinase) |
| ACHSKI-37 | GK0040  | 52688           | 53509         | 3.5.2    | transcriptional repressor of the purine operon                                                               |
| ACHSKI-38 | GK0041  | 53553           | 53927         | 3.7.3    | translation initiation inhibitor                                                                             |
| ACHSKI-39 | GK0042  | 54053           | 54343         | 1.8      | stage V sporulation protein G                                                                                |
| ACHSKI-40 | GK0043  | 54476           | 55852         | 1.1      | UDP-N-acetylglucosamine pyrophosphorylase (EC 2.7.7.23)                                                      |
| ACHSKI-41 | GK0044  | 55913           | 56812         | 2.3      | ribose-phosphate pyrophosphokinase (phosphoribosyl pyrophosphate synthetase)                                 |
| ACHSKI-42 | GK0046  | 57583           | 58143         | 1.8      | stage V sporulation protein C (peptidyl-tRNA hydrolase)                                                      |
| ACHSKI-43 | GK0048  | 58574           | 62107         | 3.5.3    | transcription-repair coupling factor                                                                         |
| ACHSKI-44 | GK0049  | 62316           | 62852         | 3.5.2    | stage V sporulation protein T (transcriptional regulator)                                                    |
| ACHSKI-45 | GK0050  | 63128           | 64678         | 1.2      | amino acid transporter                                                                                       |
| ACHSKI-46 | GK0051  | 64685           | 66145         | 5        | unknown conserved protein                                                                                    |
| ACHSKI-47 | GK0052  | 66159           | 66440         | 5        | unknown conserved protein                                                                                    |
| ACHSKI-48 | GK0053  | 66542           | 66868         | 5        | unknown conserved protein                                                                                    |
| ACHSKI-49 | GK0054  | 66865           | 67497         | 5        | unknown conserved protein                                                                                    |
| ACHSKI-50 | GK0055  | 67514           | 67885         | 1.7      | cell-division initiation protein                                                                             |
| ACHSKI-51 | GK0056  | 68004           | 68402         | 2.3      | polyribonucleotide nucleotidyltransferase                                                                    |

|            |        |        |        |       |                                                                                                                                        |
|------------|--------|--------|--------|-------|----------------------------------------------------------------------------------------------------------------------------------------|
| ACHSKI-52  | GK0057 | 68934  | 71414  | 1.8   | stage II sporulation protein E (serine phosphatase)                                                                                    |
| ACHSKI-53  | GK0060 | 73226  | 74620  | 5     | unknown conserved protein                                                                                                              |
| ACHSKI-54  | GK0061 | 74634  | 75215  | 2.3   | hypoxanthine-guanine phosphoribosyltransferase (EC 2.4.2.8)                                                                            |
| ACHSKI-55  | GK0062 | 75273  | 77171  | 1.7   | cell-division protein and general stress protein (class III heat-shock)                                                                |
| ACHSKI-56  | GK0063 | 77299  | 78075  | 5     | unknown conserved protein                                                                                                              |
| ACHSKI-57  | GK0064 | 78084  | 78974  | 4.1   | chaperonin (heat shock protein 33) (HSP33)                                                                                             |
| ACHSKI-58  | GK0065 | 79061  | 79987  | 2.2   | cysteine synthase (O-acetyl-L-serine sulphydrylase) (EC 4.2.99.8)                                                                      |
| ACHSKI-59  | GK0067 | 81538  | 82104  | 2.5   | para-aminobenzoate synthases component II (EC 4.1.3.-)                                                                                 |
| ACHSKI-60  | GK0069 | 82985  | 83836  | 2.5   | dihydropteroate synthase (EC 2.5.1.15)                                                                                                 |
| ACHSKI-61  | GK0070 | 83844  | 84188  | 2.5   | dihydroneopterin aldolase (EC 4.1.2.25)                                                                                                |
| ACHSKI-62  | GK0071 | 84189  | 84716  | 2.5   | 7,8-dihydro-6-hydroxymethylpterin pyrophosphokinase (2-amino-4-hydroxy-6-hydroxymethyldihydropteridine pyrophosphokinase) (EC 2.7.6.3) |
| ACHSKI-63  | GK0074 | 85998  | 87482  | 3.7.2 | lysyl-tRNA synthetase (lysine--tRNA ligase) (EC 6.1.1.6)                                                                               |
| ACHSKI-64  | GK0075 | 95070  | 95531  | 3.5.2 | transcriptional regulator                                                                                                              |
| ACHSKI-65  | GK0076 | 95547  | 96095  | 5     | unknown conserved protein                                                                                                              |
| ACHSKI-66  | GK0077 | 96101  | 97192  | 2.2   | creatine kinase (EC 2.7.3.2)                                                                                                           |
| ACHSKI-67  | GK0078 | 97189  | 99621  | 4.1   | ATP-dependent Clp protease (ATPase subunit)                                                                                            |
| ACHSKI-68  | GK0079 | 99699  | 101072 | 3.2   | DNA repair protein                                                                                                                     |
| ACHSKI-69  | GK0080 | 101381 | 102475 | 5     | unknown conserved protein                                                                                                              |
| ACHSKI-70  | GK0083 | 103876 | 105348 | 3.7.2 | glutamyl-tRNA synthetase (glutamate--tRNA ligase) (EC 6.1.1.17)                                                                        |
| ACHSKI-71  | GK0084 | 105717 | 106391 | 2.2   | serine O-acetyltransferase (EC 2.3.1.30)                                                                                               |
| ACHSKI-72  | GK0085 | 106369 | 107769 | 3.7.2 | cysteinyl-tRNA synthetase (EC 6.1.1.16)                                                                                                |
| ACHSKI-73  | GK0086 | 107779 | 108201 | 5     | unknown conserved protein                                                                                                              |
| ACHSKI-74  | GK0087 | 108201 | 108938 | 3.6   | tRNA/tRNA methyltransferase                                                                                                            |
| ACHSKI-75  | GK0088 | 108942 | 109454 | 5     | unknown conserved protein                                                                                                              |
| ACHSKI-76  | GK0089 | 109524 | 110174 | 3.5.1 | DNA-directed RNA polymerase sigma-H factor (sigma-30)                                                                                  |
| ACHSKI-77  | GK0091 | 110454 | 110639 | 1.6   | preprotein translocase subunit                                                                                                         |
| ACHSKI-78  | GK0092 | 110752 | 111285 | 3.5.4 | transcription antitermination factor                                                                                                   |
| ACHSKI-79  | GK0093 | 111520 | 111945 | 3.7.1 | 50S ribosomal protein L11 (BL11)                                                                                                       |
| ACHSKI-80  | GK0094 | 112126 | 112827 | 3.7.1 | 50S ribosomal protein L1                                                                                                               |
| ACHSKI-81  | GK0095 | 113086 | 113586 | 3.7.1 | 50S ribosomal protein L10                                                                                                              |
| ACHSKI-82  | GK0096 | 113638 | 114009 | 3.7.1 | 50S ribosomal protein L7/L12 (BL13)                                                                                                    |
| ACHSKI-83  | GK0097 | 113939 | 114724 | 5     | unknown conserved protein                                                                                                              |
| ACHSKI-84  | GK0098 | 115138 | 118710 | 3.5.3 | DNA-directed RNA polymerase beta subunit                                                                                               |
| ACHSKI-85  | GK0099 | 118803 | 122402 | 3.5.3 | DNA-directed RNA polymerase beta' subunit                                                                                              |
| ACHSKI-86  | GK0101 | 122882 | 123304 | 3.7.1 | 30S ribosomal protein S12                                                                                                              |
| ACHSKI-87  | GK0102 | 123344 | 123814 | 3.7.1 | 30S ribosomal protein S7 (BS7)                                                                                                         |
| ACHSKI-88  | GK0103 | 123995 | 126073 | 3.7.4 | translation elongation factor G (EF-G)                                                                                                 |
| ACHSKI-89  | GK0104 | 126202 | 127389 | 3.7.4 | translation elongation factor Tu (EF-Tu)                                                                                               |
| ACHSKI-90  | GK0105 | 127686 | 127994 | 3.7.1 | 30S ribosomal protein S10 (BS13)                                                                                                       |
| ACHSKI-91  | GK0106 | 128015 | 128656 | 3.7.1 | 50S ribosomal protein L3                                                                                                               |
| ACHSKI-92  | GK0107 | 128686 | 129309 | 3.7.1 | 50S ribosomal protein L4                                                                                                               |
| ACHSKI-93  | GK0108 | 129309 | 129596 | 3.7.1 | 50S ribosomal protein L23                                                                                                              |
| ACHSKI-94  | GK0109 | 129624 | 130454 | 3.7.1 | 50S ribosomal protein L2                                                                                                               |
| ACHSKI-95  | GK0110 | 130488 | 130766 | 3.7.1 | 30S ribosomal protein S19 (BS19)                                                                                                       |
| ACHSKI-96  | GK0111 | 130785 | 131126 | 3.7.1 | 50S ribosomal protein L22                                                                                                              |
| ACHSKI-97  | GK0112 | 131130 | 131786 | 3.7.1 | 30S ribosomal protein S3 (BS2)                                                                                                         |
| ACHSKI-98  | GK0113 | 131789 | 132214 | 3.7.1 | 50S ribosomal protein L16                                                                                                              |
| ACHSKI-99  | GK0114 | 132214 | 132414 | 3.7.1 | 50S ribosomal protein L29                                                                                                              |
| ACHSKI-100 | GK0115 | 132439 | 132702 | 3.7.1 | 30S ribosomal protein S17                                                                                                              |
| ACHSKI-101 | GK0116 | 132752 | 133120 | 3.7.1 | 50S ribosomal protein L14                                                                                                              |
| ACHSKI-102 | GK0117 | 133157 | 133468 | 3.7.1 | 50S ribosomal protein L24                                                                                                              |
| ACHSKI-103 | GK0118 | 133496 | 134035 | 3.7.1 | 50S ribosomal protein L5                                                                                                               |
| ACHSKI-104 | GK0119 | 134065 | 134250 | 3.7.1 | 30S ribosomal protein S14                                                                                                              |

|            |        |        |        |       |                                                                                                                    |
|------------|--------|--------|--------|-------|--------------------------------------------------------------------------------------------------------------------|
| ACHSKI-105 | GK0120 | 134290 | 134682 | 3.7.1 | 30S ribosomal protein S8                                                                                           |
| ACHSKI-106 | GK0121 | 134715 | 135251 | 3.7.1 | 50S ribosomal protein L6                                                                                           |
| ACHSKI-107 | GK0122 | 135285 | 135647 | 3.7.1 | 50S ribosomal protein L18                                                                                          |
| ACHSKI-108 | GK0123 | 135667 | 136167 | 3.7.1 | 30S ribosomal protein S5                                                                                           |
| ACHSKI-109 | GK0124 | 136181 | 136369 | 3.7.1 | 50S ribosomal protein L30                                                                                          |
| ACHSKI-110 | GK0125 | 136394 | 136834 | 3.7.1 | 50S ribosomal protein L15                                                                                          |
| ACHSKI-111 | GK0126 | 136834 | 138126 | 1.6   | preprotein translocase subunit                                                                                     |
| ACHSKI-112 | GK0127 | 138170 | 138823 | 2.3   | adenylate kinase (ATP-AMP transphosphorylase)                                                                      |
| ACHSKI-113 | GK0129 | 139683 | 139901 | 3.7.3 | translation initiation factor IF-I                                                                                 |
| ACHSKI-114 | GK0130 | 139938 | 140051 | 3.7.1 | 50S ribosomal protein L36                                                                                          |
| ACHSKI-115 | GK0131 | 140072 | 140437 | 3.7.1 | 30S ribosomal protein S13                                                                                          |
| ACHSKI-116 | GK0132 | 140463 | 140852 | 3.7.1 | 30S ribosomal protein S11                                                                                          |
| ACHSKI-117 | GK0133 | 141003 | 141947 | 3.5.3 | DNA-directed RNA polymerase alpha subunit (EC 2.7.7.6)                                                             |
| ACHSKI-118 | GK0134 | 142048 | 142410 | 3.7.1 | 50S ribosomal protein L17                                                                                          |
| ACHSKI-119 | GK0135 | 142528 | 143367 | 1.2   | ABC transporter (ATP-binding protein)                                                                              |
| ACHSKI-120 | GK0136 | 143343 | 144215 | 1.2   | ABC transporter (ATP-binding protein)                                                                              |
| ACHSKI-121 | GK0137 | 144208 | 145005 | 1.2   | cobalt transporter                                                                                                 |
| ACHSKI-122 | GK0139 | 145974 | 146411 | 3.7.1 | 50S ribosomal protein L13                                                                                          |
| ACHSKI-123 | GK0140 | 146432 | 146824 | 3.7.1 | 30S ribosomal protein S9                                                                                           |
| ACHSKI-124 | GK0142 | 147451 | 148167 | 1.1   | germination-specific N-acetylmuramoyl-L-alanine amidase (cell wall hydrolase) (autolysin) (EC 3.5.1.28)            |
| ACHSKI-125 | GK0143 | 148362 | 149378 | 1.7   | ATPase involved in chromosome partitioning                                                                         |
| ACHSKI-126 | GK0144 | 149464 | 149931 | 1.9   | spore germination protein precursor (C-term divided by IS)                                                         |
| ACHSKI-127 | GK0147 | 152132 | 152731 | 1.8   | KinB signaling pathway activation protein                                                                          |
| ACHSKI-128 | GK0148 | 152867 | 153622 | 2.1.1 | polysaccharide deacetylase                                                                                         |
| ACHSKI-129 | GK0150 | 162033 | 162596 | 3.5.1 | DNA-directed RNA polymerase ECF-type sigma factor (sigma-W)                                                        |
| ACHSKI-130 | GK0152 | 163295 | 164116 | 5     | unknown conserved protein                                                                                          |
| ACHSKI-131 | GK0153 | 164109 | 165347 | 5     | unknown conserved protein                                                                                          |
| ACHSKI-132 | GK0154 | 165375 | 166724 | 2.1.2 | phosphoglucomutase (glycolysis)                                                                                    |
| ACHSKI-133 | GK0155 | 167275 | 169077 | 2.2   | L-glutamine-D-fructose-6-phosphate amidotransferase (EC 2.6.1.16)                                                  |
| ACHSKI-134 | GK0182 | 191206 | 192108 | 5     | unknown conserved protein                                                                                          |
| ACHSKI-135 | GK0186 | 195130 | 196542 | 1.2   | amino acid permease                                                                                                |
| ACHSKI-136 | GK0187 | 196638 | 198185 | 2.2   | aldehyde dehydrogenase                                                                                             |
| ACHSKI-137 | GK0188 | 198302 | 199501 | 2.2   | ornithine aminotransferase (EC 2.6.1.13)                                                                           |
| ACHSKI-138 | GK0189 | 199459 | 200766 | 2.2   | NAD-specific glutamate dehydrogenase (NAD-GDH) (EC 1.4.1.2)                                                        |
| ACHSKI-139 | GK0199 | 209987 | 211528 | 4.1   | aldehyde dehydrogenase                                                                                             |
| ACHSKI-140 | GK0202 | 213404 | 214111 | 3.9   | protein-disulfide isomerase                                                                                        |
| ACHSKI-141 | GK0203 | 214222 | 214686 | 5     | unknown conserved protein                                                                                          |
| ACHSKI-142 | GK0208 | 217071 | 218150 | 1.2   | ABC transporter (ATP-binding protein)                                                                              |
| ACHSKI-143 | GK0212 | 222927 | 224264 | 1.2   | K+ uptake transporter (Trk family)                                                                                 |
| ACHSKI-144 | GK0214 | 226590 | 227228 | 5     | unknown conserved protein                                                                                          |
| ACHSKI-145 | GK0218 | 230190 | 231011 | 4.2   | bacitracin resistance protein                                                                                      |
| ACHSKI-146 | GK0219 | 231312 | 232385 | 1.1   | UDP-N-acetylglucosamine-N-acetylmuramyl-(pentapeptide) pyrophosphoryl N-acetylglucosamine transferase (EC 2.4.1.-) |
| ACHSKI-147 | GK0223 | 235403 | 236506 | 1.1   | D-alanine-D-alanine ligase (EC 6.3.2.4)                                                                            |
| ACHSKI-148 | GK0224 | 236513 | 237889 | 1.1   | UDP-N-acetylmuramoylalanyl-D-glutamyl-2,6-diaminopimelate-D-alanyl-D-alanyl ligase (EC 6.3.2.15)                   |
| ACHSKI-149 | GK0226 | 238745 | 240148 | 3.6   | ATP-dependent RNA helicase                                                                                         |
| ACHSKI-150 | GK0227 | 240160 | 240777 | 5     | unknown conserved protein                                                                                          |
| ACHSKI-151 | GK0228 | 240891 | 241280 | 2.4   | holo-[acyl-carrier protein] synthase                                                                               |
| ACHSKI-152 | GK0229 | 241360 | 242316 | 5     | unknown conserved protein                                                                                          |
| ACHSKI-153 | GK0232 | 243902 | 244183 | 5     | unknown conserved protein                                                                                          |
| ACHSKI-154 | GK0233 | 244188 | 244538 | 5     | unknown conserved protein                                                                                          |
| ACHSKI-155 | GK0234 | 244804 | 246969 | 5     | unknown conserved protein                                                                                          |
| ACHSKI-156 | GK0235 | 247191 | 247640 | 5     | unknown conserved protein                                                                                          |
| ACHSKI-157 | GK0236 | 255641 | 256099 | 5     | unknown conserved protein                                                                                          |

|            |        |        |        |       |                                                                                                                          |
|------------|--------|--------|--------|-------|--------------------------------------------------------------------------------------------------------------------------|
| ACHSKI-158 | GK0237 | 256096 | 256836 | 3.8   | glycoprotein endopeptidase                                                                                               |
| ACHSKI-159 | GK0238 | 256796 | 257248 | 3.8   | ribosomal-protein (S18)-alanine acetyltransferase                                                                        |
| ACHSKI-160 | GK0239 | 257230 | 258258 | 3.8   | glycoprotein endopeptidase                                                                                               |
| ACHSKI-161 | GK0240 | 258581 | 260506 | 1.2   | ABC transporter (ATP-binding protein)                                                                                    |
| ACHSKI-162 | GK0242 | 261108 | 261749 | 5     | unknown conserved protein                                                                                                |
| ACHSKI-163 | GK0245 | 262866 | 263042 | 5     | unknown conserved protein                                                                                                |
| ACHSKI-164 | GK0246 | 263042 | 263776 | 5     | unknown conserved protein                                                                                                |
| ACHSKI-165 | GK0248 | 264136 | 264417 | 3.9   | chaperonin (GroES protein)                                                                                               |
| ACHSKI-166 | GK0249 | 264522 | 266138 | 3.9   | chaperonin (GroEL protein)                                                                                               |
| ACHSKI-167 | GK0250 | 266579 | 267949 | 2.1.3 | fumarate hydratase (EC 4.2.1.2)                                                                                          |
| ACHSKI-168 | GK0251 | 268139 | 269095 | 2.1.1 | methanol dehydrogenase regulatory protein (MoxR protein)                                                                 |
| ACHSKI-169 | GK0252 | 269098 | 270273 | 5     | unknown conserved protein                                                                                                |
| ACHSKI-170 | GK0253 | 270270 | 272432 | 5     | unknown conserved protein                                                                                                |
| ACHSKI-171 | GK0254 | 272636 | 274168 | 2.3   | GMP synthetase (glutamine amidotransferase) (EC 6.3.5.2)                                                                 |
| ACHSKI-172 | GK0255 | 274459 | 275784 | 5     | unknown conserved protein                                                                                                |
| ACHSKI-173 | GK0257 | 282792 | 283280 | 2.3   | phosphoribosylaminoimidazole carboxylase I (EC 4.1.1.21) catalytic chain                                                 |
| ACHSKI-174 | GK0258 | 283273 | 284421 | 2.3   | phosphoribosylaminoimidazole carboxylase II (EC 4.1.1.21) carbon dioxide-fixation chain                                  |
| ACHSKI-175 | GK0259 | 284418 | 285713 | 2.3   | adenylosuccinate lyase (glutamyl-tRNA synthetase regulatory factor) (EC 4.3.2.2)                                         |
| ACHSKI-176 | GK0260 | 285789 | 286517 | 2.3   | phosphoribosylaminoimidazole succinocarboxamide synthetase                                                               |
| ACHSKI-177 | GK0261 | 286505 | 286759 | 2.3   | phosphoribosylformylglycinamide (FGAM) synthase (EC 6.3.5.3) PurS component                                              |
| ACHSKI-178 | GK0262 | 286756 | 287442 | 2.3   | phosphoribosylformylglycinamide (FGAM) synthase (EC 6.3.5.3) component I (glutamine amidotransferase domain)             |
| ACHSKI-179 | GK0263 | 287426 | 289654 | 2.3   | phosphoribosylformylglycinamide (FGAM) synthase (EC 6.3.5.3) component II (synthetase domain)                            |
| ACHSKI-180 | GK0264 | 289630 | 291042 | 2.3   | phosphoribosylpyrophosphate amidotransferase (EC 2.4.2.14)                                                               |
| ACHSKI-181 | GK0265 | 291166 | 292206 | 2.3   | phosphoribosylaminoimidazole synthetase (phosphoribosylformylglycinamide cyclo-ligase) (EC 6.3.3.1)                      |
| ACHSKI-182 | GK0266 | 292203 | 292835 | 2.3   | phosphoribosylglycinamide formyltransferase (EC 2.1.2.2)                                                                 |
| ACHSKI-183 | GK0267 | 292798 | 294336 | 2.3   | phosphoribosylaminoimidazolecarboxamide formyltransferase; IMP cyclohydrolase (bifunctional purine biosynthesis protein) |
| ACHSKI-184 | GK0268 | 294360 | 295652 | 2.3   | phosphoribosylglycinamide synthetase (glycinamide ribonucleotide synthetase) (phosphoribosylglycinamide synthetase)      |
| ACHSKI-185 | GK0271 | 296304 | 298049 | 2.3   | adenine deaminase                                                                                                        |
| ACHSKI-186 | GK0274 | 299625 | 300344 | 5     | unknown conserved protein                                                                                                |
| ACHSKI-187 | GK0275 | 300373 | 302547 | 3.1   | ATP-dependent DNA helicase                                                                                               |
| ACHSKI-188 | GK0276 | 302568 | 304580 | 3.1   | DNA ligase (polydeoxyribonucleotide synthase [NAD+]) (EC 6.5.1.2.)                                                       |
| ACHSKI-189 | GK0277 | 304577 | 305800 | 5     | unknown conserved protein                                                                                                |
| ACHSKI-190 | GK0278 | 305976 | 306533 | 5     | unknown conserved protein                                                                                                |
| ACHSKI-191 | GK0281 | 308438 | 308728 | 3.7.2 | aspartyl/glutamyl-tRNA(Asn/Gln) amidotransferase (EC 6.3.5.-) subunit C (Glu-ADT subunit C)                              |
| ACHSKI-192 | GK0282 | 308741 | 310198 | 3.7.2 | aspartyl/glutamyl-tRNA(Asn/Gln) amidotransferase (EC 6.3.5.-) subunit A (Glu-ADT subunit A)                              |
| ACHSKI-193 | GK0283 | 310212 | 311642 | 3.7.2 | aspartyl/glutamyl-tRNA(Asn/Gln) amidotransferase (EC 6.3.5.-) subunit B (Asp/Glu-ADT subunit B)                          |
| ACHSKI-194 | GK0324 | 357073 | 358305 | 1.2   | drug-efflux transporter                                                                                                  |
| ACHSKI-195 | GK0325 | 358505 | 359158 | 5     | unknown conserved protein                                                                                                |
| ACHSKI-196 | GK0340 | 372826 | 374343 | 4.6   | epidermal surface antigen                                                                                                |
| ACHSKI-197 | GK0341 | 374486 | 375406 | 5     | unknown conserved protein                                                                                                |
| ACHSKI-198 | GK0342 | 375484 | 376857 | 3.6   | RNA methyltransferase                                                                                                    |
| ACHSKI-199 | GK0352 | 390071 | 392209 | 1.2   | cadmium transporting ATPase                                                                                              |
| ACHSKI-200 | GK0367 | 407719 | 409242 | 5     | unknown conserved protein                                                                                                |
| ACHSKI-201 | GK0376 | 421731 | 422906 | 1.2   | multidrug-efflux transporter                                                                                             |
| ACHSKI-202 | GK0386 | 432162 | 432860 | 5     | unknown conserved protein                                                                                                |
| ACHSKI-203 | GK0393 | 438585 | 439307 | 5     | unknown conserved protein                                                                                                |
| ACHSKI-204 | GK0394 | 439304 | 440734 | 5     | unknown conserved protein                                                                                                |
| ACHSKI-205 | GK0395 | 440750 | 441469 | 2.1.1 | glycolate oxidase                                                                                                        |
| ACHSKI-206 | GK0396 | 441586 | 442311 | 3.5.2 | transcriptional regulator (GntR family)                                                                                  |
| ACHSKI-207 | GK0398 | 442773 | 444446 | 1.2   | L-lactate permease                                                                                                       |
| ACHSKI-208 | GK0400 | 446057 | 446509 | 5     | unknown conserved protein                                                                                                |
| ACHSKI-209 | GK0402 | 449312 | 449683 | 5     | unknown conserved protein                                                                                                |
| ACHSKI-210 | GK0404 | 450659 | 451300 | 2.5   | siroheme synthase                                                                                                        |

|            |        |        |        |       |                                                                        |
|------------|--------|--------|--------|-------|------------------------------------------------------------------------|
| ACHSKI-211 | GK0407 | 453580 | 454233 | 5     | unknown conserved protein                                              |
| ACHSKI-212 | GK0408 | 454247 | 454594 | 5     | unknown conserved protein                                              |
| ACHSKI-213 | GK0412 | 456063 | 456809 | 5     | unknown conserved protein                                              |
| ACHSKI-214 | GK0414 | 457745 | 458356 | 2.2   | adenylylsulfate kinase (EC 2.7.1.25)                                   |
| ACHSKI-215 | GK0415 | 458369 | 459529 | 2.7   | sulfate adenylyltransferase (EC 2.7.7.4)                               |
| ACHSKI-216 | GK0416 | 459803 | 460510 | 2.2   | phosphoadenylyl-sulfate reductase (thioredoxin-dependent) (EC 1.8.4.8) |
| ACHSKI-217 | GK0418 | 460870 | 461094 | 5     | unknown conserved protein                                              |
| ACHSKI-218 | GK0419 | 461432 | 461932 | 3.8   | protein-tyrosine phosphatase                                           |
| ACHSKI-219 | GK0420 | 461984 | 462817 | 1.2   | transporter                                                            |
| ACHSKI-220 | GK0423 | 464714 | 465766 | 1.2   | H <sup>+</sup> /Ca <sup>2+</sup> exchanger                             |
| ACHSKI-221 | GK0424 | 465919 | 466707 | 5     | unknown conserved protein                                              |
| ACHSKI-222 | GK0425 | 466737 | 467861 | 5     | unknown conserved protein                                              |
| ACHSKI-223 | GK0427 | 469797 | 470612 | 2.1.1 | modulation protein                                                     |
| ACHSKI-224 | GK0432 | 474774 | 475505 | 5     | unknown conserved protein                                              |
| ACHSKI-225 | GK0433 | 475502 | 476536 | 1.3   | two-component sensor histidine kinase                                  |
| ACHSKI-226 | GK0434 | 476529 | 477161 | 3.5.2 | two-component response regulator                                       |
| ACHSKI-227 | GK0438 | 479971 | 480738 | 3.5.2 | transcriptional activator                                              |
| ACHSKI-228 | GK0451 | 493741 | 494658 | 1.7   | cell-division inhibitor                                                |
| ACHSKI-229 | GK0452 | 494752 | 495561 | 5     | unknown conserved protein                                              |
| ACHSKI-230 | GK0453 | 495730 | 496071 | 5     | unknown conserved protein                                              |
| ACHSKI-231 | GK0456 | 496645 | 497628 | 5     | unknown conserved protein                                              |
| ACHSKI-232 | GK0463 | 504639 | 505739 | 3.2   | adenine glycosylase                                                    |
| ACHSKI-233 | GK0464 | 505736 | 505960 | 5     | unknown conserved protein                                              |
| ACHSKI-234 | GK0468 | 507592 | 508125 | 5     | unknown conserved protein                                              |
| ACHSKI-235 | GK0469 | 508463 | 509362 | 1.2   | ABC transporter (permease) dipeptide                                   |
| ACHSKI-236 | GK0470 | 509623 | 510456 | 5     | unknown conserved protein                                              |
| ACHSKI-237 | GK0471 | 510585 | 511871 | 2.5   | glutamate-1-semialdehyde 2,1-aminomutase 2 (GSA) (EC 5.4.3.8)          |
| ACHSKI-238 | GK0475 | 514988 | 515941 | 1.4   | L-lactate dehydrogenase (EC 1.1.1.27)                                  |
| ACHSKI-239 | GK0477 | 516583 | 517059 | 4.2   | bacterioferritin comigratory protein                                   |
| ACHSKI-240 | GK0478 | 517290 | 517742 | 3.5.2 | transcriptional regulator (Fur family)                                 |
| ACHSKI-241 | GK0479 | 517767 | 518120 | 5     | unknown conserved protein                                              |
| ACHSKI-242 | GK0482 | 529468 | 530610 | 5     | unknown conserved protein                                              |
| ACHSKI-243 | GK0483 | 530672 | 531535 | 5     | unknown conserved protein                                              |
| ACHSKI-244 | GK0484 | 531556 | 532029 | 3.6   | rRNA methylase                                                         |
| ACHSKI-245 | GK0486 | 532355 | 534250 | 3.8   | serine protein kinase (EC 2.7.1.37)                                    |
| ACHSKI-246 | GK0487 | 534559 | 535743 | 5     | unknown conserved protein                                              |
| ACHSKI-247 | GK0539 | 562303 | 567996 | 4.4   | bacteriophage-related protein                                          |
| ACHSKI-248 | GK0559 | 582498 | 584075 | 1.3   | two-component sensor histidine kinase                                  |
| ACHSKI-249 | GK0561 | 585409 | 586851 | 1.2   | C <sub>4</sub> -dicarboxylate transporter (permease)                   |
| ACHSKI-250 | GK0562 | 587134 | 587961 | 2.1.1 | plant-metabolite dehydrogenase                                         |
| ACHSKI-251 | GK0563 | 588109 | 588801 | 5     | unknown conserved protein                                              |
| ACHSKI-252 | GK0567 | 592090 | 592563 | 5     | unknown conserved protein                                              |
| ACHSKI-253 | GK0568 | 592560 | 592997 | 3.9   | protein-disulfide oxidoreductase                                       |
| ACHSKI-254 | GK0570 | 593734 | 595491 | 2.1.1 | phosphomannomutase (EC 5.4.2.8)                                        |
| ACHSKI-255 | GK0574 | 597020 | 597817 | 1.8   | stage V sporulation protein R (involved in spore cortex synthesis)     |
| ACHSKI-256 | GK0585 | 609473 | 611611 | 1.2   | cadmium-transporting ATPase                                            |
| ACHSKI-257 | GK0589 | 614664 | 615086 | 4.2   | arsenate reductase                                                     |
| ACHSKI-258 | GK0603 | 628278 | 628868 | 1.8   | stage V sporulation protein R                                          |
| ACHSKI-259 | GK0604 | 629154 | 630500 | 1.4   | cytochrome bd-type ubiquinol oxidase subunit I                         |
| ACHSKI-260 | GK0605 | 630497 | 631525 | 1.4   | cytochrome bd-type ubiquinol oxidase subunit II                        |
| ACHSKI-261 | GK0608 | 632275 | 632595 | 3.9   | chaperone                                                              |
| ACHSKI-262 | GK0612 | 634701 | 636776 | 4.1   | carbon starvation protein                                              |
| ACHSKI-263 | GK0614 | 637124 | 638050 | 2.5   | thiamine biosynthesis protein                                          |

|            |        |        |        |       |                                                                          |
|------------|--------|--------|--------|-------|--------------------------------------------------------------------------|
| ACHSKI-264 | GK0615 | 638190 | 639857 | 2.1.1 | exo-alpha-1,4-glucoSIDase (EC 3.2.1.20)                                  |
| ACHSKI-265 | GK0616 | 639913 | 640449 | 5     | unknown conserved protein                                                |
| ACHSKI-266 | GK0617 | 640667 | 641872 | 1.2   | antibiotic resistance protein (antibiotic efflux protein)                |
| ACHSKI-267 | GK0629 | 652611 | 652823 | 1.8   | small acid-soluble spore protein                                         |
| ACHSKI-268 | GK0631 | 653438 | 654550 | 1.2   | ABC transporter (ATP-binding protein) sugar                              |
| ACHSKI-269 | GK0635 | 656474 | 657640 | 5     | unknown conserved protein                                                |
| ACHSKI-270 | GK0636 | 657634 | 658983 | 5     | unknown conserved protein                                                |
| ACHSKI-271 | GK0638 | 660053 | 661129 | 5     | unknown conserved protein                                                |
| ACHSKI-272 | GK0640 | 662461 | 662820 | 5     | unknown conserved protein                                                |
| ACHSKI-273 | GK0644 | 665910 | 666809 | 1.2   | ABC transporter (ATP-binding protein) (Na <sup>+</sup> exclusion)        |
| ACHSKI-274 | GK0645 | 666802 | 668031 | 1.2   | ABC transporter (permease) (Na <sup>+</sup> exclusion)                   |
| ACHSKI-275 | GK0646 | 668150 | 669127 | 5     | unknown conserved protein                                                |
| ACHSKI-276 | GK0648 | 669392 | 669580 | 5     | unknown conserved protein                                                |
| ACHSKI-277 | GK0656 | 673645 | 674490 | 1.6   | post-translocation molecular chaperone                                   |
| ACHSKI-278 | GK0657 | 674568 | 674999 | 4.1   | Hit-like protein (cell-cycle regulation histidine triad)                 |
| ACHSKI-279 | GK0658 | 675456 | 676193 | 1.2   | ABC transporter (ATP-binding protein)                                    |
| ACHSKI-280 | GK0660 | 677554 | 678954 | 5     | unknown conserved protein                                                |
| ACHSKI-281 | GK0661 | 679153 | 680196 | 2.5   | uroporphyrinogen decarboxylase (EC 4.1.1.37)                             |
| ACHSKI-282 | GK0663 | 681156 | 682595 | 2.5   | protoporphyrinogen IX /coproporphyrinogen III oxidase                    |
| ACHSKI-283 | GK0667 | 684798 | 685532 | 5     | unknown conserved protein                                                |
| ACHSKI-284 | GK0672 | 690289 | 691152 | 2.2   | D-alanine aminotransferase (EC 2.6.1.21)                                 |
| ACHSKI-285 | GK0673 | 691340 | 692056 | 1.2   | branched-chain amino acid transporter                                    |
| ACHSKI-286 | GK0680 | 696188 | 696736 | 1.6   | signal peptidase I (SPase I) (EC 3.4.21.89)                              |
| ACHSKI-287 | GK0681 | 696991 | 700494 | 3.3   | ATP-dependent deoxyribonuclease subunit B                                |
| ACHSKI-288 | GK0682 | 700495 | 704223 | 3.3   | ATP-dependent deoxyribonuclease subunit A                                |
| ACHSKI-289 | GK0696 | 715211 | 716113 | 5     | unknown conserved protein                                                |
| ACHSKI-290 | GK0697 | 716258 | 716611 | 5     | unknown conserved protein                                                |
| ACHSKI-291 | GK0700 | 720525 | 722372 | 2.2   | asparagine synthetase (glutamine-hydrolyzing) (EC 6.3.5.4)               |
| ACHSKI-292 | GK0703 | 724811 | 726577 | 2.1.1 | alpha-cyclodextrinase                                                    |
| ACHSKI-293 | GK0705 | 728167 | 729447 | 1.2   | maltose/maltodextrin transport system (permease)                         |
| ACHSKI-294 | GK0706 | 729447 | 730289 | 1.2   | maltose/maltodextrin transport system (permease)                         |
| ACHSKI-295 | GK0708 | 731915 | 732934 | 3.5.2 | transcriptional regulator involved in carbon catabolite control          |
| ACHSKI-296 | GK0713 | 738736 | 739599 | 2.1.1 | oxidoreductase (short-chain dehydrogenase:reductase family)              |
| ACHSKI-297 | GK0716 | 740061 | 743471 | 2.5   | 5-methyltetrahydrofolate--homocysteine S-methyltransferase (EC 2.1.1.13) |
| ACHSKI-298 | GK0717 | 743464 | 745311 | 5     | unknown conserved protein                                                |
| ACHSKI-299 | GK0727 | 753849 | 754997 | 4.1   | 1,3 propanediol dehydrogenase (EC 1.1.1.202)                             |
| ACHSKI-300 | GK0731 | 759990 | 761000 | 2.1.1 | alcohol dehydrogenase (EC 1.1.1.1)                                       |
| ACHSKI-301 | GK0738 | 764694 | 766073 | 3.5.2 | transcriptional regulator (GntR family)                                  |
| ACHSKI-302 | GK0747 | 772471 | 773277 | 5     | unknown conserved protein                                                |
| ACHSKI-303 | GK0750 | 774725 | 776851 | 1.2   | cation-transporting ATPase                                               |
| ACHSKI-304 | GK0753 | 778357 | 778659 | 5     | unknown conserved protein                                                |
| ACHSKI-305 | GK0767 | 790787 | 791851 | 1.8   | nitrite reductase (EC 1.7.99.3)                                          |
| ACHSKI-306 | GK0791 | 819343 | 820575 | 2.2   | arginine biosynthesis bifunctional enzyme                                |
| ACHSKI-307 | GK0792 | 820588 | 821364 | 2.2   | acetylglutamate kinase (EC 2.7.2.8)                                      |
| ACHSKI-308 | GK0793 | 821361 | 822521 | 2.2   | N-acetylmethionine aminotransferase (EC 2.6.1.11)                        |
| ACHSKI-309 | GK0796 | 826792 | 827730 | 2.2   | ornithine carbamoyltransferase (EC 2.1.3.3)                              |
| ACHSKI-310 | GK0798 | 827915 | 828094 | 5     | unknown conserved protein                                                |
| ACHSKI-311 | GK0804 | 832788 | 833720 | 2.4   | 3-oxoacyl-[acyl-carrier protein] synthase (EC 2.3.1.41)                  |
| ACHSKI-312 | GK0805 | 833761 | 834999 | 2.4   | 3-oxoacyl-[acyl-carrier protein] synthase (EC 2.3.1.41)                  |
| ACHSKI-313 | GK0808 | 836376 | 837116 | 5     | unknown conserved protein                                                |
| ACHSKI-314 | GK0809 | 837178 | 838164 | 3.7.2 | tryptophan-tRNA synthetase (EC 6.1.1.2)                                  |
| ACHSKI-315 | GK0817 | 845606 | 846004 | 5     | unknown conserved protein                                                |
| ACHSKI-316 | GK0818 | 846054 | 846710 | 5     | unknown conserved protein                                                |

|            |        |         |         |       |                                                                                                      |
|------------|--------|---------|---------|-------|------------------------------------------------------------------------------------------------------|
| ACHSKI-317 | GK0819 | 846924  | 847604  | 1.10  | negative regulator of genetic competence                                                             |
| ACHSKI-318 | GK0820 | 847701  | 849209  | 2.4   | cardiolipin synthetase (EC 2.7.8.-)                                                                  |
| ACHSKI-319 | GK0821 | 849398  | 850726  | 5     | unknown conserved protein                                                                            |
| ACHSKI-320 | GK0822 | 850732  | 852549  | 2.2   | thimet oligoendopeptidase (EC 3.4.24.15)                                                             |
| ACHSKI-321 | GK0824 | 853186  | 854079  | 5     | unknown conserved protein                                                                            |
| ACHSKI-322 | GK0825 | 854072  | 854485  | 5     | unknown conserved protein                                                                            |
| ACHSKI-323 | GK0826 | 854588  | 855211  | 4.4   | lytic transglycosylase                                                                               |
| ACHSKI-324 | GK0827 | 855208  | 855801  | 5     | unknown conserved protein                                                                            |
| ACHSKI-325 | GK0829 | 856452  | 857090  | 5     | unknown conserved protein                                                                            |
| ACHSKI-326 | GK0830 | 857087  | 857902  | 2.5   | inorganic polyphosphate/ATP-NAD kinase (EC 2.7.1.23)                                                 |
| ACHSKI-327 | GK0832 | 858967  | 859704  | 2.3   | diadenosine tetraphosphatase                                                                         |
| ACHSKI-328 | GK0833 | 859911  | 861086  | 1.7   | stage V sporulation protein E                                                                        |
| ACHSKI-329 | GK0834 | 861285  | 862061  | 2.4   | enoyl-[acyl-carrier-protein] reductase [NADH] (EC 1.3.1.9)                                           |
| ACHSKI-330 | GK0839 | 866821  | 867777  | 2.1.1 | NDP-sugar epimerase                                                                                  |
| ACHSKI-331 | GK0840 | 867774  | 869057  | 2.1.1 | NDP-sugar dehydrogenase                                                                              |
| ACHSKI-332 | GK0857 | 878578  | 879438  | 5     | unknown conserved protein                                                                            |
| ACHSKI-333 | GK0862 | 880786  | 881043  | 5     | unknown conserved protein                                                                            |
| ACHSKI-334 | GK0863 | 881161  | 881595  | 5     | unknown conserved protein                                                                            |
| ACHSKI-335 | GK0864 | 881597  | 882118  | 5     | unknown conserved protein                                                                            |
| ACHSKI-336 | GK0865 | 882217  | 882945  | 5     | unknown conserved protein                                                                            |
| ACHSKI-337 | GK0891 | 914005  | 914919  | 3.5.2 | transcriptional regulator (LysR family)                                                              |
| ACHSKI-338 | GK0900 | 921847  | 922554  | 1.4   | cytochrome c biogenesis protein (holocytochrome-c synthase) (EC 4.4.1.17)                            |
| ACHSKI-339 | GK0901 | 922746  | 923057  | 5     | unknown conserved protein                                                                            |
| ACHSKI-340 | GK0902 | 923075  | 925471  | 1.2   | heavy metal-transporting ATPase                                                                      |
| ACHSKI-341 | GK0903 | 925493  | 925696  | 1.2   | mercuric ion-binding protein                                                                         |
| ACHSKI-342 | GK0904 | 925915  | 927501  | 1.8   | multicopper oxidase                                                                                  |
| ACHSKI-343 | GK0910 | 933792  | 934808  | 1.2   | ABC-transporter (ATP-binding protein)                                                                |
| ACHSKI-344 | GK0911 | 935267  | 937624  | 2.3   | ribonucleoside-diphosphate reductase alpha subunit (EC 1.17.4.1)                                     |
| ACHSKI-345 | GK0912 | 937735  | 938775  | 2.3   | ribonucleoside-diphosphate reductase beta subunit (EC1.17.4.1)                                       |
| ACHSKI-346 | GK0913 | 939236  | 939772  | 5     | unknown conserved protein                                                                            |
| ACHSKI-347 | GK0918 | 942714  | 943628  | 1.1   | UDP-N-acetylenolpyruvoylglucosamine reductase (EC 1.1.1.158)                                         |
| ACHSKI-348 | GK0928 | 951180  | 952715  | 1.2   | sodium:solute symporter                                                                              |
| ACHSKI-349 | GK0930 | 953374  | 954789  | 1.2   | amino acid transporter                                                                               |
| ACHSKI-350 | GK0937 | 958195  | 959439  | 1.2   | multidrug resistance protein                                                                         |
| ACHSKI-351 | GK0944 | 963210  | 965426  | 1.3   | two-component sensor histidine kinase                                                                |
| ACHSKI-352 | GK0951 | 972454  | 973266  | 5     | unknown conserved protein                                                                            |
| ACHSKI-353 | GK0952 | 973364  | 974551  | 2.2   | aspartate aminotransferase (EC 2.6.1.-)                                                              |
| ACHSKI-354 | GK0964 | 986864  | 987382  | 5     | unknown conserved protein                                                                            |
| ACHSKI-355 | GK0969 | 992850  | 993530  | 5     | unknown conserved protein                                                                            |
| ACHSKI-356 | GK0975 | 1000474 | 1001148 | 4.2   | aluminum resistance protein                                                                          |
| ACHSKI-357 | GK0976 | 1001145 | 1001582 | 2.5   | 6-pyruvoyl tetrahydrobiopterin synthase                                                              |
| ACHSKI-358 | GK0977 | 1001582 | 1002316 | 2.5   | coenzyme PQQ synthesis                                                                               |
| ACHSKI-359 | GK0978 | 1002369 | 1002866 | 5     | unknown conserved protein                                                                            |
| ACHSKI-360 | GK0986 | 1007324 | 1008616 | 1.3   | two-component sensor histidine kinase (EC 2.7.3.-)                                                   |
| ACHSKI-361 | GK0990 | 1011237 | 1012094 | 3.5.2 | transcription antiterminator                                                                         |
| ACHSKI-362 | GK0991 | 1012327 | 1014345 | 1.2   | PTS system, glucose-specific enzyme II, A component                                                  |
| ACHSKI-363 | GK0995 | 1016306 | 1016572 | 2.1.1 | phosphocarrier protein (Histidine-containing protein)                                                |
| ACHSKI-364 | GK0996 | 1016572 | 1018293 | 1.2   | phosphoenolpyruvate-protein phosphotransferase (EC 2.7.3.9)                                          |
| ACHSKI-365 | GK1023 | 1048979 | 1051831 | 2.1.3 | 2-oxoglutarate dehydrogenase complex E1 component (EC 1.2.4.2)                                       |
| ACHSKI-366 | GK1024 | 1051863 | 1053131 | 2.1.3 | 2-oxoglutarate dehydrogenase complex E2 component (dihydroliipoamide transsuccinylase) (EC 2.3.1.61) |
| ACHSKI-367 | GK1026 | 1053572 | 1054357 | 2.4   | 3-oxoacyl-(acyl carrier protein) reductase                                                           |
| ACHSKI-368 | GK1041 | 1069101 | 1070504 | 5     | unknown conserved protein                                                                            |
| ACHSKI-369 | GK1045 | 1073156 | 1074373 | 5     | unknown conserved protein                                                                            |

|            |        |         |         |       |                                                                                                                  |
|------------|--------|---------|---------|-------|------------------------------------------------------------------------------------------------------------------|
| ACHSKI-370 | GK1048 | 1075087 | 1075560 | 5     | unknown conserved protein                                                                                        |
| ACHSKI-371 | GK1049 | 1075757 | 1076467 | 2.2   | tetrahydrodipicolinate succinylase (EC 2.3.1.117)                                                                |
| ACHSKI-372 | GK1050 | 1076527 | 1077660 | 2.2   | hippurate hydrolase                                                                                              |
| ACHSKI-373 | GK1052 | 1078127 | 1078789 | 1.2   | potassium transport system NAD-binding component                                                                 |
| ACHSKI-374 | GK1053 | 1078861 | 1080528 | 5     | unknown conserved protein                                                                                        |
| ACHSKI-375 | GK1054 | 1080525 | 1080740 | 5     | unknown conserved protein                                                                                        |
| ACHSKI-376 | GK1056 | 1081204 | 1081980 | 5     | unknown conserved protein                                                                                        |
| ACHSKI-377 | GK1057 | 1082033 | 1082587 | 3.8   | peptide deformylase 2 (PDF 2) N-formylmethionylaminoacyl-tRNA deformylase (EC 3.5.1.88)                          |
| ACHSKI-378 | GK1058 | 1083115 | 1084224 | 2.1.2 | dehydrogenase E1 component, alpha subunit (lipoamide) (EC 1.2.4.1)                                               |
| ACHSKI-379 | GK1059 | 1084228 | 1085205 | 2.1.2 | dehydrogenase E1 component, beta subunit (lipoamide) (EC 1.2.4.1)                                                |
| ACHSKI-380 | GK1060 | 1085278 | 1086582 | 2.1.2 | dihydrolipoamide acetyltransferase component of pyruvate dehydrogenase complex (E2)(EC 2.3.1.12)                 |
| ACHSKI-381 | GK1061 | 1086587 | 1087999 | 2.1.2 | dihydrolipoamide dehydrogenase (E3 component of pyruvate complex) (EC 1.8.1.4)                                   |
| ACHSKI-382 | GK1067 | 1092197 | 1092385 | 5     | unknown conserved protein                                                                                        |
| ACHSKI-383 | GK1068 | 1092491 | 1093285 | 2.1.1 | myo-inositol-1(or 4)-monophosphatase (Inositol-1-phosphatase) (I-1-Pase)                                         |
| ACHSKI-384 | GK1070 | 1093625 | 1095469 | 3.7.4 | GTP-binding elongation factor EF-G                                                                               |
| ACHSKI-385 | GK1071 | 1095560 | 1095868 | 5     | unknown conserved protein                                                                                        |
| ACHSKI-386 | GK1076 | 1098818 | 1099324 | 5     | unknown conserved protein                                                                                        |
| ACHSKI-387 | GK1077 | 1099487 | 1099774 | 5     | unknown conserved protein                                                                                        |
| ACHSKI-388 | GK1078 | 1099900 | 1101111 | 1.7   | cell-division protein                                                                                            |
| ACHSKI-389 | GK1079 | 1101174 | 1104617 | 2.1.2 | pyruvate carboxylase (EC 6.4.1.1)                                                                                |
| ACHSKI-390 | GK1080 | 1104783 | 1105736 | 1.4   | heme O oxygenase                                                                                                 |
| ACHSKI-391 | GK1081 | 1106117 | 1107046 | 1.4   | heme O synthetase                                                                                                |
| ACHSKI-392 | GK1082 | 1107124 | 1108194 | 1.4   | cytochrome c oxidase subunit II                                                                                  |
| ACHSKI-393 | GK1083 | 1108217 | 1110088 | 1.4   | cytochrome c oxidase subunit I                                                                                   |
| ACHSKI-394 | GK1084 | 1110088 | 1110708 | 1.4   | cytochrome c oxidase subunit III                                                                                 |
| ACHSKI-395 | GK1085 | 1110713 | 1111045 | 1.4   | cytochrome c oxidase subunit IV                                                                                  |
| ACHSKI-396 | GK1086 | 1111148 | 1112050 | 5     | unknown conserved protein                                                                                        |
| ACHSKI-397 | GK1087 | 1112099 | 1112554 | 5     | unknown conserved protein                                                                                        |
| ACHSKI-398 | GK1089 | 1112991 | 1113350 | 5     | unknown conserved protein                                                                                        |
| ACHSKI-399 | GK1091 | 1114075 | 1115082 | 5     | unknown conserved protein                                                                                        |
| ACHSKI-400 | GK1092 | 1115151 | 1115546 | 5     | unknown conserved protein                                                                                        |
| ACHSKI-401 | GK1093 | 1115559 | 1115792 | 5     | unknown conserved protein                                                                                        |
| ACHSKI-402 | GK1095 | 1116342 | 1116788 | 5     | unknown conserved protein                                                                                        |
| ACHSKI-403 | GK1096 | 1116805 | 1117074 | 5     | unknown conserved protein                                                                                        |
| ACHSKI-404 | GK1098 | 1117919 | 1118515 | 5     | unknown conserved protein                                                                                        |
| ACHSKI-405 | GK1099 | 1118481 | 1118975 | 1.1   | lipopolysaccharide core biosynthesis (Pantetheine-phosphate adenyltransferase) (Dephospho-CoA pyrophosphorylase) |
| ACHSKI-406 | GK1100 | 1119115 | 1120350 | 5     | unknown conserved protein                                                                                        |
| ACHSKI-407 | GK1102 | 1121267 | 1122286 | 5     | unknown conserved protein                                                                                        |
| ACHSKI-408 | GK1104 | 1123789 | 1124328 | 5     | unknown conserved protein                                                                                        |
| ACHSKI-409 | GK1105 | 1124474 | 1124647 | 3.7.1 | 50S ribosomal protein L32 (Ribosomal protein I) (BL37)                                                           |
| ACHSKI-410 | GK1107 | 1125639 | 1126217 | 5     | unknown conserved protein                                                                                        |
| ACHSKI-411 | GK1110 | 1127669 | 1129297 | 5     | unknown conserved protein                                                                                        |
| ACHSKI-412 | GK1111 | 1129576 | 1130508 | 5     | unknown conserved protein                                                                                        |
| ACHSKI-413 | GK1112 | 1130604 | 1130960 | 1.7   | cell division protein                                                                                            |
| ACHSKI-414 | GK1113 | 1130967 | 1133177 | 1.1   | penicillin-binding protein 2B                                                                                    |
| ACHSKI-415 | GK1114 | 1133249 | 1135183 | 1.1   | penicillin-binding protein (sporulation specific penicillin-binding protein)                                     |
| ACHSKI-416 | GK1115 | 1135297 | 1136766 | 1.1   | UDP-N-acetylmuramoylananine-D-glutamate-2,6- diaminopimelate ligase (EC 6.3.2.13)                                |
| ACHSKI-417 | GK1117 | 1137203 | 1138177 | 1.1   | phospho-N-acetylmuramoyl-pentapeptide transferase (EC 2.7.8.13)                                                  |
| ACHSKI-418 | GK1118 | 1138178 | 1139533 | 1.1   | UDP-N-acetylmuramoylalanine D-glutamate ligase (D-glutamic acid adding enzyme) (EC 6.3.2.9)                      |
| ACHSKI-419 | GK1119 | 1139587 | 1140687 | 1.8   | stage V sporulation protein E                                                                                    |
| ACHSKI-420 | GK1120 | 1140900 | 1141685 | 1.7   | cell-division initiation protein (septum formation)                                                              |
| ACHSKI-421 | GK1124 | 1143675 | 1144943 | 1.7   | cell division protein (septum formation)                                                                         |
| ACHSKI-422 | GK1125 | 1144971 | 1146104 | 1.7   | cell-division initiation protein (septum formation)                                                              |



|            |        |         |         |       |                                                                                       |
|------------|--------|---------|---------|-------|---------------------------------------------------------------------------------------|
| ACHSKI-423 | GK1126 | 1146482 | 1147396 | 1.8   | protease (sporulation sigma-E factor processing peptidase)                            |
| ACHSKI-424 | GK1127 | 1147449 | 1148168 | 3.5.1 | RNA polymerase sigma-E factor precursor (Sigma-29) (Stage II sporulation protein GB)  |
| ACHSKI-425 | GK1128 | 1148289 | 1149068 | 3.5.1 | RNA polymerase sporulation-specific sigma factor (sigma-G)                            |
| ACHSKI-426 | GK1130 | 1149656 | 1150480 | 5     | unknown conserved protein                                                             |
| ACHSKI-427 | GK1131 | 1150477 | 1151151 | 5     | unknown conserved protein                                                             |
| ACHSKI-428 | GK1132 | 1151165 | 1151593 | 5     | unknown conserved protein                                                             |
| ACHSKI-429 | GK1133 | 1151597 | 1151869 | 5     | unknown conserved protein                                                             |
| ACHSKI-430 | GK1134 | 1151992 | 1152765 | 5     | unknown conserved protein                                                             |
| ACHSKI-431 | GK1135 | 1152844 | 1153356 | 1.7   | cell-division initiation protein (septum placement)                                   |
| ACHSKI-432 | GK1136 | 1153728 | 1156502 | 3.7.2 | isoleucyl-tRNA synthetase (EC 6.1.1.5)                                                |
| ACHSKI-433 | GK1145 | 1163955 | 1164419 | 1.6   | signal peptidase II (EC 3.4.23.36)                                                    |
| ACHSKI-434 | GK1147 | 1165519 | 1166058 | 3.5.2 | pyrimidine operon regulatory protein; uracil phosphoribosyltransferase (EC 2.4.2.9)   |
| ACHSKI-435 | GK1148 | 1166217 | 1167515 | 1.2   | uracil transport protein (uracil permease)                                            |
| ACHSKI-436 | GK1149 | 1167685 | 1168611 | 2.3   | aspartate carbamoyltransferase (EC 2.1.3.2)                                           |
| ACHSKI-437 | GK1150 | 1168574 | 1169860 | 2.3   | dihydroorotase (EC 3.5.2.3)                                                           |
| ACHSKI-438 | GK1151 | 1169863 | 1170957 | 2.3   | carbamoyl-phosphate synthase (glutamine-hydrolyzing) (EC 6.3.5.5)                     |
| ACHSKI-439 | GK1152 | 1170950 | 1174147 | 2.3   | carbamoyl-phosphate synthase (glutamine-hydrolyzing) (EC 6.3.5.5)                     |
| ACHSKI-440 | GK1153 | 1174144 | 1174917 | 2.3   | dihydroorotate dehydrogenase electron transfer subunit                                |
| ACHSKI-441 | GK1154 | 1174914 | 1175855 | 2.3   | dihydroorotate dehydrogenase, catalytic subunit (Dihydroorotate oxidase) (EC 1.3.3.1) |
| ACHSKI-442 | GK1155 | 1175827 | 1176561 | 2.3   | orotidine-5'-phosphate decarboxylase (EC 4.1.1.23)                                    |
| ACHSKI-443 | GK1157 | 1176947 | 1177570 | 2.3   | orotate phosphoribosyltransferase (EC 2.4.2.10)                                       |
| ACHSKI-444 | GK1163 | 1181658 | 1183397 | 4.1   | fibrinectin/fibrinogen-binding protein                                                |
| ACHSKI-445 | GK1164 | 1183713 | 1186385 | 1.2   | calcium-transporting ATPase                                                           |
| ACHSKI-446 | GK1166 | 1187406 | 1187669 | 5     | unknown conserved protein                                                             |
| ACHSKI-447 | GK1167 | 1187681 | 1188298 | 2.3   | Guanylate kinase (EC 2.7.4.8)                                                         |
| ACHSKI-448 | GK1168 | 1188301 | 1188501 | 3.5.1 | DNA-directed RNA polymerase omega subunit(Transcriptase omega chain)                  |
| ACHSKI-449 | GK1169 | 1188551 | 1189756 | 2.5   | pantothenate metabolism flavoprotein                                                  |
| ACHSKI-450 | GK1170 | 1189753 | 1192158 | 3.1   | primosomal replication factor Y (primosomal protein N')                               |
| ACHSKI-451 | GK1172 | 1192655 | 1193614 | 3.7.3 | methionyl-tRNA formyltransferase                                                      |
| ACHSKI-452 | GK1173 | 1193601 | 1194935 | 3.6   | RNA-binding Sun protein                                                               |
| ACHSKI-453 | GK1174 | 1194940 | 1196037 | 5     | unknown conserved protein                                                             |
| ACHSKI-454 | GK1175 | 1196043 | 1196792 | 3.8   | serine/threonine phosphatase                                                          |
| ACHSKI-455 | GK1176 | 1196798 | 1198768 | 3.8   | serine/threonine-protein kinase (EC 2.7.1.-)                                          |
| ACHSKI-456 | GK1177 | 1198773 | 1199654 | 5     | unknown conserved protein                                                             |
| ACHSKI-457 | GK1178 | 1199651 | 1200313 | 2.1.1 | ribulose-phosphate 3-epimerase (EC 5.1.3.1)                                           |
| ACHSKI-458 | GK1181 | 1201324 | 1201509 | 3.7.1 | 50S ribosomal protein L28                                                             |
| ACHSKI-459 | GK1182 | 1201738 | 1202100 | 5     | unknown conserved protein                                                             |
| ACHSKI-460 | GK1183 | 1202123 | 1203787 | 5     | unknown conserved protein                                                             |
| ACHSKI-461 | GK1184 | 1203861 | 1204523 | 2.2   | L-serine dehydratase (L-serine deaminase) (EC 4.3.1.17) beta chain                    |
| ACHSKI-462 | GK1185 | 1204597 | 1205481 | 2.2   | L-serine dehydratase (L-serine deaminase) (EC 4.3.1.17) alpha chain                   |
| ACHSKI-463 | GK1186 | 1205478 | 1207526 | 3.3   | ATP-dependent DNA helicase (EC 3.6.1.-)                                               |
| ACHSKI-464 | GK1187 | 1207825 | 1208421 | 5     | unknown conserved protein                                                             |
| ACHSKI-465 | GK1188 | 1208405 | 1209388 | 2.4   | fatty acid/phospholipid biosynthesis                                                  |
| ACHSKI-466 | GK1189 | 1209410 | 1210351 | 2.4   | malonyl CoA-acyl carrier protein transacylase (EC 2.3.1.39)                           |
| ACHSKI-467 | GK1190 | 1210356 | 1211099 | 2.4   | 3-ketoacyl-acyl carrier protein reductase (EC 1.1.1.100)                              |
| ACHSKI-468 | GK1191 | 1211161 | 1211394 | 2.4   | acyl carrier protein                                                                  |
| ACHSKI-469 | GK1192 | 1211574 | 1212314 | 3.6   | dsRNA-specific ribonuclease (EC 3.1.26.3)                                             |
| ACHSKI-470 | GK1193 | 1212543 | 1216106 | 3.4   | chromosome segregation ATPases (SMC)                                                  |
| ACHSKI-471 | GK1194 | 1216126 | 1217112 | 1.6   | signal recognition particle GTPase (docking protein)                                  |
| ACHSKI-472 | GK1195 | 1217285 | 1217617 | 5     | unknown conserved protein                                                             |
| ACHSKI-473 | GK1196 | 1217634 | 1218974 | 1.6   | signal recognition particle GTPase                                                    |
| ACHSKI-474 | GK1197 | 1219069 | 1219341 | 3.7.1 | 30S ribosomal protein S16                                                             |
| ACHSKI-475 | GK1198 | 1219353 | 1219589 | 3.6   | RNA-binding protein                                                                   |

|            |        |         |         |       |                                                                                                    |
|------------|--------|---------|---------|-------|----------------------------------------------------------------------------------------------------|
| ACHSKI-476 | GK1200 | 1220071 | 1220598 | 3.6   | 16S rRNA processing protein                                                                        |
| ACHSKI-477 | GK1201 | 1220598 | 1221332 | 3.6   | tRNA (guanine-N(1)-)-methyltransferase (MIG-methyltransferase) (EC 2.1.1.31)                       |
| ACHSKI-478 | GK1202 | 1221465 | 1221827 | 3.7.1 | 50S ribosomal protein L19                                                                          |
| ACHSKI-479 | GK1203 | 1221948 | 1222502 | 1.6   | type I signal peptidase                                                                            |
| ACHSKI-480 | GK1204 | 1222521 | 1223381 | 5     | unknown conserved protein                                                                          |
| ACHSKI-481 | GK1205 | 1223467 | 1224249 | 3.1   | ribonuclease HII (EC 3.1.26.4)                                                                     |
| ACHSKI-482 | GK1208 | 1226215 | 1227375 | 2.1.3 | succinyl-CoA synthetase (EC 6.2.1.5) beta subunit (succinate-CoA ligase beta subunit)              |
| ACHSKI-483 | GK1209 | 1227393 | 1228295 | 2.1.3 | succinyl-CoA synthetase (EC 6.2.1.5) alpha subunit                                                 |
| ACHSKI-484 | GK1211 | 1229577 | 1231652 | 3.4   | DNA topoisomerase I (EC 5.99.1.2) (omega-protein) (relaxing enzyme) (untwisting enzyme)            |
| ACHSKI-485 | GK1212 | 1231781 | 1232650 | 4.4   | integrase/recombinase                                                                              |
| ACHSKI-486 | GK1213 | 1232674 | 1233216 | 4.1   | proteasome protease subunit                                                                        |
| ACHSKI-487 | GK1214 | 1233231 | 1234628 | 4.1   | ATP-dependent protease ATPase subunit                                                              |
| ACHSKI-488 | GK1215 | 1234645 | 1235424 | 3.5.2 | transcription pleiotropic repressor                                                                |
| ACHSKI-489 | GK1216 | 1235621 | 1236010 | 1.5   | flagellar basal-body rod protein                                                                   |
| ACHSKI-490 | GK1217 | 1236014 | 1236466 | 1.5   | flagellar basal-body rod protein                                                                   |
| ACHSKI-491 | GK1220 | 1238463 | 1239482 | 1.5   | flagellar motor switch protein                                                                     |
| ACHSKI-492 | GK1222 | 1240265 | 1241533 | 1.5   | flagellar-specific ATP synthase                                                                    |
| ACHSKI-493 | GK1226 | 1243839 | 1244267 | 1.5   | flagellar hook capping protein                                                                     |
| ACHSKI-494 | GK1227 | 1244297 | 1245088 | 1.5   | flagellar hook protein                                                                             |
| ACHSKI-495 | GK1231 | 1246794 | 1247975 | 1.5   | flagellar motor switch protein                                                                     |
| ACHSKI-496 | GK1232 | 1248001 | 1248360 | 3.5.2 | two-component response regulator involved in modulation of flagellar                               |
| ACHSKI-497 | GK1234 | 1249029 | 1249697 | 1.5   | flagellar biosynthetic protein                                                                     |
| ACHSKI-498 | GK1235 | 1249713 | 1249982 | 1.5   | flagellar protein required for flagellar formation                                                 |
| ACHSKI-499 | GK1236 | 1249989 | 1250762 | 1.5   | flagellar biosynthetic protein                                                                     |
| ACHSKI-500 | GK1237 | 1250764 | 1251846 | 1.5   | flagellar biosynthetic protein                                                                     |
| ACHSKI-501 | GK1249 | 1262583 | 1263290 | 3.7.1 | 30S ribosomal protein S2                                                                           |
| ACHSKI-502 | GK1250 | 1263448 | 1264332 | 3.7.4 | translation elongation factor Ts (EF-Ts)                                                           |
| ACHSKI-503 | GK1251 | 1264401 | 1265123 | 2.3   | uridylate kinase (EC 2.7.4.-)                                                                      |
| ACHSKI-504 | GK1252 | 1265126 | 1265683 | 3.7.5 | ribosome recycling factor                                                                          |
| ACHSKI-505 | GK1253 | 1265766 | 1266539 | 2.4   | undecaprenyl pyrophosphate synthetase (UPP synthetase) (EC 2.5.1.31)                               |
| ACHSKI-506 | GK1254 | 1266536 | 1267330 | 2.4   | CDP-diglyceride synthase (phosphatidate cytidyltransferase) (EC 2.7.7.41)                          |
| ACHSKI-507 | GK1258 | 1271567 | 1275901 | 3.1   | DNA-directed DNA polymerase III (EC 2.7.7.7) alpha chain                                           |
| ACHSKI-508 | GK1259 | 1276146 | 1276619 | 5     | unknown conserved protein                                                                          |
| ACHSKI-509 | GK1260 | 1276644 | 1277795 | 3.5.4 | transcription termination-antitermination factor                                                   |
| ACHSKI-510 | GK1261 | 1277809 | 1278099 | 5     | unknown conserved protein                                                                          |
| ACHSKI-511 | GK1262 | 1278089 | 1278397 | 3.7.1 | ribosomal protein (L7AE family)                                                                    |
| ACHSKI-512 | GK1263 | 1278411 | 1280540 | 3.7.3 | translation initiation factor IF-2                                                                 |
| ACHSKI-513 | GK1264 | 1280625 | 1280903 | 5     | unknown conserved protein                                                                          |
| ACHSKI-514 | GK1265 | 1280964 | 1281302 | 3.7.3 | ribosome-binding factor A                                                                          |
| ACHSKI-515 | GK1267 | 1282302 | 1283288 | 2.5   | riboflavin kinase (EC 2.7.1.26) (flavokinase); FAD synthetase (EC 2.7.7.2) (FAD pyrophosphorylase) |
| ACHSKI-516 | GK1268 | 1283376 | 1283645 | 3.7.1 | 30S ribosomal protein S15                                                                          |
| ACHSKI-517 | GK1269 | 1283786 | 1285957 | 2.3   | polyribonucleotide nucleotidyltransferase (polynucleotide phosphorylase) (EC 2.7.7.8)              |
| ACHSKI-518 | GK1270 | 1286045 | 1287028 | 2.1.1 | deacetylase                                                                                        |
| ACHSKI-519 | GK1271 | 1286982 | 1288262 | 3.8   | processing protease                                                                                |
| ACHSKI-520 | GK1272 | 1288325 | 1288567 | 5     | unknown conserved protein                                                                          |
| ACHSKI-521 | GK1273 | 1288760 | 1289665 | 1.8   | dipicolinate synthase subunit A                                                                    |
| ACHSKI-522 | GK1274 | 1289662 | 1290267 | 1.8   | dipicolinate synthase subunit B                                                                    |
| ACHSKI-523 | GK1275 | 1290361 | 1291422 | 2.2   | aspartate-semialdehyde dehydrogenase (EC 1.2.1.11)                                                 |
| ACHSKI-524 | GK1276 | 1291443 | 1292696 | 2.2   | aspartate kinase I (EC 2.7.2.4)                                                                    |
| ACHSKI-525 | GK1277 | 1292732 | 1293577 | 2.2   | dihydrodipicolinate synthase (EC 4.2.1.52)                                                         |
| ACHSKI-526 | GK1279 | 1295535 | 1296275 | 5     | unknown conserved protein                                                                          |
| ACHSKI-527 | GK1281 | 1296605 | 1298935 | 1.8   | DNA translocase (stage III sporulation protein E)                                                  |
| ACHSKI-528 | GK1282 | 1299145 | 1299876 | 3.5.2 | transcriptional regulator (GntR family)                                                            |

|            |        |         |         |       |                                                                                                                                        |
|------------|--------|---------|---------|-------|----------------------------------------------------------------------------------------------------------------------------------------|
| ACHSKI-529 | GK1287 | 1304867 | 1306162 | 5     | unknown conserved protein                                                                                                              |
| ACHSKI-530 | GK1288 | 1306143 | 1307432 | 5     | unknown conserved protein                                                                                                              |
| ACHSKI-531 | GK1289 | 1307460 | 1308203 | 2.4   | 3-oxoacyl- acyl-carrier protein reductase                                                                                              |
| ACHSKI-532 | GK1290 | 1308266 | 1308514 | 5     | unknown conserved protein                                                                                                              |
| ACHSKI-533 | GK1291 | 1308646 | 1309437 | 5     | unknown conserved protein                                                                                                              |
| ACHSKI-534 | GK1292 | 1309464 | 1310357 | 5     | unknown conserved protein                                                                                                              |
| ACHSKI-535 | GK1293 | 1310438 | 1311016 | 2.4   | CDP-diacylglycerol--glycerol-3-phosphate 3-phosphatidyltransferase (phosphatidylglycerophosphate synthase) (PGP synthase) (EC 2.7.8.5) |
| ACHSKI-536 | GK1294 | 1311044 | 1312288 | 1.10  | competence-damaged protein                                                                                                             |
| ACHSKI-537 | GK1295 | 1312466 | 1312771 | 6     | unknown                                                                                                                                |
| ACHSKI-538 | GK1297 | 1316667 | 1318223 | 5     | unknown conserved protein                                                                                                              |
| ACHSKI-539 | GK1298 | 1318325 | 1319119 | 5     | unknown conserved protein                                                                                                              |
| ACHSKI-540 | GK1299 | 1319248 | 1319508 | 1.8   | stage V sporulation protein S                                                                                                          |
| ACHSKI-541 | GK1303 | 1323513 | 1325108 | 5     | unknown conserved protein                                                                                                              |
| ACHSKI-542 | GK1304 | 1325086 | 1325517 | 5     | unknown conserved protein                                                                                                              |
| ACHSKI-543 | GK1305 | 1325741 | 1326289 | 1.8   | outer spore coat protein                                                                                                               |
| ACHSKI-544 | GK1306 | 1326404 | 1329094 | 3.2   | DNA mismatch repair protein                                                                                                            |
| ACHSKI-545 | GK1307 | 1329109 | 1331001 | 3.2   | DNA mismatch repair protein                                                                                                            |
| ACHSKI-546 | GK1312 | 1335966 | 1336913 | 3.6   | tRNA delta(2)-isopentenylpyrophosphate transferase (IPP transferase)                                                                   |
| ACHSKI-547 | GK1313 | 1336948 | 1337175 | 4.4   | host factor-I protein                                                                                                                  |
| ACHSKI-548 | GK1324 | 1348986 | 1350233 | 4.1   | GTP-binding protein protease modulator                                                                                                 |
| ACHSKI-549 | GK1325 | 1350247 | 1351518 | 4.2   | aluminum resistance protein                                                                                                            |
| ACHSKI-550 | GK1328 | 1353434 | 1354057 | 3.5.2 | transcription repressor of SOS regulon                                                                                                 |
| ACHSKI-551 | GK1330 | 1354535 | 1355188 | 4.5   | resolvase                                                                                                                              |
| ACHSKI-552 | GK1331 | 1355318 | 1355548 | 5     | unknown conserved protein                                                                                                              |
| ACHSKI-553 | GK1332 | 1355667 | 1357673 | 2.1.2 | transketolase (EC 2.2.1.1)                                                                                                             |
| ACHSKI-554 | GK1333 | 1357926 | 1358363 | 5     | unknown conserved protein                                                                                                              |
| ACHSKI-555 | GK1334 | 1358453 | 1358665 | 5     | unknown conserved protein                                                                                                              |
| ACHSKI-556 | GK1336 | 1360619 | 1362397 | 1.2   | ABC transporter (ATP-binding protein)                                                                                                  |
| ACHSKI-557 | GK1339 | 1362803 | 1363510 | 1.4   | cytochrome c biogenesis protein                                                                                                        |
| ACHSKI-558 | GK1341 | 1364143 | 1364616 | 5     | unknown conserved protein                                                                                                              |
| ACHSKI-559 | GK1342 | 1364806 | 1365240 | 5     | unknown conserved protein                                                                                                              |
| ACHSKI-560 | GK1347 | 1368103 | 1370718 | 2.1.3 | aconitate hydratase (citrate hydro-lyase) (aconitase) (EC 4.2.1.3)                                                                     |
| ACHSKI-561 | GK1349 | 1370966 | 1371439 | 5     | unknown conserved protein                                                                                                              |
| ACHSKI-562 | GK1351 | 1372704 | 1373369 | 5     | unknown conserved protein                                                                                                              |
| ACHSKI-563 | GK1359 | 1378193 | 1379011 | 1.2   | glycerol uptake facilitator                                                                                                            |
| ACHSKI-564 | GK1360 | 1379061 | 1380551 | 2.1.1 | glycerol kinase (ATP:glycerol 3-phosphotransferase) (EC 2.7.1.30)                                                                      |
| ACHSKI-565 | GK1408 | 1437964 | 1438860 | 3.5.2 | transcriptional regulator (LysR family)                                                                                                |
| ACHSKI-566 | GK1409 | 1439090 | 1440919 | 2.7   | sulfite reductase (EC 1.8.1.2) flavoprotein subunit                                                                                    |
| ACHSKI-567 | GK1410 | 1440945 | 1442666 | 2.7   | sulfite reductase (EC 1.8.1.2) hemoprotein beta-component                                                                              |
| ACHSKI-568 | GK1427 | 1463577 | 1464929 | 2.5   | adenosylmethionine-8-amino-7-oxononanoate aminotransferase                                                                             |
| ACHSKI-569 | GK1431 | 1468293 | 1472852 | 2.2   | glutamate synthase large subunit (EC 1.4.1.13)                                                                                         |
| ACHSKI-570 | GK1437 | 1479501 | 1480229 | 3.5.2 | transcriptional regulator (Sir2 family)                                                                                                |
| ACHSKI-571 | GK1438 | 1480372 | 1480923 | 4.1   | intracellular proteinase                                                                                                               |
| ACHSKI-572 | GK1442 | 1484391 | 1485125 | 5     | unknown conserved protein                                                                                                              |
| ACHSKI-573 | GK1448 | 1490454 | 1490963 | 5     | unknown conserved protein                                                                                                              |
| ACHSKI-574 | GK1461 | 1501487 | 1502299 | 1.2   | ABC transport er(ATP-binding protein) iron(III) dicitrate                                                                              |
| ACHSKI-575 | GK1466 | 1506208 | 1506846 | 2.1.2 | phosphoglycerate mutase (EC 5.4.2.1)                                                                                                   |
| ACHSKI-576 | GK1470 | 1510679 | 1511083 | 2.5   | 6-pyruvoyltetrahydropterin synthase (PTP synthase) (EC 4.2.3.12)                                                                       |
| ACHSKI-577 | GK1478 | 1517620 | 1520325 | 6     | unknown                                                                                                                                |
| ACHSKI-578 | GK1480 | 1520704 | 1521444 | 3.5.2 | transcriptional regulator                                                                                                              |
| ACHSKI-579 | GK1493 | 1534029 | 1534964 | 5     | unknown conserved protein                                                                                                              |
| ACHSKI-580 | GK1498 | 1538807 | 1539241 | 5     | unknown conserved protein                                                                                                              |
| ACHSKI-581 | GK1500 | 1540137 | 1540811 | 5     | unknown conserved protein                                                                                                              |

|            |        |         |         |       |                                                   |
|------------|--------|---------|---------|-------|---------------------------------------------------|
| ACHSKI-582 | GK1501 | 1540735 | 1541775 | 5     | unknown conserved protein                         |
| ACHSKI-583 | GK1502 | 1541772 | 1542542 | 4.2   | lactam utilization protein                        |
| ACHSKI-584 | GK1509 | 1549629 | 1550438 | 2.5   | hydroxyethylthiazole kinase (EC 2.7.1.50)         |
| ACHSKI-585 | GK1510 | 1550457 | 1551257 | 2.5   | phosphomethylpyrimidine kinase (EC 2.7.4.7)       |
| ACHSKI-586 | GK1511 | 1551263 | 1551928 | 2.5   | thiamine-phosphate diphosphorylase (EC 2.5.1.3)   |
| ACHSKI-587 | GK1517 | 1554731 | 1556092 | 2.2   | subtilisin-type proteinase (EC 3.4.21.-)          |
| ACHSKI-588 | GK1525 | 1561104 | 1562027 | 2.2   | cysteine synthase (EC 4.2.99.8)                   |
| ACHSKI-589 | GK1534 | 1573125 | 1574342 | 2.1.3 | malate dehydrogenase (malic enzyme) (EC 1.1.1.38) |
| ACHSKI-590 | GK1541 | 1580889 | 1581185 | 5     | unknown conserved protein                         |
| ACHSKI-591 | GK1543 | 1581829 | 1582971 | 5     | unknown conserved protein                         |
| ACHSKI-592 | GK1544 | 1583094 | 1585031 | 3.2   | ATP-dependent helicase                            |
| ACHSKI-593 | GK1553 | 1593033 | 1596824 | 5     | unknown conserved protein                         |
| ACHSKI-594 | GK1561 | 1599772 | 1599999 | 1.8   | thioredoxin-like protein                          |
| ACHSKI-595 | GK1562 | 1600116 | 1600532 | 5     | unknown conserved protein                         |
| ACHSKI-596 | GK1565 | 1601304 | 1601594 | 5     | unknown conserved protein                         |
| ACHSKI-597 | GK1585 | 1616585 | 1617514 | 5     | unknown conserved protein (N_term)                |
| ACHSKI-598 | GK1589 | 1619043 | 1620410 | 5     | unknown conserved protein                         |
| ACHSKI-599 | GK1599 | 1629820 | 1631172 | 2.5   | biotin carboxylase (EC 6.3.4.14)                  |
| ACHSKI-600 | GK1601 | 1631427 | 1632326 | 2.4   | hydroxymethylglutaryl-CoA lyase                   |
| ACHSKI-601 | GK1602 | 1632341 | 1633123 | 2.4   | enoyl-CoA hydratase                               |
| ACHSKI-602 | GK1603 | 1633150 | 1634847 | 2.1.1 | propionyl-CoA carboxylase                         |
| ACHSKI-603 | GK1607 | 1636395 | 1638107 | 1.2   | multidrug resistance protein                      |
| ACHSKI-604 | GK1619 | 1649080 | 1649577 | 5     | unknown conserved protein (C_term truncated)      |
| ACHSKI-605 | GK1624 | 1652972 | 1654591 | 1.9   | spore germination protein                         |
| ACHSKI-606 | GK1625 | 1654588 | 1655796 | 1.9   | spore germination protein                         |
| ACHSKI-607 | GK1627 | 1657234 | 1658631 | 6     | unknown                                           |
| ACHSKI-608 | GK1630 | 1659995 | 1661731 | 1.2   | ABC transporter (ATP-binding protein)             |
| ACHSKI-609 | GK1631 | 1661712 | 1663520 | 1.2   | ABC transporter (ATP-binding protein)             |
| ACHSKI-610 | GK1632 | 1663680 | 1664327 | 5     | unknown conserved protein                         |
| ACHSKI-611 | GK1633 | 1664333 | 1665343 | 5     | unknown conserved protein                         |
| ACHSKI-612 | GK1652 | 1680429 | 1681178 | 1.4   | nitro/flavin reductase (EC 1.19.6.-)              |
| ACHSKI-613 | GK1653 | 1681368 | 1682111 | 3.5.2 | transcriptional regulatory (Sir2 family)          |
| ACHSKI-614 | GK1676 | 1703349 | 1704671 | 4.2   | nitric oxide synthase                             |
| ACHSKI-615 | GK1685 | 1709751 | 1710530 | 2.4   | enoyl-CoA hydratase (EC 4.2.1.17)                 |
| ACHSKI-616 | GK1694 | 1717945 | 1719309 | 1.2   | amino acid permease                               |
| ACHSKI-617 | GK1696 | 1721408 | 1721890 | 5     | unknown conserved protein                         |
| ACHSKI-618 | GK1697 | 1721880 | 1723322 | 5     | unknown conserved protein                         |
| ACHSKI-619 | GK1716 | 1743550 | 1744026 | 5     | unknown conserved protein                         |
| ACHSKI-620 | GK1737 | 1763762 | 1764997 | 1.4   | flavo-hemoglobin                                  |
| ACHSKI-621 | GK1743 | 1769795 | 1770244 | 5     | unknown conserved protein                         |
| ACHSKI-622 | GK1750 | 1777714 | 1780158 | 3.4   | DNA topoisomerase IV (EC 5.99.1.-) subunit A      |
| ACHSKI-623 | GK1751 | 1780218 | 1782155 | 3.4   | DNA topoisomerase IV (EC 5.99.1.-) subunit B      |
| ACHSKI-624 | GK1752 | 1782316 | 1782735 | 5     | unknown conserved protein                         |
| ACHSKI-625 | GK1763 | 1796438 | 1798060 | 2.3   | 5'-nucleotidase                                   |
| ACHSKI-626 | GK1766 | 1799546 | 1800139 | 5     | unknown conserved protein                         |
| ACHSKI-627 | GK1770 | 1803050 | 1803622 | 5     | unknown conserved protein                         |
| ACHSKI-628 | GK1774 | 1806586 | 1807029 | 5     | unknown conserved protein                         |
| ACHSKI-629 | GK1775 | 1807209 | 1807703 | 2.5   | dihydrofolate reductase (EC 1.5.1.3)              |
| ACHSKI-630 | GK1776 | 1807717 | 1808511 | 2.3   | thymidylate synthetase (EC 2.1.1.45)              |
| ACHSKI-631 | GK1778 | 1809382 | 1809966 | 5     | unknown conserved protein                         |
| ACHSKI-632 | GK1784 | 1814534 | 1815685 | 5     | unknown conserved protein                         |
| ACHSKI-633 | GK1785 | 1815712 | 1816188 | 4.1   | glutathione peroxidase                            |
| ACHSKI-634 | GK1787 | 1816888 | 1817796 | 2.2   | homoserine O-succinyltransferase (EC 2.3.1.46)    |

|            |        |         |         |       |                                                                                                                                             |
|------------|--------|---------|---------|-------|---------------------------------------------------------------------------------------------------------------------------------------------|
| ACHSKI-635 | GK1804 | 1830501 | 1831325 | 5     | unknown conserved protein                                                                                                                   |
| ACHSKI-636 | GK1814 | 1838410 | 1839297 | 2.4   | glycerophosphoryl diester phosphodiesterase (EC 3.1.4.46)                                                                                   |
| ACHSKI-637 | GK1817 | 1843449 | 1844021 | 6     | unknown                                                                                                                                     |
| ACHSKI-638 | GK1838 | 1867004 | 1868875 | 1.2   | PTS system, fructose-specific enzyme II, BC component                                                                                       |
| ACHSKI-639 | GK1839 | 1868900 | 1869811 | 2.1.1 | fructose-1-phosphate kinase (EC 2.7.1.56)                                                                                                   |
| ACHSKI-640 | GK1840 | 1869808 | 1870560 | 3.5.2 | transcriptional regulator (DeoR family)                                                                                                     |
| ACHSKI-641 | GK1857 | 1885157 | 1886476 | 1.2   | PTS system, cellobiose-specific enzyme II, C component                                                                                      |
| ACHSKI-642 | GK1871 | 1897420 | 1898607 | 4.1   | alcohol dehydrogenase                                                                                                                       |
| ACHSKI-643 | GK1872 | 1898683 | 1899717 | 2.1.1 | oxidoreductase                                                                                                                              |
| ACHSKI-644 | GK1906 | 1943990 | 1944676 | 2.1.1 | L-ribulose-5-phosphate 4-epimerase (phosphoribulose isomerase) (EC 5.1.3.4)                                                                 |
| ACHSKI-645 | GK1914 | 1954643 | 1955407 | 2.4   | enoyl-CoA hydratase (3-hydroxybutyryl-CoA dehydratase)                                                                                      |
| ACHSKI-646 | GK1921 | 1962837 | 1963394 | 2.1.1 | maltose transacetylase (maltose O-acetyltransferase) (EC 2.3.1.79)                                                                          |
| ACHSKI-647 | GK1940 | 1980405 | 1980671 | 6     | unknown                                                                                                                                     |
| ACHSKI-648 | GK1941 | 1980829 | 1982394 | 2.1.1 | gluconokinase (EC 2.7.1.12)                                                                                                                 |
| ACHSKI-649 | GK1947 | 1987673 | 1989763 | 3.5.2 | transcriptional regulator                                                                                                                   |
| ACHSKI-650 | GK1952 | 1994534 | 1995721 | 4.1   | alcohol dehydrogenase                                                                                                                       |
| ACHSKI-651 | GK2000 | 2044347 | 2045828 | 4.1   | aldehyde dehydrogenase                                                                                                                      |
| ACHSKI-652 | GK2003 | 2048432 | 2049025 | 5     | unknown conserved protein                                                                                                                   |
| ACHSKI-653 | GK2013 | 2058546 | 2059856 | 2.1.1 | glycolate oxidase iron-sulfur subunit                                                                                                       |
| ACHSKI-654 | GK2014 | 2059856 | 2061265 | 2.1.1 | glycolate oxidase subunit                                                                                                                   |
| ACHSKI-655 | GK2037 | 2083095 | 2084612 | 4.1   | aldehyde dehydrogenase                                                                                                                      |
| ACHSKI-656 | GK2038 | 2084630 | 2085403 | 2.4   | enoyl-CoA hydratase subunit II (phenylacetic acid catabolism)                                                                               |
| ACHSKI-657 | GK2046 | 2091006 | 2092685 | 2.2   | dihydroxy-acid dehydratase (EC 4.2.1.9)                                                                                                     |
| ACHSKI-658 | GK2048 | 2093206 | 2094330 | 2.2   | gamma-glutamyl kinase (glutamate 5-kinase) (EC 2.7.2.11)                                                                                    |
| ACHSKI-659 | GK2049 | 2094327 | 2095571 | 2.2   | gamma-glutamyl phosphate reductase (glutamate-5-semialdehyde dehydrogenase) (EC 1.2.1.41)                                                   |
| ACHSKI-660 | GK2056 | 2101952 | 2102518 | 2.2   | shikimate kinase (EC 2.7.1.71)                                                                                                              |
| ACHSKI-661 | GK2067 | 2111023 | 2111319 | 5     | unknown conserved protein                                                                                                                   |
| ACHSKI-662 | GK2080 | 2119206 | 2119913 | 1.4   | cytochrome c biogenesis protein                                                                                                             |
| ACHSKI-663 | GK2082 | 2121043 | 2122302 | 5     | unknown conserved protein                                                                                                                   |
| ACHSKI-664 | GK2083 | 2122872 | 2123900 | 1.4   | cytochrome bd-type ubiquinol oxidase subunit II                                                                                             |
| ACHSKI-665 | GK2084 | 2123897 | 2125243 | 1.4   | cytochrome bd-type ubiquinol oxidase subunit I                                                                                              |
| ACHSKI-666 | GK2128 | 2168777 | 2169949 | 2.5   | 8-amino-7-oxononanoate synthase (EC 2.3.1.47)                                                                                               |
| ACHSKI-667 | GK2140 | 2180874 | 2182115 | 2.2   | leucyl aminopeptidase II (EC 3.4.11.1)                                                                                                      |
| ACHSKI-668 | GK2151 | 2198845 | 2199627 | 5     | unknown conserved protein                                                                                                                   |
| ACHSKI-669 | GK2153 | 2201987 | 2203645 | 2.1.1 | glycerol-3-phosphate dehydrogenase (EC 1.1.99.5)                                                                                            |
| ACHSKI-670 | GK2154 | 2203804 | 2204358 | 3.5.2 | transcriptional antiterminator of glycerol uptake operon                                                                                    |
| ACHSKI-671 | GK2156 | 2204547 | 2205944 | 1.3   | two-component sensor histidine kinase                                                                                                       |
| ACHSKI-672 | GK2157 | 2205941 | 2206615 | 3.5.2 | two-component response regulator                                                                                                            |
| ACHSKI-673 | GK2165 | 2209697 | 2210080 | 5     | unknown conserved protein                                                                                                                   |
| ACHSKI-674 | GK2167 | 2210664 | 2211266 | 3.3   | recombination protein U (penicillin-binding protein related factor A)                                                                       |
| ACHSKI-675 | GK2168 | 2211300 | 2213990 | 1.1   | penicillin-binding protein 1A/1B (PBP1) (penicillin-insensitive transglycosylase (peptidoglycan TGase); penicillin-sensitive transpeptidase |
| ACHSKI-676 | GK2169 | 2214094 | 2214765 | 3.2   | endonuclease III (DNA-(apurinic or apyrimidinic site) lyase)                                                                                |
| ACHSKI-677 | GK2170 | 2214869 | 2215570 | 3.1   | chromosome replication initiation protein                                                                                                   |
| ACHSKI-678 | GK2171 | 2215638 | 2216933 | 3.7.2 | asparaginyl-tRNA synthetase (EC 6.1.1.22)                                                                                                   |
| ACHSKI-679 | GK2172 | 2217161 | 2218342 | 2.2   | aspartate transaminase (transaminase A) (EC 2.6.1.1)                                                                                        |
| ACHSKI-680 | GK2173 | 2218364 | 2218840 | 5     | unknown conserved protein                                                                                                                   |
| ACHSKI-681 | GK2177 | 2222130 | 2222513 | 2.5   | aspartate 1-decarboxylase precursor (aspartate alpha-decarboxylase) (EC 4.1.1.11)                                                           |
| ACHSKI-682 | GK2178 | 2222495 | 2223397 | 2.5   | pantothenate synthetase (pantoate--beta-alanine ligase) (EC 6.3.2.1)                                                                        |
| ACHSKI-683 | GK2179 | 2223394 | 2224233 | 2.5   | ketopantoate hydroxymethyltransferase (3-methyl-2-oxobutanoate hydroxymethyltransferase) (EC 2.1.2.11)                                      |
| ACHSKI-684 | GK2180 | 2224500 | 2225489 | 3.5.2 | biotin [acetyl-CoA carboxylase] synthetase (EC 6.3.4.15) ; transcriptional repressor of the biotin operon                                   |
| ACHSKI-685 | GK2181 | 2225447 | 2226661 | 3.6   | tRNA nucleotidyltransferase (EC 2.7.7.19)                                                                                                   |
| ACHSKI-686 | GK2182 | 2226658 | 2227794 | 5     | unknown conserved protein                                                                                                                   |
| ACHSKI-687 | GK2184 | 2228507 | 2228941 | 2.1.1 | methylglyoxal synthase (EC 4.2.99.11)                                                                                                       |

|            |        |         |         |       |                                                                                                                          |
|------------|--------|---------|---------|-------|--------------------------------------------------------------------------------------------------------------------------|
| ACHSKI-688 | GK2185 | 2228973 | 2229770 | 2.2   | dihydrodipicolinate reductase                                                                                            |
| ACHSKI-689 | GK2186 | 2229767 | 2230102 | 5     | unknown conserved protein                                                                                                |
| ACHSKI-690 | GK2187 | 2230262 | 2231134 | 5     | unknown conserved protein                                                                                                |
| ACHSKI-691 | GK2189 | 2232411 | 2233031 | 5     | unknown conserved protein                                                                                                |
| ACHSKI-692 | GK2190 | 2233110 | 2233874 | 1.4   | menaquinol-cytochrome-c reductase (EC 1.10.2.-) cytochrome b/c subunit                                                   |
| ACHSKI-693 | GK2191 | 2233924 | 2234598 | 1.4   | menaquinol-cytochrome-c reductase (EC 1.10.2.-) cytochrome b subunit                                                     |
| ACHSKI-694 | GK2192 | 2234602 | 2235111 | 1.4   | menaquinol-cytochrome-c reductase (EC 1.10.2.-) iron-sulfur subunit (Rieske iron-sulfur protein)                         |
| ACHSKI-695 | GK2193 | 2235256 | 2235711 | 5     | unknown conserved protein                                                                                                |
| ACHSKI-696 | GK2194 | 2235729 | 2236334 | 5     | unknown conserved protein                                                                                                |
| ACHSKI-697 | GK2195 | 2236391 | 2237647 | 5     | unknown conserved protein                                                                                                |
| ACHSKI-698 | GK2196 | 2237918 | 2239201 | 2.2   | 3-phosphoshikimate 1-carboxyvinyltransferase (5-enolpyruvylshikimate-3-phosphate synthase) (EPSP synthase) (EC 2.5.1.19) |
| ACHSKI-699 | GK2197 | 2239229 | 2240341 | 2.2   | prephenate dehydrogenase (EC 1.3.1.12)                                                                                   |
| ACHSKI-700 | GK2198 | 2240420 | 2241517 | 2.2   | histidinol-phosphate aminotransferase(EC 2.6.1.9); tyrosine/phenylalanine aminotransferase (EC 2.6.1.5)                  |
| ACHSKI-701 | GK2199 | 2241549 | 2242355 | 2.2   | tryptophan synthase (EC 4.2.1.20) alpha chain                                                                            |
| ACHSKI-702 | GK2200 | 2242339 | 2243556 | 2.2   | tryptophan synthase (EC 4.2.1.20) beta chain                                                                             |
| ACHSKI-703 | GK2201 | 2243903 | 2244547 | 2.2   | phosphoribosyl anthranilate isomerase (EC 5.3.1.24)                                                                      |
| ACHSKI-704 | GK2202 | 2244534 | 2245310 | 2.2   | indole-3-glycerol-phosphate synthase (EC 4.1.1.48)                                                                       |
| ACHSKI-705 | GK2203 | 2245303 | 2246322 | 2.2   | anthranilate phosphoribosyltransferase (EC 2.4.2.18)                                                                     |
| ACHSKI-706 | GK2204 | 2246316 | 2247842 | 2.2   | anthranilate synthase (EC 4.1.3.27) component I                                                                          |
| ACHSKI-707 | GK2206 | 2248454 | 2249554 | 2.2   | 3-dehydroquinate synthase (EC 4.2.3.4)                                                                                   |
| ACHSKI-708 | GK2207 | 2249557 | 2250723 | 2.2   | chorismate synthase (5-enolpyruvylshikimate-3-phosphate phospholyase) (EC 4.2.3.5)                                       |
| ACHSKI-709 | GK2208 | 2250823 | 2251593 | 1.5   | chemotactic methyltransferase (EC 2.1.1.-)                                                                               |
| ACHSKI-710 | GK2209 | 2251666 | 2252115 | 2.3   | nucleoside-diphosphate kinase (EC 2.7.4.6)                                                                               |
| ACHSKI-711 | GK2210 | 2252214 | 2253176 | 2.5   | heptaprenyl diphosphate synthase component II (spore germination protein C3)                                             |
| ACHSKI-712 | GK2211 | 2253192 | 2253896 | 2.5   | 2-heptaprenyl-1,4-naphthoquinone methyltransferase (menaquinone biosynthesis methyltransferase)                          |
| ACHSKI-713 | GK2212 | 2253901 | 2254692 | 2.5   | heptaprenyl diphosphate synthase component I (spore germination protein C1)                                              |
| ACHSKI-714 | GK2215 | 2255728 | 2256000 | 3.4   | DNA-binding protein HU (DNA-binding protein II)                                                                          |
| ACHSKI-715 | GK2217 | 2256773 | 2258251 | 1.8   | stage IV sporulation protein A (spore cortex formation and coat assembly)                                                |
| ACHSKI-716 | GK2218 | 2258408 | 2259130 | 5     | unknown conserved protein                                                                                                |
| ACHSKI-717 | GK2220 | 2259532 | 2260566 | 2.1.1 | NAD(P)H-dependent glycerol-3-phosphate dehydrogenase (EC 1.1.1.8)                                                        |
| ACHSKI-718 | GK2221 | 2260776 | 2262086 | 4.6   | GTP-binding protein                                                                                                      |
| ACHSKI-719 | GK2223 | 2262470 | 2263372 | 5     | unknown conserved protein                                                                                                |
| ACHSKI-720 | GK2225 | 2264403 | 2265566 | 3.7.1 | 30S ribosomal protein S1                                                                                                 |
| ACHSKI-721 | GK2226 | 2265746 | 2266339 | 2.4   | 1-acylglycerol-3-phosphate O-acyltransferase (EC 2.3.1.51)                                                               |
| ACHSKI-722 | GK2227 | 2266336 | 2267010 | 2.3   | cytidylate kinase (cytidine monophosphate kinase)                                                                        |
| ACHSKI-723 | GK2230 | 2268165 | 2269505 | 1.8   | sporulation protein                                                                                                      |
| ACHSKI-724 | GK2231 | 2269524 | 2270318 | 1.9   | sporulation specific N-acetylmuramoyl-L-alanine amidase (spore cortex-lytic enzyme) (EC 3.5.1.28)                        |
| ACHSKI-725 | GK2233 | 2271175 | 2272146 | 2.2   | L-asparaginase (L-asparagine amidohydrolase) (EC 3.5.1.1)                                                                |
| ACHSKI-726 | GK2234 | 2272365 | 2273357 | 1.4   | thioredoxin reductase                                                                                                    |
| ACHSKI-727 | GK2235 | 2273447 | 2274718 | 2.2   | NAD-specific glutamate dehydrogenase (NAD-GDH)                                                                           |
| ACHSKI-728 | GK2236 | 2274879 | 2275469 | 1.10  | negative regulator of competence                                                                                         |
| ACHSKI-729 | GK2242 | 2278312 | 2278896 | 5     | unknown conserved protein                                                                                                |
| ACHSKI-730 | GK2243 | 2278880 | 2280403 | 3.3   | ATP-dependent DNA helicase                                                                                               |
| ACHSKI-731 | GK2244 | 2280391 | 2281437 | 5     | unknown conserved protein                                                                                                |
| ACHSKI-732 | GK2247 | 2282870 | 2284402 | 2.2   | phosphoglycerate dehydrogenase (EC 1.1.1.95)                                                                             |
| ACHSKI-733 | GK2248 | 2284664 | 2285476 | 2.2   | histidinol phosphatase (EC 3.1.3.15)                                                                                     |
| ACHSKI-734 | GK2257 | 2291967 | 2292545 | 5     | unknown conserved protein                                                                                                |
| ACHSKI-735 | GK2275 | 2308824 | 2309555 | 3.5.2 | transcriptional regulator (GntR family)                                                                                  |
| ACHSKI-736 | GK2276 | 2309552 | 2310313 | 2.1.1 | N-acetylglucosamine-6-phosphate isomerase (EC 3.5.99.6)                                                                  |
| ACHSKI-737 | GK2277 | 2310304 | 2311506 | 2.1.1 | N-acetylglucosamine-6-phosphate deacetylase (EC 3.5.1.25)                                                                |
| ACHSKI-738 | GK2278 | 2311646 | 2313439 | 1.3   | two-component sensor histidine kinase                                                                                    |
| ACHSKI-739 | GK2279 | 2313439 | 2314164 | 3.5.2 | two-component response regulator                                                                                         |
| ACHSKI-740 | GK2280 | 2314261 | 2315448 | 1.4   | cytochrome c biogenesis protein                                                                                          |

|            |        |         |         |       |                                                                                                                                   |
|------------|--------|---------|---------|-------|-----------------------------------------------------------------------------------------------------------------------------------|
| ACHSKI-741 | GK2281 | 2315435 | 2317099 | 1.4   | cytochrome c biogenesis protein                                                                                                   |
| ACHSKI-742 | GK2282 | 2317113 | 2317637 | 1.4   | thioredoxin (cytochrome c biogenesis)                                                                                             |
| ACHSKI-743 | GK2284 | 2318644 | 2319177 | 1.8   | spore maturation protein                                                                                                          |
| ACHSKI-744 | GK2285 | 2319177 | 2319773 | 1.8   | spore maturation protein                                                                                                          |
| ACHSKI-745 | GK2286 | 2319766 | 2320914 | 1.1   | D-alanyl-D-alanine carboxypeptidase (EC 3.4.16.4)                                                                                 |
| ACHSKI-746 | GK2290 | 2323355 | 2324008 | 5     | unknown conserved protein                                                                                                         |
| ACHSKI-747 | GK2291 | 2324184 | 2325098 | 5     | unknown conserved protein                                                                                                         |
| ACHSKI-748 | GK2293 | 2325696 | 2326052 | 5     | unknown conserved protein                                                                                                         |
| ACHSKI-749 | GK2294 | 2326173 | 2326637 | 2.5   | riboflavin synthase beta subunit (EC 2.5.1.9)                                                                                     |
| ACHSKI-750 | GK2295 | 2326658 | 2327854 | 2.5   | GTP cyclohydrolase II (EC 3.5.4.25); 3,4-dihydroxy-2-butanone 4-phosphate synthase (EC 5.4.99.-)                                  |
| ACHSKI-751 | GK2296 | 2327872 | 2328516 | 2.5   | riboflavin synthase alpha subunit (EC 2.5.1.9)                                                                                    |
| ACHSKI-752 | GK2297 | 2328471 | 2329613 | 2.5   | riboflavin-specific deaminase (EC 3.5.4.26); 5-amino-6-(5-phosphoribosylamino)uracil reductase (EC 1.1.1.193)                     |
| ACHSKI-753 | GK2298 | 2330115 | 2330555 | 3.8   | peptidyl-prolyl cis-trans isomerase (rotamase) (EC 5.2.1.8)                                                                       |
| ACHSKI-754 | GK2299 | 2330741 | 2331619 | 5     | unknown conserved protein                                                                                                         |
| ACHSKI-755 | GK2300 | 2331691 | 2333010 | 2.2   | diaminopimelate decarboxylase (EC 4.1.1.20)                                                                                       |
| ACHSKI-756 | GK2301 | 2333324 | 2334802 | 1.8   | stage V sporulation protein AF                                                                                                    |
| ACHSKI-757 | GK2308 | 2338646 | 2339398 | 3.5.1 | RNA polymerase sporulation-specific sigma factor (sigma-F) (Stage II sporulation protein AC)                                      |
| ACHSKI-758 | GK2309 | 2339412 | 2339852 | 1.8   | anti-sigma F factor (serine kinase) (stage II sporulation factor AB)                                                              |
| ACHSKI-759 | GK2310 | 2339853 | 2340203 | 1.8   | anti-sigma F factor antagonist (stage II sporulation protein AA)                                                                  |
| ACHSKI-760 | GK2311 | 2340329 | 2341504 | 1.1   | D-alanyl-D-alanine carboxypeptidase (penicillin binding protein) (EC 3.4.16.4)                                                    |
| ACHSKI-761 | GK2312 | 2341671 | 2342972 | 2.3   | pyrimidine-nucleoside phosphorylase (PYNP) (EC 2.4.2.2)                                                                           |
| ACHSKI-762 | GK2313 | 2342978 | 2343814 | 2.3   | purine nucleoside phosphorylase (PNP) (EC 2.4.2.1)                                                                                |
| ACHSKI-763 | GK2314 | 2343844 | 2345031 | 2.3   | phosphopentomutase (EC 5.4.2.7)                                                                                                   |
| ACHSKI-764 | GK2315 | 2345163 | 2346059 | 4.4   | integrase/recombinase                                                                                                             |
| ACHSKI-765 | GK2317 | 2346379 | 2346831 | 3.5.2 | transcriptional regulator (Fur family) (ferric uptake regulator)                                                                  |
| ACHSKI-766 | GK2318 | 2346929 | 2347594 | 1.8   | stage II sporulation protein M                                                                                                    |
| ACHSKI-767 | GK2320 | 2348994 | 2349557 | 2.1.1 | ADP-ribose pyrophosphatase (EC 3.6.1.13)                                                                                          |
| ACHSKI-768 | GK2321 | 2349676 | 2350596 | 5     | unknown conserved protein                                                                                                         |
| ACHSKI-769 | GK2331 | 2355970 | 2356869 | 2.2   | pyrroline-5-carboxylate reductase (EC 1.5.1.2)                                                                                    |
| ACHSKI-770 | GK2332 | 2357010 | 2358032 | 1.4   | NADH-dependent flavin oxidoreductase                                                                                              |
| ACHSKI-771 | GK2333 | 2358029 | 2358952 | 5     | unknown conserved protein                                                                                                         |
| ACHSKI-772 | GK2340 | 2367169 | 2367855 | 3.5.2 | two-component response regulator                                                                                                  |
| ACHSKI-773 | GK2341 | 2367855 | 2368859 | 1.3   | two-component sensor histidine kinase                                                                                             |
| ACHSKI-774 | GK2342 | 2368953 | 2369708 | 1.2   | ABC transporter (ATP-binding protein)                                                                                             |
| ACHSKI-775 | GK2343 | 2369705 | 2371630 | 1.2   | ABC transporter (permease)                                                                                                        |
| ACHSKI-776 | GK2344 | 2371796 | 2373205 | 2.1.2 | 6-phosphogluconate dehydrogenase (EC 1.1.1.44)                                                                                    |
| ACHSKI-777 | GK2347 | 2374241 | 2375365 | 2.2   | tripeptidase                                                                                                                      |
| ACHSKI-778 | GK2350 | 2377476 | 2377898 | 4.6   | lactoylglutathione lyase (EC 4.4.1.5)                                                                                             |
| ACHSKI-779 | GK2353 | 2378818 | 2379792 | 5     | unknown conserved protein                                                                                                         |
| ACHSKI-780 | GK2368 | 2396025 | 2396462 | 5     | unknown conserved protein                                                                                                         |
| ACHSKI-781 | GK2376 | 2406113 | 2407456 | 2.4   | branched-chain alpha-keto acid dehydrogenase E2 subunit (lipoamide acyltransferase) (EC 2.3.1.-)                                  |
| ACHSKI-782 | GK2377 | 2407634 | 2408617 | 2.4   | branched-chain alpha-keto acid dehydrogenase E1 component beta chain (2-oxoisovalerate dehydrogenase beta subunit) (EC 1.2.4.4)   |
| ACHSKI-783 | GK2378 | 2408631 | 2409626 | 2.4   | branched-chain alpha-keto acid dehydrogenase E1 component alpha chain (2-oxoisovalerate dehydrogenase alpha subunit) (EC 1.2.4.4) |
| ACHSKI-784 | GK2379 | 2409696 | 2411117 | 2.4   | branched-chain alpha-keto acid dehydrogenase E3 component (dihydrolipoamide dehydrogenase) (EC 1.8.1.4)                           |
| ACHSKI-785 | GK2381 | 2412316 | 2413419 | 2.4   | leucine dehydrogenase (EC 1.4.1.9)                                                                                                |
| ACHSKI-786 | GK2383 | 2414484 | 2416547 | 3.5.2 | sigma L-dependent transcriptional regulator                                                                                       |
| ACHSKI-787 | GK2385 | 2417011 | 2417739 | 2.4   | glycerophosphodiester phosphodiesterase                                                                                           |
| ACHSKI-788 | GK2387 | 2418153 | 2418932 | 3.5.2 | stage 0 sporulation protein A (two-component response regulator)                                                                  |
| ACHSKI-789 | GK2388 | 2419356 | 2420651 | 1.8   | stage IV sporulation protein B                                                                                                    |
| ACHSKI-790 | GK2390 | 2422773 | 2423222 | 3.5.2 | arginine repressor                                                                                                                |
| ACHSKI-791 | GK2391 | 2423279 | 2424127 | 5     | unknown conserved protein                                                                                                         |
| ACHSKI-792 | GK2393 | 2426271 | 2427164 | 2.4   | geranyltranstransferase (farnesyl-diphosphate synthase) (EC 2.5.1.10)                                                             |
| ACHSKI-793 | GK2394 | 2427168 | 2427380 | 2.3   | exodeoxyribonuclease VII small subunit (exonuclease VII small subunit) (EC 3.1.11.6)                                              |

|            |        |         |         |       |                                                                                                                           |
|------------|--------|---------|---------|-------|---------------------------------------------------------------------------------------------------------------------------|
| ACHSKI-794 | GK2395 | 2427395 | 2428741 | 2.3   | exodeoxyribonuclease VII large subunit (EC 3.1.11.6)                                                                      |
| ACHSKI-795 | GK2396 | 2428753 | 2429607 | 2.5   | methylenetetrahydrofolate dehydrogenase (EC 1.5.1.5); methenyltetrahydrofolate cyclohydrolase (EC 3.5.4.9)                |
| ACHSKI-796 | GK2397 | 2429667 | 2430059 | 3.5.4 | transcription termination factor                                                                                          |
| ACHSKI-797 | GK2398 | 2430252 | 2430653 | 5     | unknown conserved protein                                                                                                 |
| ACHSKI-798 | GK2399 | 2430664 | 2432019 | 2.4   | acetyl-CoA carboxylase subunit (biotin carboxylase subunit) (EC 6.4.1.2)                                                  |
| ACHSKI-799 | GK2400 | 2432035 | 2432568 | 2.4   | acetyl-CoA carboxylase subunit (biotin carboxyl carrier subunit)                                                          |
| ACHSKI-800 | GK2401 | 2432713 | 2433264 | 1.8   | stage III sporulation protein AH                                                                                          |
| ACHSKI-801 | GK2402 | 2433288 | 2433920 | 1.8   | stage III sporulation protein AG                                                                                          |
| ACHSKI-802 | GK2403 | 2433928 | 2434539 | 1.8   | stage III sporulation protein AF                                                                                          |
| ACHSKI-803 | GK2404 | 2434550 | 2435713 | 1.8   | stage III sporulation protein AE                                                                                          |
| ACHSKI-804 | GK2405 | 2435727 | 2436113 | 1.8   | stage III sporulation protein AD                                                                                          |
| ACHSKI-805 | GK2406 | 2436135 | 2436341 | 1.8   | stage III sporulation protein AC                                                                                          |
| ACHSKI-806 | GK2407 | 2436357 | 2436869 | 1.8   | stage III sporulation protein AB                                                                                          |
| ACHSKI-807 | GK2408 | 2436866 | 2437786 | 1.8   | stage III sporulation protein AA                                                                                          |
| ACHSKI-808 | GK2410 | 2438306 | 2438863 | 3.7.4 | translation elongation factor P                                                                                           |
| ACHSKI-809 | GK2411 | 2438891 | 2439952 | 3.8   | Xaa-Pro dipeptidase                                                                                                       |
| ACHSKI-810 | GK2412 | 2440213 | 2440743 | 5     | unknown conserved protein                                                                                                 |
| ACHSKI-811 | GK2414 | 2441888 | 2442244 | 5     | unknown conserved protein                                                                                                 |
| ACHSKI-812 | GK2415 | 2442323 | 2443204 | 5     | unknown conserved protein                                                                                                 |
| ACHSKI-813 | GK2416 | 2443292 | 2443717 | 3.5.2 | transcriptional regulator (manganese transport regulator)                                                                 |
| ACHSKI-814 | GK2420 | 2449150 | 2449986 | 2.4   | lipoate protein ligase                                                                                                    |
| ACHSKI-815 | GK2421 | 2450196 | 2450570 | 5     | unknown conserved protein                                                                                                 |
| ACHSKI-816 | GK2423 | 2452128 | 2453624 | 2.2   | glycine cleavage system P-protein, glycine dehydrogenase [decarboxylating] subunit 2 (Glycine decarboxylase) (EC 1.4.4.2) |
| ACHSKI-817 | GK2424 | 2453593 | 2454939 | 2.2   | glycine cleavage system P-protein, glycine dehydrogenase [decarboxylating] subunit 1 (Glycine decarboxylase) (EC 1.4.4.2) |
| ACHSKI-818 | GK2425 | 2454975 | 2456069 | 2.2   | glycine cleavage system T protein, aminomethyltransferase (EC 2.1.2.10)                                                   |
| ACHSKI-819 | GK2426 | 2456564 | 2458228 | 3.3   | DNA/RNA helicases (SNF2 family)                                                                                           |
| ACHSKI-820 | GK2427 | 2458215 | 2459009 | 5     | unknown conserved protein                                                                                                 |
| ACHSKI-821 | GK2428 | 2459112 | 2459291 | 5     | unknown conserved protein                                                                                                 |
| ACHSKI-822 | GK2432 | 2460536 | 2460973 | 5     | unknown conserved protein                                                                                                 |
| ACHSKI-823 | GK2433 | 2460963 | 2461259 | 1.10  | DNA transport machinery (exogenous DNA-binding protein)                                                                   |
| ACHSKI-824 | GK2434 | 2461462 | 2462478 | 1.10  | DNA transport machinery                                                                                                   |
| ACHSKI-825 | GK2435 | 2462487 | 2463560 | 1.10  | DNA transport machinery                                                                                                   |
| ACHSKI-826 | GK2437 | 2464610 | 2464852 | 5     | unknown conserved protein                                                                                                 |
| ACHSKI-827 | GK2439 | 2466391 | 2467023 | 5     | unknown conserved protein                                                                                                 |
| ACHSKI-828 | GK2442 | 2468749 | 2469702 | 2.1.1 | glucokinase (EC 2.7.1.2)                                                                                                  |
| ACHSKI-829 | GK2449 | 2474876 | 2475448 | 2.5   | 5-formyltetrahydrofolate cyclo-ligase                                                                                     |
| ACHSKI-830 | GK2454 | 2478466 | 2479284 | 1.2   | ABC transporter (ATP-binding protein) phosphate                                                                           |
| ACHSKI-831 | GK2455 | 2479606 | 2481720 | 1.1   | peptidoglycan biosynthesis (penicillin-binding protein 2A)                                                                |
| ACHSKI-832 | GK2456 | 2481793 | 2483085 | 5     | unknown conserved protein                                                                                                 |
| ACHSKI-833 | GK2457 | 2483228 | 2483842 | 4.2   | manganese superoxide dismutase (EC 1.15.1.1)                                                                              |
| ACHSKI-834 | GK2460 | 2484990 | 2485763 | 5     | unknown conserved protein                                                                                                 |
| ACHSKI-835 | GK2461 | 2485802 | 2486725 | 1.2   | ABC transporter (permease) phosphate                                                                                      |
| ACHSKI-836 | GK2462 | 2486727 | 2487623 | 1.2   | ABC transporter (permease) phosphate                                                                                      |
| ACHSKI-837 | GK2463 | 2487680 | 2488570 | 1.2   | ABC transporter (phosphate-binding protein)                                                                               |
| ACHSKI-838 | GK2465 | 2488870 | 2489184 | 5     | unknown conserved protein                                                                                                 |
| ACHSKI-839 | GK2467 | 2490449 | 2490796 | 5     | unknown conserved protein                                                                                                 |
| ACHSKI-840 | GK2469 | 2491498 | 2491917 | 3.5.2 | transcriptional regulator (Fur family)                                                                                    |
| ACHSKI-841 | GK2470 | 2491914 | 2492747 | 1.2   | ABC transporter (permease) metal (zinc)                                                                                   |
| ACHSKI-842 | GK2471 | 2492773 | 2493540 | 1.2   | ABC transporter (ATP-binding protein) metal (zinc)                                                                        |
| ACHSKI-843 | GK2473 | 2494600 | 2494860 | 5     | unknown conserved protein                                                                                                 |
| ACHSKI-844 | GK2474 | 2494881 | 2495780 | 3.2   | endonuclease IV                                                                                                           |
| ACHSKI-845 | GK2475 | 2495822 | 2497132 | 3.6   | ATP-dependent RNA helicase                                                                                                |
| ACHSKI-846 | GK2478 | 2499214 | 2500335 | 5     | unknown conserved protein                                                                                                 |



|            |        |         |         |       |                                                                                                                                 |
|------------|--------|---------|---------|-------|---------------------------------------------------------------------------------------------------------------------------------|
| ACHSKI-847 | GK2479 | 2500332 | 2501036 | 5     | unknown conserved protein                                                                                                       |
| ACHSKI-848 | GK2480 | 2501181 | 2501543 | 1.4   | cytochrome c                                                                                                                    |
| ACHSKI-849 | GK2482 | 2502241 | 2503368 | 3.5.1 | RNA polymerase major sigma-43 factor (sigma-A)                                                                                  |
| ACHSKI-850 | GK2483 | 2503403 | 2505199 | 3.1   | DNA primase (EC 2.7.7.-)                                                                                                        |
| ACHSKI-851 | GK2484 | 2505733 | 2506533 | 5     | unknown conserved protein                                                                                                       |
| ACHSKI-852 | GK2485 | 2506556 | 2507149 | 5     | unknown conserved protein                                                                                                       |
| ACHSKI-853 | GK2486 | 2507252 | 2508040 | 3.3   | DNA repair protein (recombination protein O)                                                                                    |
| ACHSKI-854 | GK2488 | 2508317 | 2509225 | 4.6   | GTP-binding protein                                                                                                             |
| ACHSKI-855 | GK2489 | 2509218 | 2509640 | 2.3   | cytidine deaminase (EC 3.5.4.5)                                                                                                 |
| ACHSKI-856 | GK2490 | 2509740 | 2510093 | 2.4   | diacylglycerol kinase (EC 2.7.1.107)                                                                                            |
| ACHSKI-857 | GK2491 | 2510093 | 2510563 | 5     | unknown conserved protein                                                                                                       |
| ACHSKI-858 | GK2492 | 2510560 | 2512662 | 5     | unknown conserved protein                                                                                                       |
| ACHSKI-859 | GK2493 | 2512712 | 2513674 | 2.6   | phosphate starvation-induced protein                                                                                            |
| ACHSKI-860 | GK2494 | 2513677 | 2514864 | 1.8   | stage IV sporulation protein                                                                                                    |
| ACHSKI-861 | GK2495 | 2514880 | 2515167 | 5     | unknown conserved protein                                                                                                       |
| ACHSKI-862 | GK2496 | 2515266 | 2515712 | 5     | unknown conserved protein                                                                                                       |
| ACHSKI-863 | GK2497 | 2515742 | 2515915 | 3.7.1 | 30S ribosomal protein S21                                                                                                       |
| ACHSKI-864 | GK2498 | 2516100 | 2517035 | 1.2   | Na <sup>+</sup> :phosphate symporter                                                                                            |
| ACHSKI-865 | GK2499 | 2517032 | 2517853 | 2.3   | deoxyribose-phosphate aldolase (EC 4.1.2.4)                                                                                     |
| ACHSKI-866 | GK2500 | 2517841 | 2519190 | 5     | unknown conserved protein                                                                                                       |
| ACHSKI-867 | GK2501 | 2519267 | 2520043 | 5     | unknown conserved protein                                                                                                       |
| ACHSKI-868 | GK2502 | 2520061 | 2520999 | 3.8   | ribosomal protein L11 methyltransferase (EC 2.1.1.-)                                                                            |
| ACHSKI-869 | GK2503 | 2521005 | 2522153 | 4.1   | chaperone protein (heat shock protein)                                                                                          |
| ACHSKI-870 | GK2504 | 2522283 | 2524106 | 3.9   | chaperone protein (heat shock protein 70) (HSP70)                                                                               |
| ACHSKI-871 | GK2505 | 2524130 | 2524771 | 4.1   | chaperone protein (heat shock protein) (HSP-70 cofactor)                                                                        |
| ACHSKI-872 | GK2506 | 2524870 | 2525904 | 3.5.2 | transcription repressor of class I heat shock genes                                                                             |
| ACHSKI-873 | GK2507 | 2525988 | 2527127 | 2.5   | coproporphyrinogen III oxidase (EC 1.3.3.3)                                                                                     |
| ACHSKI-874 | GK2508 | 2527202 | 2529031 | 4.6   | GTP-binding protein                                                                                                             |
| ACHSKI-875 | GK2510 | 2529640 | 2530839 | 1.8   | stage II sporulation protein P (septal wall dissolution protein)                                                                |
| ACHSKI-876 | GK2511 | 2530914 | 2532032 | 1.9   | spore protease (germination protease precursor) (EC 3.4.99.-)                                                                   |
| ACHSKI-877 | GK2512 | 2532216 | 2532485 | 3.7.1 | 30S ribosomal protein S20                                                                                                       |
| ACHSKI-878 | GK2513 | 2532557 | 2533603 | 5     | unknown conserved protein                                                                                                       |
| ACHSKI-879 | GK2515 | 2534094 | 2536343 | 1.10  | late competence protein (DNA uptake)                                                                                            |
| ACHSKI-880 | GK2516 | 2536340 | 2536810 | 1.10  | late competence protein (DNA binding and uptake)                                                                                |
| ACHSKI-881 | GK2517 | 2536940 | 2537563 | 1.10  | late competence protein (DNA binding and uptake)                                                                                |
| ACHSKI-882 | GK2519 | 2538856 | 2539599 | 5     | unknown conserved protein                                                                                                       |
| ACHSKI-883 | GK2520 | 2539596 | 2539952 | 5     | unknown conserved protein                                                                                                       |
| ACHSKI-884 | GK2521 | 2539949 | 2540527 | 5     | unknown conserved protein                                                                                                       |
| ACHSKI-885 | GK2522 | 2540436 | 2541086 | 2.5   | nicotinate-nucleotide adenyllyltransferase (EC 2.7.7.18)                                                                        |
| ACHSKI-886 | GK2523 | 2541126 | 2541419 | 5     | unknown conserved protein                                                                                                       |
| ACHSKI-887 | GK2524 | 2541423 | 2542253 | 2.2   | shikimate 5-dehydrogenase (EC 1.1.1.25)                                                                                         |
| ACHSKI-888 | GK2525 | 2542276 | 2543385 | 5     | unknown conserved protein                                                                                                       |
| ACHSKI-889 | GK2526 | 2543388 | 2543903 | 5     | unknown conserved protein                                                                                                       |
| ACHSKI-890 | GK2527 | 2544231 | 2544371 | 5     | unknown conserved protein                                                                                                       |
| ACHSKI-891 | GK2534 | 2549860 | 2551128 | 1.2   | proton/sodium:glutamate symporter                                                                                               |
| ACHSKI-892 | GK2542 | 2555732 | 2556439 | 2.3   | nucleoside phosphorylase ( 5'-methylthioadenosine nucleosidase (EC 3.2.2.16); S-adenosylhomocysteine nucleosidase (EC 3.2.2.9)) |
| ACHSKI-893 | GK2545 | 2557615 | 2558280 | 5     | unknown conserved protein                                                                                                       |
| ACHSKI-894 | GK2547 | 2560198 | 2560674 | 3.5.3 | transcription elongation factor                                                                                                 |
| ACHSKI-895 | GK2548 | 2560785 | 2561420 | 2.3   | uridine kinase (EC 2.7.1.48)                                                                                                    |
| ACHSKI-896 | GK2551 | 2563635 | 2564288 | 2.5   | caffeoyl-CoA O-methyltransferase                                                                                                |
| ACHSKI-897 | GK2552 | 2564726 | 2565817 | 5     | unknown conserved protein                                                                                                       |
| ACHSKI-898 | GK2553 | 2566060 | 2566359 | 5     | unknown conserved protein                                                                                                       |
| ACHSKI-899 | GK2554 | 2566375 | 2566791 | 5     | unknown conserved protein                                                                                                       |

|            |        |         |         |       |                                                                                |
|------------|--------|---------|---------|-------|--------------------------------------------------------------------------------|
| ACHSKI-900 | GK2555 | 2566796 | 2567062 | 5     | unknown conserved protein                                                      |
| ACHSKI-901 | GK2556 | 2567130 | 2569793 | 3.7.2 | alanyl-tRNA synthetase (EC 6.1.1.7)                                            |
| ACHSKI-902 | GK2557 | 2570112 | 2571173 | 5     | unknown conserved protein                                                      |
| ACHSKI-903 | GK2561 | 2572144 | 2574504 | 3.3   | ATP-dependent exonuclease V                                                    |
| ACHSKI-904 | GK2562 | 2574524 | 2575186 | 5     | unknown conserved protein                                                      |
| ACHSKI-905 | GK2563 | 2575277 | 2576392 | 3.6   | tRNA (5-methylaminomethyl-2-thiouridylate)-methyltransferase (EC 2.1.1.61)     |
| ACHSKI-906 | GK2564 | 2576407 | 2577549 | 4.6   | iron-sulfur cofactor synthesis                                                 |
| ACHSKI-907 | GK2565 | 2577577 | 2577993 | 5     | unknown conserved protein                                                      |
| ACHSKI-908 | GK2566 | 2578013 | 2578237 | 6     | unknown                                                                        |
| ACHSKI-909 | GK2567 | 2578278 | 2579573 | 5     | unknown conserved protein                                                      |
| ACHSKI-910 | GK2568 | 2579681 | 2580541 | 3.5.2 | transcriptional regulator (TetR/AcrR family)                                   |
| ACHSKI-911 | GK2569 | 2580639 | 2583686 | 5     | unknown conserved protein                                                      |
| ACHSKI-912 | GK2570 | 2583868 | 2584518 | 3.5.2 | transcriptional activator                                                      |
| ACHSKI-913 | GK2572 | 2585841 | 2587613 | 3.7.2 | aspartyl-tRNA synthetase (EC 6.1.1.12)                                         |
| ACHSKI-914 | GK2573 | 2587618 | 2588898 | 3.7.2 | histidyl-tRNA synthetase (EC 6.1.1.21)                                         |
| ACHSKI-915 | GK2577 | 2591974 | 2592432 | 3.7.2 | D-tyrosyl-tRNA(Tyr) deacylase                                                  |
| ACHSKI-916 | GK2578 | 2592456 | 2594654 | 2.3   | GTP pyrophosphokinase (ppGpp synthetase) (EC 2.7.6.5)                          |
| ACHSKI-917 | GK2579 | 2594803 | 2595315 | 2.3   | adenine phosphoribosyltransferase (EC 2.4.2.7)                                 |
| ACHSKI-918 | GK2580 | 2595350 | 2597671 | 3.3   | single-strand DNA-specific exonuclease                                         |
| ACHSKI-919 | GK2582 | 2598774 | 2601026 | 1.6   | preprotein translocase subunits D and F                                        |
| ACHSKI-920 | GK2583 | 2601139 | 2601471 | 5     | unknown conserved protein                                                      |
| ACHSKI-921 | GK2584 | 2601538 | 2603100 | 1.8   | stage V sporulation protein B (spore cortex synthesis)                         |
| ACHSKI-922 | GK2585 | 2603167 | 2603550 | 5     | unknown conserved protein                                                      |
| ACHSKI-923 | GK2586 | 2603714 | 2603986 | 5     | unknown conserved protein                                                      |
| ACHSKI-924 | GK2587 | 2604010 | 2605152 | 3.6   | tRNA-guanine transglycosylase (EC 2.4.2.29)                                    |
| ACHSKI-925 | GK2588 | 2605170 | 2606198 | 3.6   | S-adenosylmethionine tRNA ribosyltransferase (EC 5.4.99.-)                     |
| ACHSKI-926 | GK2591 | 2606821 | 2607822 | 3.3   | holliday junction DNA helicase                                                 |
| ACHSKI-927 | GK2592 | 2607848 | 2608432 | 3.3   | Holliday junction DNA helicase                                                 |
| ACHSKI-928 | GK2594 | 2609241 | 2609999 | 5     | unknown conserved protein                                                      |
| ACHSKI-929 | GK2596 | 2610970 | 2611710 | 2.5   | NH(3)-dependent NAD+ synthetase (EC 6.3.5.1)                                   |
| ACHSKI-930 | GK2598 | 2612673 | 2614229 | 6     | unknown                                                                        |
| ACHSKI-931 | GK2604 | 2619820 | 2620668 | 2.2   | prephenate dehydratase (EC 4.2.1.51)                                           |
| ACHSKI-932 | GK2606 | 2621150 | 2622448 | 1.8   | Spo0B-associated GTP-binding protein                                           |
| ACHSKI-933 | GK2607 | 2622672 | 2623220 | 1.8   | stage 0 sporulation protein B (sporulation initiation phosphoprotein)          |
| ACHSKI-934 | GK2608 | 2623392 | 2623682 | 3.7.1 | 50S ribosomal protein L27 (BL30)                                               |
| ACHSKI-935 | GK2609 | 2623698 | 2624027 | 5     | unknown conserved protein                                                      |
| ACHSKI-936 | GK2610 | 2624030 | 2624338 | 3.7.1 | 50S ribosomal protein L21                                                      |
| ACHSKI-937 | GK2611 | 2624820 | 2625668 | 1.8   | protease (stage IV sporulation protein FB)                                     |
| ACHSKI-938 | GK2612 | 2625673 | 2626440 | 1.8   | inhibitor of SpoIVFB (stage IV sporulation protein FA)                         |
| ACHSKI-939 | GK2613 | 2626704 | 2627507 | 1.7   | ATPase involved in chromosome partitioning                                     |
| ACHSKI-940 | GK2614 | 2627510 | 2628193 | 1.7   | septum formation inhibitor (cell-division inhibitor)                           |
| ACHSKI-941 | GK2615 | 2628243 | 2628761 | 1.1   | cell-shape determining protein                                                 |
| ACHSKI-942 | GK2616 | 2628758 | 2629624 | 1.1   | cell-shape determining protein                                                 |
| ACHSKI-943 | GK2617 | 2629644 | 2630666 | 1.1   | cell-shape determining protein                                                 |
| ACHSKI-944 | GK2618 | 2630824 | 2631504 | 3.2   | DNA repair protein                                                             |
| ACHSKI-945 | GK2620 | 2632552 | 2633667 | 6     | unknown                                                                        |
| ACHSKI-946 | GK2625 | 2636496 | 2637242 | 1.10  | signal peptidase (late competence protein)                                     |
| ACHSKI-947 | GK2637 | 2651351 | 2652700 | 2.5   | folyl-polyglutamate synthetase (EC 6.3.2.17)                                   |
| ACHSKI-948 | GK2638 | 2652884 | 2655526 | 3.7.2 | valyl-tRNA synthetase (EC 6.1.1.9)                                             |
| ACHSKI-949 | GK2640 | 2656228 | 2657259 | 5     | unknown conserved protein                                                      |
| ACHSKI-950 | GK2641 | 2657304 | 2658353 | 5     | unknown conserved protein                                                      |
| ACHSKI-951 | GK2642 | 2658472 | 2659761 | 2.5   | glutamate-1-semialdehyde 2,1-aminotransferase (EC 5.4.3.8)                     |
| ACHSKI-952 | GK2643 | 2659778 | 2660752 | 2.5   | delta-aminolevulinic acid dehydratase (porphobilinogen synthase) (EC 4.2.1.24) |

|             |        |         |         |       |                                                                                  |
|-------------|--------|---------|---------|-------|----------------------------------------------------------------------------------|
| ACHSKI-953  | GK2644 | 2660753 | 2661523 | 2.5   | uroporphyrinogen III cosynthase (EC 4.2.1.75)                                    |
| ACHSKI-954  | GK2645 | 2661523 | 2662452 | 2.5   | porphobilinogen deaminase (hydroxymethylbilane synthase) (EC 4.3.1.8)            |
| ACHSKI-955  | GK2646 | 2662468 | 2663286 | 2.5   | negative effector of the concentration of HemaA                                  |
| ACHSKI-956  | GK2647 | 2663297 | 2664661 | 2.5   | glutamyl-tRNA reductase (EC 1.2.1.-)                                             |
| ACHSKI-957  | GK2649 | 2665355 | 2665942 | 4.6   | GTP-binding protein                                                              |
| ACHSKI-958  | GK2650 | 2665939 | 2668266 | 4.1   | ATP-dependent Lon protease (EC 3.4.21.53)                                        |
| ACHSKI-959  | GK2652 | 2670330 | 2671595 | 4.1   | ATP-dependent Clp protease ATP-binding subunit (class III heat-shock protein)    |
| ACHSKI-960  | GK2653 | 2671826 | 2673112 | 3.9   | trigger factor (prolyl isomerase)                                                |
| ACHSKI-961  | GK2654 | 2673277 | 2674230 | 5     | unknown conserved protein                                                        |
| ACHSKI-962  | GK2655 | 2674462 | 2675055 | 2.2   | 3-isopropylmalate dehydratase small subunit (EC 4.2.1.33)                        |
| ACHSKI-963  | GK2656 | 2675152 | 2676567 | 2.2   | 3-isopropylmalate dehydratase large subunit (EC 4.2.1.33)                        |
| ACHSKI-964  | GK2657 | 2676588 | 2677703 | 2.2   | 3-isopropylmalate dehydrogenase (EC 1.1.1.85)                                    |
| ACHSKI-965  | GK2658 | 2677721 | 2679268 | 2.2   | 2-isopropylmalate synthase (EC 4.1.3.12)                                         |
| ACHSKI-966  | GK2659 | 2679255 | 2680280 | 2.2   | ketol-acid reductoisomerase (EC 1.1.1.86)                                        |
| ACHSKI-967  | GK2660 | 2680383 | 2680901 | 2.2   | acetolactate synthase (acetohydroxy-acid synthase) small subunit (EC 4.1.3.18)   |
| ACHSKI-968  | GK2661 | 2680880 | 2682670 | 2.2   | acetolactate synthase large subunit (EC 4.1.3.18)                                |
| ACHSKI-969  | GK2664 | 2686016 | 2686522 | 5     | unknown conserved protein                                                        |
| ACHSKI-970  | GK2665 | 2686519 | 2687133 | 5     | unknown conserved protein                                                        |
| ACHSKI-971  | GK2666 | 2687130 | 2687903 | 3.6   | ribonuclease PH (EC 2.7.7.56)                                                    |
| ACHSKI-972  | GK2667 | 2688052 | 2689125 | 1.9   | germination (cortex hydrolysis) and sporulation (stage II, multiple polar septa) |
| ACHSKI-973  | GK2668 | 2689230 | 2690024 | 1.1   | glutamate racemase (EC 5.1.1.3)                                                  |
| ACHSKI-974  | GK2669 | 2690034 | 2690465 | 3.5.2 | transcriptional regulator (MarR family)                                          |
| ACHSKI-975  | GK2670 | 2690686 | 2690910 | 3.5.2 | transcriptional regulator                                                        |
| ACHSKI-976  | GK2671 | 2691144 | 2691905 | 2.1.3 | succinate dehydrogenase (iron-sulfur protein) (EC 1.3.99.1)                      |
| ACHSKI-977  | GK2672 | 2691907 | 2693664 | 2.1.3 | succinate dehydrogenase (flavoprotein subunit) (EC 1.3.99.1)                     |
| ACHSKI-978  | GK2673 | 2693834 | 2694442 | 2.1.3 | succinate dehydrogenase (cytochrome b558 subunit) (EC 1.3.99.1)                  |
| ACHSKI-979  | GK2674 | 2694687 | 2695139 | 5     | unknown conserved protein                                                        |
| ACHSKI-980  | GK2675 | 2695188 | 2696960 | 3.2   | excinuclease ABC (subunit C) (EC 4.1.99.3)                                       |
| ACHSKI-981  | GK2682 | 2703653 | 2704597 | 2.1.1 | nucleotide sugar epimerase                                                       |
| ACHSKI-982  | GK2685 | 2706313 | 2706630 | 1.4   | thioredoxin (TRX)                                                                |
| ACHSKI-983  | GK2687 | 2707825 | 2708601 | 1.4   | electron transfer flavoprotein beta subunit                                      |
| ACHSKI-984  | GK2688 | 2708667 | 2709440 | 2.4   | enoyl-CoA hydratase (EC 4.2.1.17)                                                |
| ACHSKI-985  | GK2689 | 2709466 | 2710053 | 3.5.2 | transcriptional regulator (TetR/AcrR family)                                     |
| ACHSKI-986  | GK2690 | 2710118 | 2711818 | 2.4   | long chain acyl-CoA synthetase                                                   |
| ACHSKI-987  | GK2692 | 2712080 | 2712493 | 5     | unknown conserved protein                                                        |
| ACHSKI-988  | GK2694 | 2714878 | 2716602 | 3.2   | DNA-dependent DNA polymerase beta chain                                          |
| ACHSKI-989  | GK2695 | 2716693 | 2717232 | 5     | unknown conserved protein                                                        |
| ACHSKI-990  | GK2696 | 2717225 | 2717500 | 5     | unknown conserved protein                                                        |
| ACHSKI-991  | GK2699 | 2720079 | 2723243 | 5     | unknown conserved protein                                                        |
| ACHSKI-992  | GK2700 | 2723240 | 2723692 | 3.5.2 | transcriptional regulator (MarR family)                                          |
| ACHSKI-993  | GK2701 | 2723970 | 2725250 | 2.6   | alkaline phosphatase (EC 3.1.3.1)                                                |
| ACHSKI-994  | GK2702 | 2725562 | 2725912 | 5     | unknown conserved protein                                                        |
| ACHSKI-995  | GK2703 | 2725912 | 2726301 | 5     | unknown conserved protein                                                        |
| ACHSKI-996  | GK2706 | 2728613 | 2731027 | 3.7.2 | phenylalanyl-tRNA synthetase beta subunit (EC 6.1.1.20)                          |
| ACHSKI-997  | GK2707 | 2731049 | 2732083 | 3.7.2 | phenylalanyl-tRNA synthetase alpha subunit (EC 6.1.1.20)                         |
| ACHSKI-998  | GK2709 | 2732886 | 2733641 | 3.6   | rRNA methylase (EC 2.1.1.-)                                                      |
| ACHSKI-999  | GK2712 | 2735162 | 2735371 | 5     | unknown conserved protein                                                        |
| ACHSKI-1000 | GK2713 | 2735400 | 2736488 | 5     | unknown conserved protein                                                        |
| ACHSKI-1001 | GK2715 | 2737083 | 2737334 | 5     | unknown conserved protein                                                        |
| ACHSKI-1002 | GK2716 | 2737392 | 2737751 | 3.7.1 | 50S ribosomal protein L20                                                        |
| ACHSKI-1003 | GK2717 | 2737777 | 2737977 | 3.7.1 | 50S ribosomal protein L35                                                        |
| ACHSKI-1004 | GK2718 | 2737991 | 2738710 | 3.7.3 | translation initiation factor IF-3                                               |
| ACHSKI-1005 | GK2719 | 2738930 | 2740888 | 3.7.2 | threonyl-tRNA synthetase (EC 6.1.1.3)                                            |

|             |        |         |         |       |                                                                                                      |
|-------------|--------|---------|---------|-------|------------------------------------------------------------------------------------------------------|
| ACHSKI-1006 | GK2720 | 2741224 | 2742099 | 5     | unknown conserved protein                                                                            |
| ACHSKI-1007 | GK2721 | 2742433 | 2743374 | 3.1   | primosome component (helicase loader)                                                                |
| ACHSKI-1008 | GK2722 | 2743386 | 2744771 | 3.1   | chromosome replication initiation/membrane attachment protein                                        |
| ACHSKI-1009 | GK2723 | 2744877 | 2745335 | 5     | unknown conserved protein                                                                            |
| ACHSKI-1010 | GK2725 | 2745930 | 2746304 | 2.2   | S-adenosylmethionine decarboxylase (EC 4.1.1.50)                                                     |
| ACHSKI-1011 | GK2726 | 2746618 | 2747646 | 2.1.2 | glyceraldehyde-3-phosphate dehydrogenase (EC 1.2.1.12)                                               |
| ACHSKI-1012 | GK2727 | 2747763 | 2748368 | 5     | unknown conserved protein                                                                            |
| ACHSKI-1013 | GK2728 | 2748396 | 2749220 | 3.2   | formamidopyrimidine-DNA glycosidase (EC 3.2.2.23)                                                    |
| ACHSKI-1014 | GK2730 | 2749550 | 2752186 | 3.1   | DNA-directed DNA polymerase I (POL I) (EC 2.7.7.7)                                                   |
| ACHSKI-1015 | GK2731 | 2752340 | 2754088 | 1.3   | two-component sensor histidine kinase (phosphate regulation)                                         |
| ACHSKI-1016 | GK2732 | 2754081 | 2754788 | 3.5.2 | two-component response regulator (phosphate regulation)                                              |
| ACHSKI-1017 | GK2734 | 2755549 | 2756487 | 2.1.3 | malate dehydrogenase (EC 1.1.1.37)                                                                   |
| ACHSKI-1018 | GK2735 | 2756514 | 2757785 | 2.1.3 | isocitrate dehydrogenase (EC 1.1.1.42)                                                               |
| ACHSKI-1019 | GK2736 | 2757858 | 2758976 | 2.1.3 | citrate synthase II (EC 4.1.3.7)                                                                     |
| ACHSKI-1020 | GK2738 | 2759819 | 2760937 | 5     | unknown conserved protein                                                                            |
| ACHSKI-1021 | GK2739 | 2761080 | 2762843 | 2.1.2 | pyruvate kinase (EC 2.7.1.40)                                                                        |
| ACHSKI-1022 | GK2740 | 2762871 | 2763830 | 2.1.2 | 6-phosphofructokinase (Phosphofructokinase) (Phosphohexokinase) (EC 2.7.1.11)                        |
| ACHSKI-1023 | GK2741 | 2764010 | 2764987 | 2.4   | acetyl CoA carboxylase alpha subunit (EC 6.4.1.2)                                                    |
| ACHSKI-1024 | GK2742 | 2764972 | 2765844 | 2.4   | acetyl-CoA carboxylase beta subunit (EC 6.4.1.2)                                                     |
| ACHSKI-1025 | GK2744 | 2766627 | 2769902 | 3.1   | DNA-directed DNA polymerase III alpha subunit                                                        |
| ACHSKI-1026 | GK2746 | 2770356 | 2770859 | 5     | unknown conserved protein                                                                            |
| ACHSKI-1027 | GK2747 | 2771012 | 2771959 | 5     | unknown conserved protein                                                                            |
| ACHSKI-1028 | GK2748 | 2772060 | 2772368 | 5     | unknown conserved protein                                                                            |
| ACHSKI-1029 | GK2749 | 2772453 | 2773760 | 5     | unknown conserved protein                                                                            |
| ACHSKI-1030 | GK2750 | 2773878 | 2774558 | 5     | unknown conserved protein                                                                            |
| ACHSKI-1031 | GK2751 | 2774698 | 2775792 | 3.8   | Xaa-Pro dipeptidase                                                                                  |
| ACHSKI-1032 | GK2756 | 2778777 | 2780198 | 2.2   | argininosuccinate lyase (arginosuccinase) (EC 4.3.2.1)                                               |
| ACHSKI-1033 | GK2757 | 2780219 | 2781439 | 2.2   | argininosuccinate synthase (citrulline--aspartate ligase) (EC 6.3.4.5)                               |
| ACHSKI-1034 | GK2772 | 2797314 | 2798810 | 2.5   | NAD-dependent aldehyde dehydrogenase (EC 1.2.1.3)                                                    |
| ACHSKI-1035 | GK2785 | 2810988 | 2812178 | 2.1.1 | acetate kinase (acetokinase) (EC 2.7.2.1)                                                            |
| ACHSKI-1036 | GK2786 | 2812558 | 2813547 | 5     | unknown conserved protein                                                                            |
| ACHSKI-1037 | GK2787 | 2813667 | 2814167 | 4.2   | thiol peroxidase (EC 1.11.1.-) (superoxide-inducible protein 8)                                      |
| ACHSKI-1038 | GK2788 | 2814292 | 2814756 | 5     | unknown conserved protein                                                                            |
| ACHSKI-1039 | GK2789 | 2814768 | 2815457 | 5     | unknown conserved protein                                                                            |
| ACHSKI-1040 | GK2792 | 2817170 | 2817973 | 5     | unknown conserved protein                                                                            |
| ACHSKI-1041 | GK2793 | 2818137 | 2819729 | 2.1.1 | acetate-CoA ligase (EC 6.2.1.1)                                                                      |
| ACHSKI-1042 | GK2794 | 2819867 | 2820070 | 1.8   | small acid-soluble spore protein (major alpha-type SASP)                                             |
| ACHSKI-1043 | GK2795 | 2820152 | 2821357 | 2.5   | protein involved in thiamine biosynthesis                                                            |
| ACHSKI-1044 | GK2796 | 2821362 | 2822507 | 4.6   | cysteine desulfurase (EC 4.4.1.-)                                                                    |
| ACHSKI-1045 | GK2798 | 2822886 | 2824589 | 1.7   | septation ring formation regulator                                                                   |
| ACHSKI-1046 | GK2799 | 2824785 | 2825609 | 2.2   | histidinol phosphatase (EC 3.1.3.15)                                                                 |
| ACHSKI-1047 | GK2800 | 2825702 | 2826178 | 5     | unknown conserved protein                                                                            |
| ACHSKI-1048 | GK2801 | 2826234 | 2828054 | 1.3   | two-component sensor histidine kinase                                                                |
| ACHSKI-1049 | GK2802 | 2828404 | 2829006 | 3.7.1 | 30S ribosomal protein S4                                                                             |
| ACHSKI-1050 | GK2803 | 2829053 | 2830312 | 3.7.2 | tyrosyl-tRNA synthetase (Tyrosine--tRNA ligase) (EC 6.1.1.1)                                         |
| ACHSKI-1051 | GK2806 | 2833839 | 2835554 | 2.1.1 | acetyl-CoA synthetase (EC 6.2.1.1)                                                                   |
| ACHSKI-1052 | GK2807 | 2835729 | 2836361 | 2.1.1 | acetoin utilization protein                                                                          |
| ACHSKI-1053 | GK2808 | 2836454 | 2837098 | 2.1.1 | acetoin utilization protein                                                                          |
| ACHSKI-1054 | GK2809 | 2837095 | 2838264 | 2.1.1 | acetoin utilization protein                                                                          |
| ACHSKI-1055 | GK2810 | 2838428 | 2839420 | 3.5.2 | transcriptional regulator involved in carbon catabolite control                                      |
| ACHSKI-1056 | GK2811 | 2839623 | 2840705 | 2.2   | 3-deoxy-D-arabino-heptulosonate 7-phosphate synthase (EC 4.1.2.15) ; chorismate mutase (EC 5.4.99.5) |
| ACHSKI-1057 | GK2814 | 2841663 | 2842076 | 5     | unknown conserved protein                                                                            |
| ACHSKI-1058 | GK2815 | 2842223 | 2843527 | 1.1   | UDP-N-acetyl muramate-alanine ligase (EC 6.3.2.8)                                                    |

|             |        |         |         |       |                                                                               |
|-------------|--------|---------|---------|-------|-------------------------------------------------------------------------------|
| ACHSKI-1059 | GK2816 | 2843681 | 2846035 | 1.8   | DNA translocase (stage III sporulation protein E)                             |
| ACHSKI-1060 | GK2817 | 2846142 | 2846747 | 5     | unknown conserved protein                                                     |
| ACHSKI-1061 | GK2818 | 2846768 | 2847565 | 5     | unknown conserved protein                                                     |
| ACHSKI-1062 | GK2820 | 2848352 | 2849428 | 5     | unknown conserved protein                                                     |
| ACHSKI-1063 | GK2821 | 2849545 | 2849844 | 5     | unknown conserved protein                                                     |
| ACHSKI-1064 | GK2822 | 2849839 | 2850687 | 5     | unknown conserved protein                                                     |
| ACHSKI-1065 | GK2823 | 2850768 | 2851421 | 5     | unknown conserved protein                                                     |
| ACHSKI-1066 | GK2825 | 2852009 | 2852701 | 5     | unknown conserved protein                                                     |
| ACHSKI-1067 | GK2827 | 2853245 | 2855401 | 2.1.1 | pullulanase (EC 3.2.1.68)                                                     |
| ACHSKI-1068 | GK2829 | 2856453 | 2857031 | 5     | unknown conserved protein                                                     |
| ACHSKI-1069 | GK2830 | 2857028 | 2858221 | 1.2   | maltose permease                                                              |
| ACHSKI-1070 | GK2835 | 2861543 | 2863168 | 1.2   | transporter involved in the export of O-antigen and teichoic acid             |
| ACHSKI-1071 | GK2836 | 2863281 | 2864591 | 5     | unknown conserved protein                                                     |
| ACHSKI-1072 | GK2841 | 2867041 | 2867355 | 5     | unknown conserved protein                                                     |
| ACHSKI-1073 | GK2842 | 2867413 | 2869830 | 3.7.2 | leucyl-tRNA synthetase (EC 6.1.1.4)                                           |
| ACHSKI-1074 | GK2846 | 2872361 | 2872948 | 5     | unknown conserved protein                                                     |
| ACHSKI-1075 | GK2848 | 2874444 | 2874992 | 5     | unknown conserved protein                                                     |
| ACHSKI-1076 | GK2849 | 2875015 | 2876226 | 2.2   | S-adenosylmethionine synthetase (EC 2.5.1.6)                                  |
| ACHSKI-1077 | GK2850 | 2876689 | 2878275 | 2.1.2 | phosphoenolpyruvate carboxykinase (EC 4.1.1.49)                               |
| ACHSKI-1078 | GK2858 | 2885869 | 2886336 | 5     | unknown conserved protein                                                     |
| ACHSKI-1079 | GK2861 | 2887337 | 2887777 | 4.1   | starvation-induced protein controlled by sigma-B (general stress protein 20U) |
| ACHSKI-1080 | GK2863 | 2888514 | 2888990 | 1.3   | autoinducer-2 production protein (EC 3.13.1.-) (AI-2 synthesis protein)       |
| ACHSKI-1081 | GK2864 | 2889204 | 2889449 | 5     | unknown conserved protein                                                     |
| ACHSKI-1082 | GK2865 | 2889553 | 2890539 | 1.2   | ABC transporter (Mn/Zn-binding (lipo)protein) (surface adhesin A) Mn/Zn       |
| ACHSKI-1083 | GK2878 | 2904413 | 2905222 | 5     | unknown conserved protein                                                     |
| ACHSKI-1084 | GK2889 | 2913249 | 2914796 | 2.2   | pyrroline-5 carboxylate dehydrogenase (EC 1.5.1.12)                           |
| ACHSKI-1085 | GK2923 | 2956938 | 2957489 | 5     | unknown conserved protein                                                     |
| ACHSKI-1086 | GK2924 | 2957620 | 2958969 | 2.1.2 | glucose-6-phosphate isomerase A (phosphoglucose isomerase A) (EC 5.3.1.9)     |
| ACHSKI-1087 | GK2926 | 2960794 | 2961027 | 5     | unknown conserved protein                                                     |
| ACHSKI-1088 | GK2927 | 2961131 | 2961496 | 3.6   | polyribonucleotide nucleotidyltransferase                                     |
| ACHSKI-1089 | GK2931 | 2963741 | 2964916 | 2.2   | aminotransferase                                                              |
| ACHSKI-1090 | GK2944 | 2973996 | 2974601 | 2.5   | protein involved in biotin metabolism                                         |
| ACHSKI-1091 | GK2949 | 2979128 | 2979766 | 5     | unknown conserved protein                                                     |
| ACHSKI-1092 | GK2950 | 2979994 | 2980311 | 5     | unknown conserved protein                                                     |
| ACHSKI-1093 | GK2953 | 2981329 | 2982543 | 1.4   | NADH dehydrogenase (EC 1.6.99.3)                                              |
| ACHSKI-1094 | GK2954 | 2982829 | 2983827 | 1.4   | thioredoxin reductase                                                         |
| ACHSKI-1095 | GK2956 | 2984512 | 2984877 | 5     | unknown conserved protein                                                     |
| ACHSKI-1096 | GK2957 | 2985029 | 2985901 | 2.2   | diaminopimelate epimerase                                                     |
| ACHSKI-1097 | GK2959 | 2986446 | 2987516 | 1.4   | NADH dehydrogenase (EC 1.6.99.3)                                              |
| ACHSKI-1098 | GK2960 | 2987555 | 2987908 | 5     | unknown conserved protein                                                     |
| ACHSKI-1099 | GK2961 | 2987993 | 2988235 | 4.6   | nitrogen fixation protein (NifU protein)                                      |
| ACHSKI-1100 | GK2962 | 2988472 | 2989386 | 2.2   | homoserine kinase (EC 2.7.1.39)                                               |
| ACHSKI-1101 | GK2963 | 2989383 | 2990444 | 2.2   | threonine synthase (EC 4.2.3.1)                                               |
| ACHSKI-1102 | GK2964 | 2990444 | 2991742 | 2.2   | homoserine dehydrogenase (EC 1.1.1.3)                                         |
| ACHSKI-1103 | GK2965 | 2991835 | 2992809 | 2.1.1 | 2-hydroxyacid dehydrogenase                                                   |
| ACHSKI-1104 | GK2966 | 2992955 | 2993956 | 5     | unknown conserved protein                                                     |
| ACHSKI-1105 | GK2967 | 2994246 | 2994743 | 5     | unknown conserved protein                                                     |
| ACHSKI-1106 | GK2968 | 2994827 | 2995597 | 5     | unknown conserved protein                                                     |
| ACHSKI-1107 | GK2969 | 2995622 | 2996059 | 5     | unknown conserved protein                                                     |
| ACHSKI-1108 | GK2972 | 2996987 | 2997271 | 5     | unknown conserved protein                                                     |
| ACHSKI-1109 | GK2973 | 2997375 | 2998061 | 5     | unknown conserved protein                                                     |
| ACHSKI-1110 | GK2974 | 2998184 | 2999119 | 2.5   | lipoic acid synthetase (lipoate synthase)                                     |
| ACHSKI-1111 | GK2975 | 2999247 | 3000236 | 5     | unknown conserved protein                                                     |

|             |        |         |         |       |                                                                                                 |
|-------------|--------|---------|---------|-------|-------------------------------------------------------------------------------------------------|
| ACHSKI-1112 | GK2981 | 3005755 | 3006501 | 5     | unknown conserved protein                                                                       |
| ACHSKI-1113 | GK2982 | 3006555 | 3006857 | 5     | unknown conserved protein                                                                       |
| ACHSKI-1114 | GK2984 | 3008319 | 3009221 | 5     | unknown conserved protein                                                                       |
| ACHSKI-1115 | GK2985 | 3009245 | 3010093 | 5     | unknown conserved protein                                                                       |
| ACHSKI-1116 | GK2991 | 3016503 | 3017900 | 5     | unknown conserved protein                                                                       |
| ACHSKI-1117 | GK2992 | 3017907 | 3018356 | 4.6   | nitrogen fixation protein NifU                                                                  |
| ACHSKI-1118 | GK2993 | 3018346 | 3019566 | 2.2   | cysteine desulfurase (EC 4.4.1.-)                                                               |
| ACHSKI-1119 | GK2994 | 3019563 | 3020873 | 5     | unknown conserved protein                                                                       |
| ACHSKI-1120 | GK2995 | 3020891 | 3021670 | 1.2   | ABC transporter (ATP-binding protein)                                                           |
| ACHSKI-1121 | GK2996 | 3021903 | 3022265 | 5     | unknown conserved protein                                                                       |
| ACHSKI-1122 | GK2997 | 3022762 | 3023613 | 1.2   | ABC transporter (substrate binding protein) (lipoprotein) amino acid                            |
| ACHSKI-1123 | GK2998 | 3023629 | 3024297 | 1.2   | ABC transporter (permease)                                                                      |
| ACHSKI-1124 | GK2999 | 3024287 | 3025315 | 1.2   | ABC transporter (ATP-binding protein)                                                           |
| ACHSKI-1125 | GK3001 | 3026079 | 3026396 | 1.4   | thioredoxin                                                                                     |
| ACHSKI-1126 | GK3004 | 3027163 | 3027546 | 2.2   | protein H involved in glycine cleavage system                                                   |
| ACHSKI-1127 | GK3005 | 3027643 | 3028008 | 4.2   | arsenate reductase                                                                              |
| ACHSKI-1128 | GK3006 | 3028086 | 3029870 | 2.4   | acetyl-CoA dehydrogenase                                                                        |
| ACHSKI-1129 | GK3007 | 3030008 | 3031180 | 2.4   | acetyl-CoA acyltransferase                                                                      |
| ACHSKI-1130 | GK3008 | 3031208 | 3033595 | 2.4   | 3-hydroxyacyl-CoA dehydrogenase                                                                 |
| ACHSKI-1131 | GK3010 | 3034150 | 3035067 | 2.2   | proline dehydrogenase                                                                           |
| ACHSKI-1132 | GK3012 | 3035505 | 3035840 | 5     | unknown conserved protein                                                                       |
| ACHSKI-1133 | GK3027 | 3047926 | 3048573 | 3.5.2 | transcriptional regulator                                                                       |
| ACHSKI-1134 | GK3028 | 3048613 | 3050124 | 4.1   | 5-carboxy-2-hydroxymuconate semialdehyde dehydrogenase                                          |
| ACHSKI-1135 | GK3043 | 3064195 | 3064662 | 3.8   | ssrA RNA (tmRNA)-binding protein                                                                |
| ACHSKI-1136 | GK3044 | 3064744 | 3067020 | 2.3   | ribonuclease R                                                                                  |
| ACHSKI-1137 | GK3045 | 3067043 | 3067783 | 4.2   | carboxylesterase (EC 3.1.1.1)                                                                   |
| ACHSKI-1138 | GK3046 | 3067858 | 3068094 | 1.6   | protein translocation subunit                                                                   |
| ACHSKI-1139 | GK3054 | 3073536 | 3074828 | 2.1.2 | enolase (2-phosphoglycerate dehydratase) (EC 4.2.1.11)                                          |
| ACHSKI-1140 | GK3055 | 3074870 | 3076405 | 2.1.2 | 2,3-bisphosphoglycerate-independent phosphoglycerate mutase (Phosphoglyceromutase) (EC 5.4.2.1) |
| ACHSKI-1141 | GK3058 | 3078528 | 3079535 | 2.1.2 | glyceraldehyde-3-phosphate dehydrogenase (phosphorylating) (EC 1.2.1.12)                        |
| ACHSKI-1142 | GK3059 | 3079578 | 3080597 | 3.5.2 | transcriptional regulator (central glycolytic gene regulator)                                   |
| ACHSKI-1143 | GK3061 | 3081017 | 3082324 | 3.5.1 | RNA polymerase sigma-54 factor (sigma-L)                                                        |
| ACHSKI-1144 | GK3062 | 3083634 | 3084224 | 4.1   | ATP-dependent Clp protease proteolytic subunit (class III heat-shock protein)                   |
| ACHSKI-1145 | GK3063 | 3084351 | 3084608 | 2.1.1 | phosphotransferase system phosphocarrier protein HPr                                            |
| ACHSKI-1146 | GK3064 | 3084623 | 3085585 | 5     | unknown conserved protein                                                                       |
| ACHSKI-1147 | GK3065 | 3085706 | 3086659 | 5     | unknown conserved protein                                                                       |
| ACHSKI-1148 | GK3066 | 3086656 | 3087552 | 5     | unknown conserved protein                                                                       |
| ACHSKI-1149 | GK3068 | 3088385 | 3089341 | 1.4   | thioredoxin reductase (EC 1.8.1.9)                                                              |
| ACHSKI-1150 | GK3069 | 3089417 | 3090889 | 5     | unknown conserved protein                                                                       |
| ACHSKI-1151 | GK3071 | 3091686 | 3092444 | 2.2   | imidazoleglycerol-phosphate synthase (EC 4.1.3.-)                                               |
| ACHSKI-1152 | GK3072 | 3092441 | 3093178 | 2.2   | phosphoribosylformimino-5-aminoimidazole carboxamide ribotide isomerase (EC 5.3.1.16)           |
| ACHSKI-1153 | GK3073 | 3093178 | 3093813 | 2.2   | imidazole glycerol phosphate synthase subunit (EC 2.4.2.-)                                      |
| ACHSKI-1154 | GK3074 | 3094044 | 3094631 | 2.2   | imidazoleglycerol-phosphate dehydratase (EC 4.2.1.19)                                           |
| ACHSKI-1155 | GK3075 | 3094635 | 3095909 | 2.2   | histidinol dehydrogenase (EC 1.1.1.23)                                                          |
| ACHSKI-1156 | GK3076 | 3096260 | 3096883 | 2.2   | ATP phosphoribosyltransferase (EC 2.4.2.17)                                                     |
| ACHSKI-1157 | GK3077 | 3097062 | 3098246 | 3.7.2 | histidyl-tRNA synthetase (EC 6.1.1.21)                                                          |
| ACHSKI-1158 | GK3078 | 3098794 | 3099291 | 2.1.1 | acetyltransferase                                                                               |
| ACHSKI-1159 | GK3079 | 3099288 | 3099956 | 4.6   | phosphoglycolate phosphatase                                                                    |
| ACHSKI-1160 | GK3081 | 3100991 | 3101803 | 3.8   | prolipoprotein diacylglyceryl transferase (Spore germination protein)                           |
| ACHSKI-1161 | GK3082 | 3101863 | 3102798 | 3.8   | HPr(Ser/Thr) kinase/phosphatase (EC 2.7.1.-)                                                    |
| ACHSKI-1162 | GK3083 | 3103047 | 3103409 | 5     | unknown conserved protein                                                                       |
| ACHSKI-1163 | GK3085 | 3103967 | 3106834 | 3.2   | excinuclease ABC subunit A                                                                      |
| ACHSKI-1164 | GK3086 | 3106842 | 3108818 | 3.2   | excinuclease ABC subunit B                                                                      |

|             |        |         |         |       |                                                                                                                                   |
|-------------|--------|---------|---------|-------|-----------------------------------------------------------------------------------------------------------------------------------|
| ACHSKI-1165 | GK3088 | 3109306 | 3110478 | 5     | unknown conserved protein                                                                                                         |
| ACHSKI-1166 | GK3092 | 3114710 | 3116158 | 2.2   | carboxy-terminal processing protease                                                                                              |
| ACHSKI-1167 | GK3100 | 3123667 | 3124560 | 1.7   | cell-division protein                                                                                                             |
| ACHSKI-1168 | GK3101 | 3124541 | 3125236 | 1.7   | cell-division ATP-binding protein                                                                                                 |
| ACHSKI-1169 | GK3102 | 3125496 | 3125831 | 1.4   | cytochrome c551                                                                                                                   |
| ACHSKI-1170 | GK3107 | 3128689 | 3131202 | 1.6   | preprotein translocase subunit (ATPase, RNA helicase)                                                                             |
| ACHSKI-1171 | GK3109 | 3132017 | 3132568 | 3.7.1 | ribosomal protein S30EA                                                                                                           |
| ACHSKI-1172 | GK3113 | 3134717 | 3135118 | 1.5   | flagellar protein                                                                                                                 |
| ACHSKI-1173 | GK3114 | 3135321 | 3136823 | 1.5   | flagellar hook-associated protein 2 (filament cap protein)                                                                        |
| ACHSKI-1174 | GK3128 | 3149909 | 3150904 | 1.8   | dTDP-glucose 4,6-dehydratase (EC 4.2.1.46)                                                                                        |
| ACHSKI-1175 | GK3131 | 3153652 | 3154545 | 1.5   | flagellin protein                                                                                                                 |
| ACHSKI-1176 | GK3137 | 3157103 | 3158698 | 1.5   | flagellar hook-associated protein 1 (HAP1)                                                                                        |
| ACHSKI-1177 | GK3141 | 3160064 | 3160501 | 5     | unknown conserved protein                                                                                                         |
| ACHSKI-1178 | GK3143 | 3162418 | 3162843 | 1.5   | protein involved in flagellar biosynthesis (flhS-related protein)                                                                 |
| ACHSKI-1179 | GK3146 | 3166313 | 3167005 | 1.10  | late competence protein                                                                                                           |
| ACHSKI-1180 | GK3147 | 3167002 | 3168393 | 1.10  | late competence protein                                                                                                           |
| ACHSKI-1181 | GK3149 | 3169253 | 3170098 | 5     | unknown conserved protein                                                                                                         |
| ACHSKI-1182 | GK3150 | 3170354 | 3171028 | 3.5.2 | two-component response regulator (extracellular proteinase response regulator)                                                    |
| ACHSKI-1183 | GK3152 | 3172423 | 3173064 | 5     | unknown conserved protein                                                                                                         |
| ACHSKI-1184 | GK3193 | 3227079 | 3227708 | 5     | unknown conserved protein                                                                                                         |
| ACHSKI-1185 | GK3202 | 3236185 | 3237108 | 3.5.2 | transcriptional regulator (TetR/AcrR family)                                                                                      |
| ACHSKI-1186 | GK3212 | 3247429 | 3248772 | 2.1.1 | 6-phospho-beta-glucosidase (EC 3.2.1.86)                                                                                          |
| ACHSKI-1187 | GK3220 | 3257400 | 3258386 | 5     | unknown conserved protein                                                                                                         |
| ACHSKI-1188 | GK3222 | 3259148 | 3259567 | 4.2   | arsenate reductase (arsenical pump modifier)                                                                                      |
| ACHSKI-1189 | GK3227 | 3263000 | 3263944 | 1.2   | ABC transporter (permease) ribose                                                                                                 |
| ACHSKI-1190 | GK3228 | 3263941 | 3265425 | 1.2   | ABC transporter (ATP-binding protein) ribose                                                                                      |
| ACHSKI-1191 | GK3229 | 3265456 | 3265866 | 1.2   | ABC transporter (permease) ribose                                                                                                 |
| ACHSKI-1192 | GK3230 | 3265866 | 3266759 | 2.1.1 | ribokinase (EC 2.7.1.15)                                                                                                          |
| ACHSKI-1193 | GK3231 | 3266756 | 3267745 | 3.5.2 | transcriptional repressor of the ribose operon                                                                                    |
| ACHSKI-1194 | GK3233 | 3268259 | 3268711 | 5     | unknown conserved protein                                                                                                         |
| ACHSKI-1195 | GK3242 | 3277875 | 3279083 | 2.2   | N-acyl-L-amino acid amidohydrolase (L-aminoacylase)                                                                               |
| ACHSKI-1196 | GK3251 | 3287220 | 3288404 | 2.2   | N-acyl-L-amino acid amidohydrolase (L-aminoacylase) (EC 3.5.1.14)                                                                 |
| ACHSKI-1197 | GK3254 | 3291409 | 3292782 | 2.1.1 | NDP-sugar dehydrogenase                                                                                                           |
| ACHSKI-1198 | GK3269 | 3310798 | 3311685 | 1.1   | UTP-glucose-1-phosphate uridylyltransferase (Uridine diphosphoglucose pyrophosphorylase) (general stress protein 33) (EC 2.7.7.9) |
| ACHSKI-1199 | GK3297 | 3338225 | 3339967 | 2.1.1 | phosphomannomutase (EC 5.4.2.8)                                                                                                   |
| ACHSKI-1200 | GK3299 | 3341644 | 3342933 | 1.1   | O-antigen transporter                                                                                                             |
| ACHSKI-1201 | GK3300 | 3343043 | 3343336 | 6     | unknown                                                                                                                           |
| ACHSKI-1202 | GK3317 | 3363539 | 3364798 | 1.1   | O-antigen transporter                                                                                                             |
| ACHSKI-1203 | GK3319 | 3365152 | 3365826 | 1.1   | sugar transferase involved in lipopolysaccharide synthesis                                                                        |
| ACHSKI-1204 | GK3320 | 3365841 | 3366725 | 1.1   | UTP-glucose-1-phosphate uridylyltransferase (EC 2.7.7.9)                                                                          |
| ACHSKI-1205 | GK3324 | 3369979 | 3370920 | 3.5.2 | attenuator role for lytABC and lytR expression                                                                                    |
| ACHSKI-1206 | GK3326 | 3371797 | 3372504 | 4.1   | involved in capsular polysaccharide biosynthesis                                                                                  |
| ACHSKI-1207 | GK3327 | 3372485 | 3373228 | 4.1   | involved in capsular polysaccharide biosynthesis                                                                                  |
| ACHSKI-1208 | GK3329 | 3373888 | 3374325 | 2.4   | hydroxymyristoyl-[acyl carrier protein] dehydratase (EC 4.2.1.-)                                                                  |
| ACHSKI-1209 | GK3331 | 3374712 | 3375533 | 1.5   | flagellar hook-basal body protein                                                                                                 |
| ACHSKI-1210 | GK3332 | 3375552 | 3376382 | 1.5   | flagellar basal-body rod protein                                                                                                  |
| ACHSKI-1211 | GK3333 | 3376723 | 3377724 | 1.1   | cell shape determining protein (MreB-like protein)                                                                                |
| ACHSKI-1212 | GK3334 | 3377831 | 3378094 | 3.5.2 | transcriptional regulator of sigma-E/sigma-K-dependent gene (stage III sporulation protein D)                                     |
| ACHSKI-1213 | GK3339 | 3382278 | 3383165 | 1.8   | stage II sporulation protein                                                                                                      |
| ACHSKI-1214 | GK3340 | 3383354 | 3384385 | 1.8   | stage II sporulation protein D                                                                                                    |
| ACHSKI-1215 | GK3341 | 3384953 | 3386257 | 1.1   | UDP-N-acetylglucosamine 1-carboxyvinyltransferase (EC 2.5.1.7)                                                                    |
| ACHSKI-1216 | GK3342 | 3386289 | 3387044 | 5     | unknown conserved protein                                                                                                         |
| ACHSKI-1217 | GK3346 | 3389421 | 3390998 | 1.4   | NADH:ubiquinone oxidoreductase subunit 4 (chain M) (EC 1.6.5.3)                                                                   |

|             |        |         |         |       |                                                                                |
|-------------|--------|---------|---------|-------|--------------------------------------------------------------------------------|
| ACHSKI-1218 | GK3347 | 3390995 | 3392857 | 1.4   | NADH:ubiquinone oxidoreductase subunit 5 (chain L) (EC 1.6.5.3)                |
| ACHSKI-1219 | GK3357 | 3399099 | 3399500 | 1.4   | F0F1-type ATP synthase epsilon chain (EC 3.6.3.14)                             |
| ACHSKI-1220 | GK3358 | 3399523 | 3400944 | 1.4   | F0F1-type ATP synthase beta chain (EC 3.6.3.14)                                |
| ACHSKI-1221 | GK3359 | 3400972 | 3401829 | 1.4   | F0F1-type ATP synthase gamma chain (EC 3.6.3.14)                               |
| ACHSKI-1222 | GK3360 | 3401897 | 3403405 | 1.4   | F0F1-type ATP synthase alpha chain (EC 3.6.3.14)                               |
| ACHSKI-1223 | GK3361 | 3403430 | 3403966 | 1.4   | F0F1-type ATP synthase delta chain (EC 3.6.3.14)                               |
| ACHSKI-1224 | GK3362 | 3403963 | 3404496 | 1.4   | F0F1-type ATP synthase B chain (EC 3.6.3.14)                                   |
| ACHSKI-1225 | GK3363 | 3404617 | 3404835 | 1.4   | F0F1-type ATP synthase C chain (EC 3.6.3.14)                                   |
| ACHSKI-1226 | GK3364 | 3404907 | 3405620 | 1.4   | F0F1-type ATP synthase A chain (EC 3.6.3.14)                                   |
| ACHSKI-1227 | GK3365 | 3405638 | 3406021 | 1.4   | F0F1-type ATP synthase i subunit (EC 3.6.3.14)                                 |
| ACHSKI-1228 | GK3368 | 3406851 | 3407480 | 2.3   | uracil phosphoribosyltransferase (EC 2.4.2.9)                                  |
| ACHSKI-1229 | GK3369 | 3407632 | 3408870 | 2.2   | serine hydroxymethyltransferase (EC 2.1.2.1)                                   |
| ACHSKI-1230 | GK3370 | 3408963 | 3409529 | 5     | unknown conserved protein                                                      |
| ACHSKI-1231 | GK3373 | 3412168 | 3412614 | 3.8   | protein-tyrosine-phosphatase (EC 3.1.3.48)                                     |
| ACHSKI-1232 | GK3374 | 3412869 | 3413420 | 5     | unknown conserved protein                                                      |
| ACHSKI-1233 | GK3375 | 3413833 | 3414882 | 5     | unknown conserved protein                                                      |
| ACHSKI-1234 | GK3376 | 3415030 | 3415917 | 1.8   | stage II sporulation protein R (pro-sigma-E processing factor)                 |
| ACHSKI-1235 | GK3377 | 3415953 | 3416834 | 2.5   | protoporphyrinogen oxidase                                                     |
| ACHSKI-1236 | GK3378 | 3416824 | 3417900 | 3.7.5 | peptide chain release factor 1 (RF-1) in translation                           |
| ACHSKI-1237 | GK3380 | 3418772 | 3419395 | 2.3   | thymidine kinase (EC 2.7.1.21)                                                 |
| ACHSKI-1238 | GK3381 | 3419559 | 3419759 | 3.7.1 | 50S ribosomal protein L31                                                      |
| ACHSKI-1239 | GK3382 | 3420017 | 3421291 | 3.5.4 | transcriptional terminator                                                     |
| ACHSKI-1240 | GK3383 | 3421544 | 3422506 | 5     | unknown conserved protein                                                      |
| ACHSKI-1241 | GK3384 | 3422541 | 3423827 | 1.1   | UDP-N-acetylglucosamine 1-carboxyvinyltransferase (EC 2.5.1.7)                 |
| ACHSKI-1242 | GK3385 | 3423960 | 3424601 | 2.1.2 | transaldolase (EC 2.2.1.2)                                                     |
| ACHSKI-1243 | GK3386 | 3424677 | 3425540 | 2.1.2 | fructose-bisphosphate aldolase (EC 4.1.2.13)                                   |
| ACHSKI-1244 | GK3389 | 3426938 | 3428533 | 2.3   | CTP synthetase (UTP--ammonia ligase) (EC 6.3.4.2)                              |
| ACHSKI-1245 | GK3390 | 3428694 | 3429251 | 3.5.3 | DNA-directed RNA polymerase (EC 2.7.7.6) delta subunit                         |
| ACHSKI-1246 | GK3393 | 3433797 | 3434939 | 2.4   | acyl-CoA dehydrogenase (EC 1.3.99.3)                                           |
| ACHSKI-1247 | GK3394 | 3435464 | 3436597 | 2.4   | acyl-CoA dehydrogenase (EC 1.3.99.-)                                           |
| ACHSKI-1248 | GK3395 | 3436831 | 3437682 | 2.4   | 3-hydroxybutyryl-CoA dehydrogenase (EC 1.1.1.157)                              |
| ACHSKI-1249 | GK3397 | 3438005 | 3439183 | 2.4   | acetyl-CoA acetyltransferase (EC 2.3.1.9)                                      |
| ACHSKI-1250 | GK3398 | 3439333 | 3441435 | 1.4   | iron-sulphur oxidoreductase                                                    |
| ACHSKI-1251 | GK3401 | 3443334 | 3445007 | 3.7.2 | arginyl-tRNA synthetase (EC 6.1.1.19)                                          |
| ACHSKI-1252 | GK3402 | 3445011 | 3445442 | 5     | unknown conserved protein                                                      |
| ACHSKI-1253 | GK3404 | 3446206 | 3447081 | 2.2   | agmatinase (EC 3.5.3.11)                                                       |
| ACHSKI-1254 | GK3406 | 3448178 | 3450223 | 1.1   | penicillin-binding protein                                                     |
| ACHSKI-1255 | GK3407 | 3450355 | 3450870 | 5     | unknown conserved protein                                                      |
| ACHSKI-1256 | GK3411 | 3452496 | 3453794 | 5     | unknown conserved protein                                                      |
| ACHSKI-1257 | GK3413 | 3454342 | 3454995 | 5     | unknown conserved protein                                                      |
| ACHSKI-1258 | GK3414 | 3455134 | 3455985 | 5     | unknown conserved protein                                                      |
| ACHSKI-1259 | GK3415 | 3456185 | 3457165 | 2.1.1 | phosphotransacetylase (EC 2.3.1.8)                                             |
| ACHSKI-1260 | GK3416 | 3457423 | 3458169 | 5     | unknown conserved protein                                                      |
| ACHSKI-1261 | GK3418 | 3458956 | 3459540 | 5     | unknown conserved protein                                                      |
| ACHSKI-1262 | GK3419 | 3459736 | 3460107 | 5     | unknown conserved protein                                                      |
| ACHSKI-1263 | GK3421 | 3461092 | 3461781 | 3.2   | uracil-DNA glycosylase (EC 3.2.2.-)                                            |
| ACHSKI-1264 | GK3422 | 3462169 | 3462519 | 4.1   | stage II sporulation protein AA (anti-anti-sigma factor,antagonist of SpoIIAB) |
| ACHSKI-1265 | GK3423 | 3462516 | 3463004 | 4.1   | anti-sigma B factor (Ser/Thr protein kinase)                                   |
| ACHSKI-1266 | GK3424 | 3462964 | 3463734 | 3.5.1 | DNA-directed RNA polymerase sigma-37 factor (sigma-B)                          |
| ACHSKI-1267 | GK3425 | 3463784 | 3465694 | 5     | unknown conserved protein                                                      |
| ACHSKI-1268 | GK3436 | 3476701 | 3477561 | 1.2   | ABC transporter (substrate-binding protein) phosphate                          |
| ACHSKI-1269 | GK3437 | 3477635 | 3478570 | 1.2   | ABC transporter (permease) phosphate                                           |
| ACHSKI-1270 | GK3438 | 3478567 | 3479463 | 1.2   | ABC transporter (permease) phosphate                                           |



|             |        |         |         |       |                                                        |
|-------------|--------|---------|---------|-------|--------------------------------------------------------|
| ACHSKI-1271 | GK3446 | 3488187 | 3488681 | 1.2   | PTS system, glucose-specific enzyme II, A component    |
| ACHSKI-1272 | GK3452 | 3494743 | 3496200 | 1.2   | sodium/proline symporter (osmoregulation)              |
| ACHSKI-1273 | GK3453 | 3496608 | 3497429 | 1.2   | ABC transporter (substrate-binding protein) amino acid |
| ACHSKI-1274 | GK3456 | 3499061 | 3499360 | 1.4   | cytochrome aa3 quinol oxidase subunit IV               |
| ACHSKI-1275 | GK3457 | 3499362 | 3499976 | 1.4   | cytochrome aa3 quinol oxidase subunit III              |
| ACHSKI-1276 | GK3458 | 3499980 | 3501926 | 1.4   | cytochrome aa3 quinol oxidase subunit I                |
| ACHSKI-1277 | GK3459 | 3501944 | 3502849 | 1.4   | cytochrome aa3 quinol oxidase subunit II               |
| ACHSKI-1278 | GK3461 | 3504076 | 3505464 | 1.2   | amino acid transporter                                 |
| ACHSKI-1279 | GK3463 | 3507176 | 3508702 | 1.4   | Rieske [2Fe-2S] iron-sulfur protein                    |
| ACHSKI-1280 | GK3465 | 3509980 | 3511134 | 2.1.1 | glycerate kinase (EC 2.7.1.31)                         |
| ACHSKI-1281 | GK3467 | 3513448 | 3513927 | 5     | unknown conserved protein                              |
| ACHSKI-1282 | GK3469 | 3514220 | 3515440 | 4.1   | serine protease Do                                     |
| ACHSKI-1283 | GK3471 | 3516343 | 3517125 | 5     | unknown conserved protein                              |
| ACHSKI-1284 | GK3472 | 3517112 | 3518440 | 5     | unknown conserved protein                              |
| ACHSKI-1285 | GK3473 | 3518433 | 3520262 | 1.3   | two-component sensor histidine kinase                  |
| ACHSKI-1286 | GK3474 | 3520269 | 3520982 | 3.5.2 | two-component response regulator                       |
| ACHSKI-1287 | GK3475 | 3521171 | 3522457 | 2.3   | adenylosuccinate synthase (EC 6.3.4.4)                 |
| ACHSKI-1288 | GK3476 | 3522675 | 3524039 | 3.1   | replicative DNA helicase                               |
| ACHSKI-1289 | GK3477 | 3524117 | 3524566 | 3.7.1 | 50S ribosomal protein L9 (BL17)                        |
| ACHSKI-1290 | GK3478 | 3524563 | 3526539 | 5     | unknown conserved protein                              |
| ACHSKI-1291 | GK3479 | 3526586 | 3527512 | 5     | unknown conserved protein                              |
| ACHSKI-1292 | GK3480 | 3527648 | 3527884 | 3.7.1 | 30S ribosomal protein S18 (BS21)                       |
| ACHSKI-1293 | GK3481 | 3527982 | 3528476 | 3.1   | single-strand DNA-binding protein                      |
| ACHSKI-1294 | GK3482 | 3528507 | 3528794 | 3.7.1 | 30S ribosomal protein S6 (BS9)                         |
| ACHSKI-1295 | GK3483 | 3529009 | 3530109 | 5     | unknown conserved protein                              |
| ACHSKI-1296 | GK3486 | 3532637 | 3533542 | 5     | unknown conserved protein                              |
| ACHSKI-1297 | GK3487 | 3533729 | 3534352 | 5     | unknown conserved protein                              |
| ACHSKI-1298 | GK3488 | 3534425 | 3535126 | 5     | unknown conserved protein                              |
| ACHSKI-1299 | GK3489 | 3535181 | 3536050 | 1.8   | stage 0 sporulation protein J (antagonist of Soj)      |
| ACHSKI-1300 | GK3490 | 3536043 | 3536804 | 1.8   | sporulation initiation inhibitor protein               |
| ACHSKI-1301 | GK3491 | 3536930 | 3537775 | 5     | unknown conserved protein                              |
| ACHSKI-1302 | GK3492 | 3537935 | 3538651 | 1.7   | glucose-inhibited division protein                     |
| ACHSKI-1303 | GK3493 | 3538675 | 3540564 | 1.7   | glucose-inhibited division protein                     |
| ACHSKI-1304 | GK3494 | 3540583 | 3541971 | 4.2   | thiophen/furan oxidation protein                       |
| ACHSKI-1305 | GK3495 | 3542316 | 3542972 | 1.8   | SpoIII-associated protein                              |
| ACHSKI-1306 | GK3496 | 3542969 | 3543733 | 1.8   | stage III sporulation protein J                        |
| ACHSKI-1307 | GK3497 | 3543806 | 3544171 | 3.6   | ribonuclease P (protein component)                     |
| ACHSKI-1308 | GK3498 | 3544251 | 3544385 | 3.7.1 | 50S ribosomal protein L34                              |

---
