# Supplementary material
Source: PubMed Central journal article supplement (PMC535678)
Supplement: nar_32_21_6292__4.pdf [file nar_32_21_6292__4.pdf]

**Supplementary Table S2.** List of the genes categorized into orthologous group shared among all bacilli except for *G. kaustophilus*

| I.D.     | category | gene name | product                                                                                           |
|----------|----------|-----------|---------------------------------------------------------------------------------------------------|
| ACHSI-1  | 1.2      | ybaR      | sulfate permease                                                                                  |
| ACHSI-2  | 1.2      | ybbF      | sucrose phosphotransferase enzyme II                                                              |
| ACHSI-3  | 5        | ybbI      | unknown conserved protein                                                                         |
| ACHSI-4  | 5        | ybbJ      | unknown conserved protein                                                                         |
| ACHSI-5  | 3.2      | adaB      | O6-methylguanine-DNA methyltransferase                                                            |
| ACHSI-6  | 1.2      | ybcL      | chloramphenicol resistance protein                                                                |
| ACHSI-7  | 2.2      | ybgJ      | glutaminase                                                                                       |
| ACHSI-8  | 4.2      | ybcJ      | macrolide 2'-phosphotransferase                                                                   |
| ACHSI-9  | 1.6      | tatAD     | putative component of the twin-arginine translocation pathway                                     |
| ACHSI-10 | 1.6      | tatCD     | component of the twin-arginine translocation pathway                                              |
| ACHSI-11 | 3.8      | pcp       | pyrrolidone-carboxylate peptidase                                                                 |
| ACHSI-12 | 2.4      | lip       | extracellular lipase                                                                              |
| ACHSI-13 | 5        | ycgF      | unknown conserved protein                                                                         |
| ACHSI-14 | 5        | ycgJ      | unknown conserved protein                                                                         |
| ACHSI-15 | 5        | yciC      | unknown conserved protein                                                                         |
| ACHSI-16 | 1.2      | yckA      | ABC transporter (permease) amino acid                                                             |
| ACHSI-17 | 1.2      | yckB      | ABC transporter (binding protein) amino acid                                                      |
| ACHSI-18 | 4.3      | sfp       | phosphopantetheinyl transferase (surfactin production)                                            |
| ACHSI-19 | 1.2      | yckJ      | ABC transporter (permease) glutamine                                                              |
| ACHSI-20 | 1.2      | yckK      | ABC transporter (glutamine-binding protein) glutamine                                             |
| ACHSI-21 | 1.2      | yclN      | ABC transporter (permease) ferrichrome                                                            |
| ACHSI-22 | 1.2      | yclO      | ABC transporter (permease) ferrichrome                                                            |
| ACHSI-23 | 1.2      | yclP      | ABC transporter (ATP-binding protein) ferrichrome                                                 |
| ACHSI-24 | 1.2      | yclQ      | ABC transporter (binding protein) ferrichrome                                                     |
| ACHSI-25 | 2.2      | gabT      | 4-aminobutyrate aminotransferase                                                                  |
| ACHSI-26 | 2.2      | gabD      | succinate-semialdehyde dehydrogenase                                                              |
| ACHSI-27 | 1.2      | ycnJ      | copper export protein                                                                             |
| ACHSI-28 | 5        | ycsE      | unknown conserved protein                                                                         |
| ACHSI-29 | 1.1      | pbpC      | penicillin-binding protein 3                                                                      |
| ACHSI-30 | 4.4      | ydcL      | integrase                                                                                         |
| ACHSI-31 | 4.1      | cspC      | cold-shock protein                                                                                |
| ACHSI-32 | 5        | ydeD      | unknown conserved protein                                                                         |
| ACHSI-33 | 3.5.2    | ydeE      | transcriptional regulator (AraC/XylS family)                                                      |
| ACHSI-34 | 1.2      | ydfA      | arsenical pump membrane protein                                                                   |
| ACHSI-35 | 1.2      | ydfL      | multidrug-efflux transporter regulator                                                            |
| ACHSI-36 | 1.2      | expZ      | ATP-binding transport protein                                                                     |
| ACHSI-37 | 1.2      | ydhL      | chloramphenicol resistance protein                                                                |
| ACHSI-38 | 2.5      | thiL      | thiamine-monophosphate kinase                                                                     |
| ACHSI-39 | 3.2      | ydiP      | DNA-methyltransferase (cytosine-specific)                                                         |
| ACHSI-40 | 2.1.1    | ydjL      | L-idoitol 2-dehydrogenase                                                                         |
| ACHSI-41 | 5        | yebE      | unknown conserved protein                                                                         |
| ACHSI-42 | 1.2      | yesQ      | lactose permease                                                                                  |
| ACHSI-43 | 3.5.2    | citT      | two-component response regulator involved in the response to the environmental Mg-citrate complex |
| ACHSI-44 | 5        | yfIP      | unknown conserved protein                                                                         |
| ACHSI-45 | 1.2      | yfIA      | aminoacid carrier protein                                                                         |
| ACHSI-46 | 1.4      | yfKO      | NAD(P)H-flavin oxidoreductase                                                                     |
| ACHSI-47 | 5        | yfiE      | unknown conserved protein                                                                         |
| ACHSI-48 | 3.5.2    | padR      | transcriptional repressor of padC                                                                 |
| ACHSI-49 | 2.4      | lipB      | extracellular esterase                                                                            |
| ACHSI-50 | 5        | yfhC      | unknown conserved protein                                                                         |
| ACHSI-51 | 1.2      | ygaD      | ABC transporter (ATP-binding protein)                                                             |
| ACHSI-52 | 5        | ygaJ      | unknown conserved protein                                                                         |
| ACHSI-53 | 3.5.2    | yhcF      | transcriptional regulator (GntR family)                                                           |
| ACHSI-54 | 1.2      | yhcG      | ABC transporter (ATP-binding protein)                                                             |
| ACHSI-55 | 4.2      | yhdA      | azoreductase                                                                                      |
| ACHSI-56 | 1.2      | yheI      | ABC transporter (ATP-binding protein)                                                             |
| ACHSI-57 | 5        | yhaH      | unknown conserved protein                                                                         |
| ACHSI-58 | 1.1      | pbpF      | penicillin-binding protein 2C                                                                     |
| ACHSI-59 | 2.4      | yhfJ      | lipoate-protein ligase                                                                            |
| ACHSI-60 | 5        | yhfO      | unknown conserved protein                                                                         |
| ACHSI-61 | 5        | yhjR      | unknown conserved protein                                                                         |
| ACHSI-62 | 5        | yisX      | unknown conserved protein                                                                         |
| ACHSI-63 | 5        | yitL      | unknown conserved protein                                                                         |
| ACHSI-64 | 5        | yitT      | unknown conserved protein                                                                         |
| ACHSI-65 | 1.2      | appD      | ABC transporter (ATP-binding protein) oligopeptide                                                |
| ACHSI-66 | 1.2      | appF      | ABC transporter (ATP-binding protein) oligopeptide                                                |
| ACHSI-67 | 1.2      | appA      | ABC transporter (oligopeptide-binding protein) oligopeptide                                       |
| ACHSI-68 | 1.2      | appB      | ABC transporter (permease) oligopeptide                                                           |
| ACHSI-69 | 2.4      | yjdA      | 3-oxoacyl-acyl-carrier protein reductase                                                          |
| ACHSI-70 | 2.1.1    | yjeA      | chitoooligosaccharide deacetylase                                                                 |
| ACHSI-71 | 4.4      | xhlA      | involved in cell lysis upon induction of PBSX                                                     |
| ACHSI-72 | 5        | ykcA      | unknown conserved protein                                                                         |
| ACHSI-73 | 4.2      | ykFA      | immunity to bacteriotoxins                                                                        |
| ACHSI-74 | 2.1.1    | ykFB      | chloromuconate cycloisomerase                                                                     |
| ACHSI-75 | 2.4      | ykhA      | acyl-CoA hydrolase                                                                                |
| ACHSI-76 | 4.2      | ykkB      | N-acetyltransferase                                                                               |
| ACHSI-77 | 3.9      | ykkC      | molecular chaperone                                                                               |

|           |       |      |                                                                         |
|-----------|-------|------|-------------------------------------------------------------------------|
| ACHSI-78  | 2.2   | metE | cobalamin-independent methionine synthase                               |
| ACHSI-79  | 5     | ykoV | unknown conserved protein                                               |
| ACHSI-80  | 4.2   | ykoY | toxic anion resistance protein                                          |
| ACHSI-81  | 1.2   | ykrM | Na <sup>+</sup> -transporting ATP synthase                              |
| ACHSI-82  | 1.8   | spIB | spore photoproduct lyase                                                |
| ACHSI-83  | 3.5.2 | ccpC | transcriptional regulator mediating carbon catabolite repression        |
| ACHSI-84  | 5     | yknX | unknown conserved protein                                               |
| ACHSI-85  | 1.2   | yknY | ABC transporter (ATP-binding protein)                                   |
| ACHSI-86  | 5     | yknZ | unknown conserved protein                                               |
| ACHSI-87  | 5     | ykyA | unknown conserved protein                                               |
| ACHSI-88  | 5     | yktA | unknown conserved protein                                               |
| ACHSI-89  | 5     | yktB | unknown conserved protein                                               |
| ACHSI-90  | 5     | ylbP | unknown conserved protein                                               |
| ACHSI-91  | 5     | ylmC | unknown conserved protein                                               |
| ACHSI-92  | 5     | ymcC | unknown conserved protein                                               |
| ACHSI-93  | 1.9   | yndE | spore germination protein                                               |
| ACHSI-94  | 4.2   | yndN | fosfomycin resistance protein                                           |
| ACHSI-95  | 1.2   | alsT | amino acid carrier protein                                              |
| ACHSI-96  | 5     | yoeA | unknown conserved protein                                               |
| ACHSI-97  | 5     | yoeD | unknown conserved protein                                               |
| ACHSI-98  | 5     | yoaR | unknown conserved protein                                               |
| ACHSI-99  | 5     | yoZL | unknown conserved protein                                               |
| ACHSI-100 | 1.6   | csaA | molecular chaperone involved in protein secretion                       |
| ACHSI-101 | 4.2   | yocD | immunity to bacteriotoxins                                              |
| ACHSI-102 | 1.3   | yocF | two-component sensor histidine kinase [YocG]                            |
| ACHSI-103 | 3.5.2 | yocG | two-component response regulator [YocF]                                 |
| ACHSI-104 | 5     | yodD | unknown conserved protein                                               |
| ACHSI-105 | 2.4   | yodR | butyrate-acetoacetate CoA-transferase                                   |
| ACHSI-106 | 2.4   | yodS | 3-oxoadipate CoA-transferase                                            |
| ACHSI-107 | 3.2   | mtbP | modification methylase Bsu                                              |
| ACHSI-108 | 5     | yomG | unknown conserved protein                                               |
| ACHSI-109 | 5     | yolD | unknown conserved protein                                               |
| ACHSI-110 | 3.8   | yppQ | peptide methionine sulfoxide reductase                                  |
| ACHSI-111 | 4.2   | mrsA | peptidyl methionine sulfoxide reductase                                 |
| ACHSI-112 | 5     | yppP | unknown conserved protein                                               |
| ACHSI-113 | 4.6   | yplQ | hemolysin III homolog                                                   |
| ACHSI-114 | 5     | ypgQ | unknown conserved protein                                               |
| ACHSI-115 | 3.1   | ypdQ | RNase HI                                                                |
| ACHSI-116 | 2.3   | xpt  | xanthine phosphoribosyltransferase                                      |
| ACHSI-117 | 5     | ypsA | unknown conserved protein                                               |
| ACHSI-118 | 1.8   | cotD | spore coat protein (inner)                                              |
| ACHSI-119 | 5     | yppC | unknown conserved protein                                               |
| ACHSI-120 | 5     | yqjX | unknown conserved protein                                               |
| ACHSI-121 | 3.2   | yqjH | DNA-damage repair protein                                               |
| ACHSI-122 | 4.2   | bmrU | multidrug resistance protein cotranscribed with bmr                     |
| ACHSI-123 | 3.5.2 | bmrR | transcriptional activator of the bmrUR operon                           |
| ACHSI-124 | 2.1.1 | yqiQ | phosphoenolpyruvate mutase                                              |
| ACHSI-125 | 5     | mmgE | unknown conserved protein                                               |
| ACHSI-126 | 2.1.3 | mmgD | citrate synthase III                                                    |
| ACHSI-127 | 3.5.2 | sinR | transcriptional regulator of post-exponential-phase responses genes     |
| ACHSI-128 | 1.8   | tasA | translocation-dependent antimicrobial spore component                   |
| ACHSI-129 | 1.6   | sipW | signal peptidase I                                                      |
| ACHSI-130 | 5     | yqgC | unknown conserved protein                                               |
| ACHSI-131 | 5     | yqxD | unknown conserved protein                                               |
| ACHSI-132 | 3.5.2 | arsR | arsenic resistance operon repressor                                     |
| ACHSI-133 | 5     | yqaC | unknown conserved protein                                               |
| ACHSI-134 | 3.5.2 | bltR | transcriptional regulator of the bltD operon                            |
| ACHSI-135 | 3.5.2 | azlB | transcriptional repressor of the azlBCD operon                          |
| ACHSI-136 | 3.5.2 | yraN | transcriptional regulator (LysR family)                                 |
| ACHSI-137 | 3.5.1 | sigV | RNA polymerase ECF-type sigma factor                                    |
| ACHSI-138 | 5     | ysfB | unknown conserved protein                                               |
| ACHSI-139 | 1.2   | araQ | L-arabinose transport (integral membrane protein)                       |
| ACHSI-140 | 1.3   | lytS | two-component sensor histidine kinase involved in the rate of autolysis |
| ACHSI-141 | 5     | ysaA | unknown conserved protein                                               |
| ACHSI-142 | 5     | ytzA | unknown conserved protein                                               |
| ACHSI-143 | 5     | ytCJ | unknown conserved protein                                               |
| ACHSI-144 | 5     | yttP | unknown conserved protein                                               |
| ACHSI-145 | 1.5   | ytxE | motility protein                                                        |
| ACHSI-146 | 1.5   | ytxD | flagellar motor apparatus                                               |
| ACHSI-147 | 1.4   | ytpP | thioredoxin H1                                                          |
| ACHSI-148 | 1.2   | opuD | glycine betaine transporter                                             |
| ACHSI-149 | 2.1.1 | ytiB | carbonic anhydrase                                                      |
| ACHSI-150 | 2.1.1 | glgP | glycogen phosphorylase                                                  |
| ACHSI-151 | 2.1.1 | glgA | starch (bacterial glycogen) synthase                                    |
| ACHSI-152 | 2.1.1 | glgC | glucose-1-phosphate adenyltransferase                                   |
| ACHSI-153 | 5     | yuaJ | unknown conserved protein                                               |
| ACHSI-154 | 5     | yubA | unknown conserved protein                                               |
| ACHSI-155 | 1.5   | tlpB | methyl-accepting chemotaxis protein                                     |
| ACHSI-156 | 1.5   | mcpA | methyl-accepting chemotaxis protein                                     |

|           |       |       |                                                                                                            |
|-----------|-------|-------|------------------------------------------------------------------------------------------------------------|
| ACHSI-157 | 1.5   | tlpA  | methyl-accepting chemotaxis protein                                                                        |
| ACHSI-158 | 1.5   | mcpB  | methyl-accepting chemotaxis protein                                                                        |
| ACHSI-159 | 1.8   | kapB  | activator of KinB in the initiation of sporulation                                                         |
| ACHSI-160 | 1.3   | yufL  | two-component sensor histidine kinase [YufM]                                                               |
| ACHSI-161 | 3.5.2 | yufM  | two-component response regulator [YufL]                                                                    |
| ACHSI-162 | 1.2   | maeN  | Na <sup>+</sup> /malate symporter                                                                          |
| ACHSI-163 | 5     | yueI  | unknown conserved protein                                                                                  |
| ACHSI-164 | 5     | yukA  | unknown conserved protein                                                                                  |
| ACHSI-165 | 5     | yukB  | unknown conserved protein                                                                                  |
| ACHSI-166 | 5     | yukE  | unknown conserved protein                                                                                  |
| ACHSI-167 | 5     | yuiF  | unknown conserved protein                                                                                  |
| ACHSI-168 | 3.5.2 | paiA  | transcriptional repressor of sporulation, septation and degradative enzyme genes                           |
| ACHSI-169 | 2.2   | yurG  | aspartate aminotransferase                                                                                 |
| ACHSI-170 | 1.2   | yurN  | sugar permease                                                                                             |
| ACHSI-171 | 2.2   | yusX  | oligoendopeptidase                                                                                         |
| ACHSI-172 | 3.5.2 | cssR  | two-component response regulator involved in the control of cellular responses to protein secretion stress |
| ACHSI-173 | 1.9   | gerAB | germination response to L-alanine                                                                          |
| ACHSI-174 | 5     | yvqG  | unknown conserved protein                                                                                  |
| ACHSI-175 | 1.2   | fhuG  | ABC transporter (permease) ferrichrome                                                                     |
| ACHSI-176 | 4.4   | yvaN  | immunity repressor protein                                                                                 |
| ACHSI-177 | 4.4   | yvaO  | immunity repressor protein                                                                                 |
| ACHSI-178 | 5     | yvbK  | unknown conserved protein                                                                                  |
| ACHSI-179 | 3.5.2 | yvfU  | two-component response regulator [YvfT]                                                                    |
| ACHSI-180 | 1.3   | yvfT  | two-component sensor histidine kinase [YvfU]                                                               |
| ACHSI-181 | 3.9   | yvdS  | molecular chaperone                                                                                        |
| ACHSI-182 | 5     | yvdQ  | unknown conserved protein                                                                                  |
| ACHSI-183 | 2.1.1 | yvdA  | carbonic anhydrase                                                                                         |
| ACHSI-184 | 5     | yvIC  | unknown conserved protein                                                                                  |
| ACHSI-185 | 5     | yvIB  | unknown conserved protein                                                                                  |
| ACHSI-186 | 3.5.2 | yvkB  | transcriptional regulator (TetR/AcrR family)                                                               |
| ACHSI-187 | 1.1   | tuaG  | biosynthesis of teichuronic acid                                                                           |
| ACHSI-188 | 1.9   | gerBB | germination response to the combination of glucose, fructose, L-asparagine, and KCl                        |
| ACHSI-189 | 3.5.2 | ywtF  | transcriptional regulator                                                                                  |
| ACHSI-190 | 5     | ywtE  | unknown conserved protein                                                                                  |
| ACHSI-191 | 1.2   | ywrK  | arsenical pump membrane protein                                                                            |
| ACHSI-192 | 3.5.2 | ywrC  | transcriptional regulator (Lrp/AsnC family)                                                                |
| ACHSI-193 | 5     | ywpJ  | unknown conserved protein                                                                                  |
| ACHSI-194 | 3.5.2 | glcR  | transcriptional repressor involved in the expression of the phosphotransferase system                      |
| ACHSI-195 | 1.3   | ywpD  | two-component sensor histidine kinase                                                                      |
| ACHSI-196 | 5     | ywkB  | unknown conserved protein                                                                                  |
| ACHSI-197 | 1.2   | ywjA  | ABC transporter (ATP-binding protein)                                                                      |
| ACHSI-198 | 5     | ywgB  | unknown conserved protein                                                                                  |
| ACHSI-199 | 1.8   | spsL  | spore coat polysaccharide synthesis                                                                        |
| ACHSI-200 | 1.8   | spsK  | spore coat polysaccharide synthesis                                                                        |
| ACHSI-201 | 1.8   | spsI  | spore coat polysaccharide synthesis                                                                        |
| ACHSI-202 | 1.8   | spsD  | spore coat polysaccharide synthesis                                                                        |
| ACHSI-203 | 2.1.1 | ywdH  | aldehyde dehydrogenase                                                                                     |
| ACHSI-204 | 2.2   | vpr   | minor extracellular serine protease                                                                        |
| ACHSI-205 | 1.2   | licA  | PTS lichenan-specific enzyme IIA component                                                                 |
| ACHSI-206 | 1.2   | licB  | PTS lichenan-specific enzyme IIB component                                                                 |
| ACHSI-207 | 4.2   | katX  | major catalase in spores                                                                                   |
| ACHSI-208 | 1.2   | cydD  | ABC transporter (ATP-binding protein) required for expression of cytochrome bd                             |
| ACHSI-209 | 1.2   | cydC  | ABC transporter (ATP-binding protein) required for expression of cytochrome bd                             |
| ACHSI-210 | 1.2   | yxkJ  | metabolite-sodium symport                                                                                  |
| ACHSI-211 | 5     | yxjH  | unknown conserved protein                                                                                  |
| ACHSI-212 | 5     | yxjG  | unknown conserved protein                                                                                  |
| ACHSI-213 | 2.4   | scoB  | probable succinyl CoA:3-oxoacid CoA-transferase (subunit B)                                                |
| ACHSI-214 | 5     | yxjC  | unknown conserved protein                                                                                  |
| ACHSI-215 | 4.2   | katE  | catalase 2                                                                                                 |
| ACHSI-216 | 5     | yxjO  | unknown conserved protein                                                                                  |
| ACHSI-217 | 5     | yxjH  | unknown conserved protein                                                                                  |
| ACHSI-218 | 5     | yxbF  | unknown conserved protein                                                                                  |
| ACHSI-219 | 5     | yxaC  | unknown conserved protein                                                                                  |
| ACHSI-220 | 3.5.2 | yybA  | transcriptional regulator (MarR family)                                                                    |
| ACHSI-221 | 5     | yyaB  | unknown conserved protein                                                                                  |

Gene is assigned based on *B. subtilis* genome database (SubtiList, <http://www.pasteur.fr/Bio/SubtiList.html>).
