# Supplementary material
Source: PubMed Central journal article supplement (PMC535678)
Supplement: nar_32_21_6292__5.pdf [file nar_32_21_6292__5.pdf]

**Supplementary Table S3.** List of the unique genes of *G. kaustophilus* which has no orthologous relationship to 5 other bacilli

| I.D. | GK gene | position (from) | position (to) | function | product                                                                                                      |
|------|---------|-----------------|---------------|----------|--------------------------------------------------------------------------------------------------------------|
| K-1  | GK0015  | 24791           | 26155         | 5        | unknown conserved protein                                                                                    |
| K-2  | GK0145  | 150099          | 151757        | 4.5      | transposase                                                                                                  |
| K-3  | GK0146  | 151789          | 151974        | 1.9      | spore germination protein precursor (N-term divided by IS)                                                   |
| K-4  | GK0156  | 169582          | 169719        | 6        | unknown                                                                                                      |
| K-5  | GK0157  | 169853          | 170653        | 5        | unknown conserved protein                                                                                    |
| K-6  | GK0158  | 170646          | 171695        | 4.5      | transposase of <i>IS1604</i> -like element                                                                   |
| K-7  | GK0161  | 173028          | 173336        | 6        | unknown                                                                                                      |
| K-8  | GK0162  | 173479          | 174042        | 5        | unknown conserved protein                                                                                    |
| K-9  | GK0163  | 174102          | 174791        | 4.5      | transposase                                                                                                  |
| K-10 | GK0164  | 174906          | 176003        | 5        | unknown conserved protein                                                                                    |
| K-11 | GK0166  | 177247          | 177786        | 6        | unknown                                                                                                      |
| K-12 | GK0168  | 179528          | 179734        | 5        | unknown conserved protein                                                                                    |
| K-13 | GK0171  | 182500          | 182955        | 5        | unknown conserved protein                                                                                    |
| K-14 | GK0173  | 183729          | 183944        | 5        | unknown conserved protein                                                                                    |
| K-15 | GK0175  | 185011          | 186669        | 4.5      | transposase                                                                                                  |
| K-16 | GK0176  | 186825          | 187346        | 6        | unknown                                                                                                      |
| K-17 | GK0195  | 205733          | 206035        | 6        | unknown                                                                                                      |
| K-18 | GK0196  | 206111          | 208174        | 3.5.2    | sigma-L-dependent transcriptional regulator                                                                  |
| K-19 | GK0198  | 209695          | 209949        | 6        | unknown                                                                                                      |
| K-20 | GK0200  | 211545          | 212756        | 2.1.1    | alcohol dehydrogenase                                                                                        |
| K-21 | GK0204  | 214705          | 214995        | 6        | unknown                                                                                                      |
| K-22 | GK0207  | 216465          | 216872        | 6        | unknown                                                                                                      |
| K-23 | GK0215  | 227296          | 228279        | 1.8      | sporulation-control protein                                                                                  |
| K-24 | GK0220  | 232629          | 233387        | 2.1.1    | chitoooligosaccharide deacetylase                                                                            |
| K-25 | GK0221  | 233398          | 233994        | 2.6      | alkaline phosphatase                                                                                         |
| K-26 | GK0230  | 242294          | 242521        | 6        | unknown                                                                                                      |
| K-27 | GK0243  | 261766          | 261918        | 5        | unknown conserved protein                                                                                    |
| K-28 | GK0247  | 263801          | 263965        | 6        | unknown                                                                                                      |
| K-29 | GK0256  | 281982          | 282431        | 3.9      | small heat shock protein                                                                                     |
| K-30 | GK0269  | 295801          | 295965        | 6        | unknown                                                                                                      |
| K-31 | GK0280  | 307773          | 308279        | 6        | unknown                                                                                                      |
| K-32 | GK0286  | 314934          | 315104        | 4.3      | lantibiotic precursor                                                                                        |
| K-33 | GK0287  | 315293          | 315682        | 6        | unknown                                                                                                      |
| K-34 | GK0289  | 316671          | 317405        | 6        | unknown                                                                                                      |
| K-35 | GK0290  | 317402          | 318103        | 6        | unknown                                                                                                      |
| K-36 | GK0292  | 318774          | 318941        | 6        | unknown                                                                                                      |
| K-37 | GK0293  | 319184          | 320545        | 4.5      | transposase of <i>IS231E</i> -like element                                                                   |
| K-38 | GK0294  | 320984          | 321136        | 4.3      | lantibiotic precursor                                                                                        |
| K-39 | GK0295  | 321329          | 322777        | 4.5      | transposase of <i>ISBst12</i> -like element                                                                  |
| K-40 | GK0296  | 322998          | 323237        | 6        | unknown                                                                                                      |
| K-41 | GK0298  | 324051          | 324278        | 6        | unknown                                                                                                      |
| K-42 | GK0299  | 324278          | 324505        | 6        | unknown                                                                                                      |
| K-43 | GK0301  | 326841          | 328229        | 4.5      | transposase                                                                                                  |
| K-44 | GK0302  | 330184          | 331371        | 5        | unknown conserved protein                                                                                    |
| K-45 | GK0303  | 331436          | 333265        | 1.2      | ABC transporter (ATP-binding protein) lantibiotic                                                            |
| K-46 | GK0305  | 334618          | 334818        | 6        | unknown                                                                                                      |
| K-47 | GK0309  | 338625          | 339008        | 4.3      | lantibiotic biosynthesis protein                                                                             |
| K-48 | GK0317  | 346233          | 347723        | 5        | unknown conserved protein                                                                                    |
| K-49 | GK0318  | 347726          | 348922        | 5        | unknown conserved protein                                                                                    |
| K-50 | GK0320  | 353000          | 354220        | 5        | unknown conserved protein                                                                                    |
| K-51 | GK0321  | 354288          | 354665        | 4.5      | transposase                                                                                                  |
| K-52 | GK0322  | 355570          | 355794        | 6        | unknown                                                                                                      |
| K-53 | GK0326  | 359118          | 359642        | 6        | unknown                                                                                                      |
| K-54 | GK0327  | 359842          | 360165        | 6        | unknown                                                                                                      |
| K-55 | GK0329  | 362937          | 363209        | 6        | unknown                                                                                                      |
| K-56 | GK0331  | 364862          | 365533        | 3.5.2    | transcriptional regulator                                                                                    |
| K-57 | GK0332  | 365707          | 366912        | 4.1      | serine protease Do                                                                                           |
| K-58 | GK0333  | 366969          | 367325        | 6        | unknown                                                                                                      |
| K-59 | GK0334  | 367765          | 368418        | 6        | unknown                                                                                                      |
| K-60 | GK0337  | 370659          | 371048        | 5        | unknown conserved protein                                                                                    |
| K-61 | GK0338  | 371185          | 372051        | 5        | unknown conserved protein                                                                                    |
| K-62 | GK0343  | 377195          | 378649        | 3.2      | type I restriction modification system M subunit (site-specific DNA-methyltransferase subunit) (EC 2.1.1.72) |
| K-63 | GK0348  | 386664          | 387227        | 5        | unknown conserved protein                                                                                    |
| K-64 | GK0349  | 387370          | 388617        | 4.5      | transposase                                                                                                  |
| K-65 | GK0350  | 388610          | 389410        | 5        | unknown conserved protein                                                                                    |
| K-66 | GK0353  | 392253          | 392417        | 5        | unknown conserved protein                                                                                    |

|       |        |        |        |       |                                             |
|-------|--------|--------|--------|-------|---------------------------------------------|
| K-67  | GK0357 | 396133 | 397521 | 3.6   | RNA methyltransferase                       |
| K-68  | GK0361 | 401201 | 402388 | 2.1.1 | glycosyltransferases                        |
| K-69  | GK0362 | 402369 | 403484 | 5     | unknown conserved protein                   |
| K-70  | GK0363 | 403435 | 404844 | 2.1.1 | phosphomannomutase                          |
| K-71  | GK0364 | 405063 | 406712 | 6     | unknown                                     |
| K-72  | GK0365 | 406956 | 407528 | 5     | unknown conserved protein                   |
| K-73  | GK0366 | 407377 | 407709 | 3.5.2 | anti-sigma factor antagonist                |
| K-74  | GK0369 | 410600 | 411853 | 1.5   | methyl-accepting chemotaxis protein         |
| K-75  | GK0388 | 434051 | 434212 | 6     | unknown                                     |
| K-76  | GK0389 | 434830 | 435150 | 6     | unknown                                     |
| K-77  | GK0390 | 435262 | 436449 | 5     | unknown conserved protein                   |
| K-78  | GK0391 | 436734 | 437426 | 5     | unknown conserved protein                   |
| K-79  | GK0392 | 437943 | 438251 | 6     | unknown                                     |
| K-80  | GK0397 | 442382 | 442642 | 6     | unknown                                     |
| K-81  | GK0403 | 449777 | 450430 | 6     | unknown                                     |
| K-82  | GK0410 | 455566 | 455712 | 6     | unknown                                     |
| K-83  | GK0417 | 460532 | 460708 | 6     | unknown                                     |
| K-84  | GK0437 | 479553 | 479837 | 6     | unknown                                     |
| K-85  | GK0440 | 482730 | 483113 | 6     | unknown                                     |
| K-86  | GK0457 | 497684 | 498046 | 6     | unknown                                     |
| K-87  | GK0466 | 506829 | 507020 | 1.8   | gamma-type small acid-soluble spore protein |
| K-88  | GK0467 | 507248 | 507457 | 6     | unknown                                     |
| K-89  | GK0490 | 538154 | 538414 | 6     | unknown                                     |
| K-90  | GK0491 | 538780 | 539085 | 6     | unknown                                     |
| K-91  | GK0496 | 540660 | 540821 | 6     | unknown                                     |
| K-92  | GK0497 | 540858 | 541163 | 6     | unknown                                     |
| K-93  | GK0498 | 541169 | 541537 | 6     | unknown                                     |
| K-94  | GK0499 | 541785 | 542126 | 6     | unknown                                     |
| K-95  | GK0500 | 542198 | 542413 | 5     | unknown conserved protein                   |
| K-96  | GK0501 | 542513 | 542962 | 6     | unknown                                     |
| K-97  | GK0502 | 543042 | 543338 | 6     | unknown                                     |
| K-98  | GK0504 | 543772 | 543969 | 6     | unknown                                     |
| K-99  | GK0505 | 544032 | 544259 | 6     | unknown                                     |
| K-100 | GK0506 | 544246 | 544767 | 4.4   | phage-related protein                       |
| K-101 | GK0507 | 544785 | 544964 | 6     | unknown                                     |
| K-102 | GK0508 | 544964 | 545131 | 6     | unknown                                     |
| K-103 | GK0509 | 545323 | 545634 | 6     | unknown                                     |
| K-104 | GK0510 | 545892 | 546026 | 6     | unknown                                     |
| K-105 | GK0511 | 546016 | 546243 | 6     | unknown                                     |
| K-106 | GK0513 | 547514 | 547702 | 6     | unknown                                     |
| K-107 | GK0514 | 547771 | 547941 | 6     | unknown                                     |
| K-108 | GK0515 | 547941 | 548423 | 5     | unknown conserved protein                   |
| K-109 | GK0516 | 548425 | 548685 | 6     | unknown                                     |
| K-110 | GK0517 | 548902 | 549090 | 4.4   | phage-related protein (PBSX-like element)   |
| K-111 | GK0518 | 549339 | 549542 | 6     | unknown                                     |
| K-112 | GK0520 | 550452 | 550640 | 5     | unknown conserved protein                   |
| K-113 | GK0523 | 551788 | 552081 | 5     | unknown conserved protein                   |
| K-114 | GK0524 | 552279 | 553022 | 5     | unknown conserved protein                   |
| K-115 | GK0525 | 553466 | 553711 | 6     | unknown                                     |
| K-116 | GK0527 | 554399 | 554764 | 6     | unknown                                     |
| K-117 | GK0538 | 562125 | 562289 | 6     | unknown                                     |
| K-118 | GK0540 | 567998 | 568867 | 4.4   | phage-related protein (tail protein)        |
| K-119 | GK0541 | 568880 | 569566 | 4.4   | phage-related protein                       |
| K-120 | GK0542 | 569576 | 570931 | 4.4   | phage-related protein                       |
| K-121 | GK0543 | 570945 | 573557 | 4.4   | phage-related protein                       |
| K-122 | GK0544 | 573574 | 573810 | 6     | unknown                                     |
| K-123 | GK0545 | 573814 | 574182 | 6     | unknown                                     |
| K-124 | GK0546 | 574182 | 575189 | 6     | unknown                                     |
| K-125 | GK0547 | 575202 | 575528 | 6     | unknown                                     |
| K-126 | GK0550 | 576964 | 577311 | 5     | unknown conserved protein                   |
| K-127 | GK0552 | 577917 | 578240 | 6     | unknown                                     |
| K-128 | GK0554 | 579401 | 580081 | 5     | unknown conserved protein                   |
| K-129 | GK0555 | 580097 | 580270 | 6     | unknown                                     |
| K-130 | GK0556 | 580527 | 581219 | 5     | unknown conserved protein                   |
| K-131 | GK0557 | 581378 | 581695 | 6     | unknown                                     |
| K-132 | GK0572 | 595983 | 596225 | 6     | unknown                                     |
| K-133 | GK0575 | 598127 | 599998 | 5     | unknown conserved protein                   |
| K-134 | GK0576 | 600788 | 601369 | 4.5   | transposase of IS654 -like element          |
| K-135 | GK0591 | 615873 | 616415 | 5     | unknown conserved protein                   |
| K-136 | GK0592 | 616525 | 617319 | 5     | unknown conserved protein                   |

|       |        |        |        |       |                                                                              |
|-------|--------|--------|--------|-------|------------------------------------------------------------------------------|
| K-137 | GK0594 | 618168 | 619829 | 3.3   | single-stranded-DNA-specific exonuclease                                     |
| K-138 | GK0596 | 621812 | 622054 | 6     | unknown                                                                      |
| K-139 | GK0597 | 622142 | 622489 | 3.5.2 | transcriptional regulator                                                    |
| K-140 | GK0598 | 622654 | 622818 | 6     | unknown                                                                      |
| K-141 | GK0599 | 622815 | 624326 | 4.4   | integrase (resolvase family)                                                 |
| K-142 | GK0600 | 624313 | 625833 | 4.4   | cassette chromosome recombinase B                                            |
| K-143 | GK0601 | 626592 | 627224 | 6     | unknown                                                                      |
| K-144 | GK0602 | 627217 | 628182 | 6     | unknown                                                                      |
| K-145 | GK0606 | 631525 | 631626 | 6     | unknown                                                                      |
| K-146 | GK0607 | 631715 | 632005 | 5     | unknown conserved protein                                                    |
| K-147 | GK0611 | 633947 | 634378 | 6     | unknown                                                                      |
| K-148 | GK0627 | 650824 | 651000 | 6     | unknown                                                                      |
| K-149 | GK0634 | 656113 | 656514 | 6     | unknown                                                                      |
| K-150 | GK0647 | 669145 | 669279 | 5     | unknown conserved protein                                                    |
| K-151 | GK0651 | 671506 | 671691 | 6     | unknown                                                                      |
| K-152 | GK0655 | 673300 | 673389 | 5     | unknown conserved protein                                                    |
| K-153 | GK0665 | 683501 | 683977 | 6     | unknown                                                                      |
| K-154 | GK0669 | 687340 | 688347 | 1.2   | ABC transporter (substrate-binding protein)                                  |
| K-155 | GK0670 | 688477 | 689469 | 1.2   | ABC transporter (permease)                                                   |
| K-156 | GK0671 | 689435 | 690232 | 1.2   | ABC transporter (ATP-binding protein)                                        |
| K-157 | GK0675 | 692418 | 693008 | 4.2   | manganese oxidation                                                          |
| K-158 | GK0691 | 711006 | 711230 | 1.9   | spore germination protein                                                    |
| K-159 | GK0692 | 711381 | 711605 | 1.9   | spore germination protein                                                    |
| K-160 | GK0712 | 737253 | 738563 | 2.1.2 | pyruvate dehydrogenase E2 (dihydrolipoamide acetyltransferase) (EC 2.3.1.12) |
| K-161 | GK0714 | 739657 | 739833 | 6     | unknown                                                                      |
| K-162 | GK0715 | 739830 | 739985 | 6     | unknown                                                                      |
| K-163 | GK0718 | 745599 | 745982 | 6     | unknown                                                                      |
| K-164 | GK0719 | 746516 | 746746 | 4.3   | circularin A precursor                                                       |
| K-165 | GK0720 | 746814 | 748433 | 6     | unknown                                                                      |
| K-166 | GK0721 | 748447 | 748956 | 5     | unknown conserved protein                                                    |
| K-167 | GK0722 | 749145 | 749795 | 1.2   | ABC transporter (ATP-binding protein)                                        |
| K-168 | GK0732 | 761040 | 761342 | 6     | unknown                                                                      |
| K-169 | GK0733 | 761459 | 761779 | 6     | unknown                                                                      |
| K-170 | GK0735 | 762525 | 762701 | 6     | unknown                                                                      |
| K-171 | GK0737 | 763553 | 764278 | 1.2   | ABC transporter (ATP-binding protein) multidrug                              |
| K-172 | GK0741 | 767492 | 768202 | 5     | unknown conserved protein                                                    |
| K-173 | GK0744 | 769585 | 770679 | 5     | unknown conserved protein                                                    |
| K-174 | GK0751 | 777074 | 777319 | 6     | unknown                                                                      |
| K-175 | GK0752 | 777417 | 778163 | 4.6   | huntingtin interacting protein E-like protein                                |
| K-176 | GK0754 | 778682 | 779923 | 5     | unknown conserved protein                                                    |
| K-177 | GK0755 | 779929 | 780138 | 6     | unknown                                                                      |
| K-178 | GK0756 | 780125 | 780373 | 6     | unknown                                                                      |
| K-179 | GK0758 | 781526 | 783898 | 1.4   | nitric oxide reductase cytochrome b subunit (EC 1.7.99.7)                    |
| K-180 | GK0759 | 784037 | 784240 | 6     | unknown                                                                      |
| K-181 | GK0761 | 785713 | 785880 | 6     | unknown                                                                      |
| K-182 | GK0762 | 786010 | 786243 | 5     | unknown conserved protein                                                    |
| K-183 | GK0764 | 786937 | 787101 | 6     | unknown                                                                      |
| K-184 | GK0768 | 792086 | 792784 | 3.5.2 | transcriptional regulator of anaerobic genes (FNR/CRP family)                |
| K-185 | GK0777 | 799483 | 800292 | 1.1   | cell wall-associated protein precursor                                       |
| K-186 | GK0778 | 800349 | 801536 | 5     | unknown conserved protein                                                    |
| K-187 | GK0779 | 805467 | 806018 | 5     | unknown conserved protein                                                    |
| K-188 | GK0780 | 806172 | 807422 | 4.5   | transposase of <i>IS1604</i> -like element                                   |
| K-189 | GK0781 | 807415 | 808215 | 5     | unknown conserved protein                                                    |
| K-190 | GK0782 | 808558 | 810639 | 6     | unknown                                                                      |
| K-191 | GK0785 | 813148 | 813816 | 6     | unknown                                                                      |
| K-192 | GK0787 | 816401 | 816658 | 6     | unknown                                                                      |
| K-193 | GK0789 | 818120 | 818266 | 6     | unknown                                                                      |
| K-194 | GK0797 | 827694 | 827840 | 6     | unknown                                                                      |
| K-195 | GK0800 | 830812 | 830997 | 6     | unknown                                                                      |
| K-196 | GK0803 | 832281 | 832529 | 5     | unknown conserved protein                                                    |
| K-197 | GK0807 | 836084 | 836290 | 5     | unknown conserved protein                                                    |
| K-198 | GK0810 | 838500 | 838874 | 5     | unknown conserved protein                                                    |
| K-199 | GK0823 | 852563 | 852760 | 6     | unknown                                                                      |
| K-200 | GK0841 | 869239 | 870321 | 2.1.1 | glycosyltransferase                                                          |
| K-201 | GK0842 | 870328 | 871323 | 5     | unknown conserved protein                                                    |
| K-202 | GK0843 | 871485 | 871787 | 6     | unknown                                                                      |
| K-203 | GK0845 | 872300 | 872470 | 6     | unknown                                                                      |
| K-204 | GK0848 | 874369 | 874701 | 6     | unknown                                                                      |
| K-205 | GK0849 | 875084 | 875314 | 6     | unknown                                                                      |

|       |        |         |         |     |                                                              |
|-------|--------|---------|---------|-----|--------------------------------------------------------------|
| K-206 | GK0850 | 875342  | 875545  | 5   | unknown conserved protein                                    |
| K-207 | GK0858 | 879459  | 879629  | 6   | unknown                                                      |
| K-208 | GK0860 | 880218  | 880454  | 6   | unknown                                                      |
| K-209 | GK0861 | 880534  | 880659  | 5   | unknown conserved protein                                    |
| K-210 | GK0871 | 887545  | 888645  | 5   | unknown conserved protein                                    |
| K-211 | GK0872 | 888642  | 889700  | 5   | unknown conserved protein                                    |
| K-212 | GK0873 | 889984  | 890148  | 6   | unknown                                                      |
| K-213 | GK0874 | 890204  | 890722  | 6   | unknown                                                      |
| K-214 | GK0875 | 890765  | 891496  | 6   | unknown                                                      |
| K-215 | GK0876 | 891688  | 891939  | 6   | unknown                                                      |
| K-216 | GK0879 | 895672  | 896229  | 5   | unknown conserved protein                                    |
| K-217 | GK0880 | 896370  | 897620  | 4.5 | transposase of <i>IS1604</i> - like element                  |
| K-218 | GK0881 | 897613  | 898413  | 5   | unknown conserved protein                                    |
| K-219 | GK0882 | 898415  | 898582  | 6   | unknown                                                      |
| K-220 | GK0883 | 898846  | 899532  | 5   | unknown conserved protein                                    |
| K-221 | GK0885 | 904348  | 906762  | 5   | unknown conserved protein                                    |
| K-222 | GK0887 | 908410  | 910068  | 5   | unknown conserved protein                                    |
| K-223 | GK0888 | 910175  | 911842  | 4.5 | transposase                                                  |
| K-224 | GK0893 | 916554  | 916682  | 6   | unknown                                                      |
| K-225 | GK0894 | 916745  | 917245  | 1.4 | menaquinol-cytochrome c reductase iron-sulfur subunit        |
| K-226 | GK0914 | 939902  | 940255  | 6   | unknown                                                      |
| K-227 | GK0915 | 940392  | 940856  | 6   | unknown                                                      |
| K-228 | GK0916 | 941026  | 941880  | 5   | unknown conserved protein                                    |
| K-229 | GK0917 | 941896  | 942576  | 6   | unknown                                                      |
| K-230 | GK0921 | 945597  | 945770  | 6   | unknown                                                      |
| K-231 | GK0925 | 948634  | 949446  | 5   | unknown conserved protein                                    |
| K-232 | GK0931 | 954729  | 954980  | 6   | unknown                                                      |
| K-233 | GK0935 | 957209  | 957460  | 6   | unknown                                                      |
| K-234 | GK0936 | 957594  | 957893  | 6   | unknown                                                      |
| K-235 | GK0939 | 960642  | 960797  | 5   | unknown conserved protein                                    |
| K-236 | GK0941 | 960954  | 961106  | 6   | unknown                                                      |
| K-237 | GK0943 | 963050  | 963133  | 6   | unknown                                                      |
| K-238 | GK0959 | 979459  | 980028  | 5   | unknown conserved protein                                    |
| K-239 | GK0965 | 988493  | 988900  | 5   | unknown conserved protein                                    |
| K-240 | GK0967 | 989708  | 990223  | 6   | unknown                                                      |
| K-241 | GK0971 | 994803  | 996413  | 5   | unknown conserved protein                                    |
| K-242 | GK0983 | 1005264 | 1005938 | 6   | unknown                                                      |
| K-243 | GK0988 | 1010175 | 1010303 | 6   | unknown                                                      |
| K-244 | GK0992 | 1014608 | 1015315 | 6   | unknown                                                      |
| K-245 | GK0994 | 1015826 | 1015990 | 6   | unknown                                                      |
| K-246 | GK0997 | 1018378 | 1018929 | 5   | unknown conserved protein                                    |
| K-247 | GK0998 | 1019010 | 1019201 | 6   | unknown                                                      |
| K-248 | GK1000 | 1026535 | 1026978 | 6   | unknown                                                      |
| K-249 | GK1001 | 1026765 | 1026989 | 6   | unknown                                                      |
| K-250 | GK1002 | 1027256 | 1028914 | 4.5 | transposase                                                  |
| K-251 | GK1003 | 1029307 | 1029630 | 6   | unknown                                                      |
| K-252 | GK1007 | 1033818 | 1034210 | 6   | unknown                                                      |
| K-253 | GK1009 | 1035332 | 1036444 | 3.6 | tRNA (5-methylaminomethyl-2-thiouridylate)-methyltransferase |
| K-254 | GK1010 | 1036679 | 1037557 | 4.5 | transposase                                                  |
| K-255 | GK1011 | 1037575 | 1037946 | 6   | unknown                                                      |
| K-256 | GK1012 | 1037949 | 1039607 | 4.5 | transposase                                                  |
| K-257 | GK1013 | 1039636 | 1040115 | 5   | unknown conserved protein                                    |
| K-258 | GK1014 | 1040174 | 1040620 | 5   | unknown conserved protein                                    |
| K-259 | GK1015 | 1041475 | 1041903 | 6   | unknown                                                      |
| K-260 | GK1016 | 1042657 | 1044021 | 5   | unknown conserved protein                                    |
| K-261 | GK1021 | 1048449 | 1048703 | 6   | unknown                                                      |
| K-262 | GK1022 | 1048678 | 1048929 | 6   | unknown                                                      |
| K-263 | GK1025 | 1053251 | 1053469 | 6   | unknown                                                      |
| K-264 | GK1036 | 1064132 | 1064359 | 6   | unknown                                                      |
| K-265 | GK1046 | 1074422 | 1074655 | 6   | unknown                                                      |
| K-266 | GK1055 | 1080943 | 1081014 | 6   | unknown                                                      |
| K-267 | GK1062 | 1088262 | 1088504 | 5   | unknown conserved protein                                    |
| K-268 | GK1088 | 1112648 | 1112953 | 6   | unknown                                                      |
| K-269 | GK1116 | 1136763 | 1137224 | 6   | unknown                                                      |
| K-270 | GK1129 | 1149167 | 1149385 | 5   | unknown conserved protein                                    |
| K-271 | GK1137 | 1156615 | 1156773 | 6   | unknown                                                      |
| K-272 | GK1138 | 1157063 | 1158931 | 6   | unknown                                                      |
| K-273 | GK1139 | 1158931 | 1159530 | 6   | unknown                                                      |
| K-274 | GK1140 | 1159668 | 1160063 | 6   | unknown                                                      |
| K-275 | GK1141 | 1160176 | 1162194 | 6   | unknown                                                      |

|       |        |         |         |       |                                                                          |
|-------|--------|---------|---------|-------|--------------------------------------------------------------------------|
| K-276 | GK1142 | 1162178 | 1163044 | 1.2   | ABC transporter (ATP-binding protein)                                    |
| K-277 | GK1143 | 1163037 | 1163669 | 6     | unknown                                                                  |
| K-278 | GK1144 | 1163722 | 1163862 | 6     | unknown                                                                  |
| K-279 | GK1156 | 1176582 | 1176920 | 6     | unknown                                                                  |
| K-280 | GK1158 | 1177755 | 1178030 | 6     | unknown                                                                  |
| K-281 | GK1159 | 1178305 | 1178547 | 6     | unknown                                                                  |
| K-282 | GK1160 | 1178990 | 1179232 | 5     | unknown conserved protein                                                |
| K-283 | GK1162 | 1180889 | 1181452 | 5     | unknown conserved protein                                                |
| K-284 | GK1247 | 1261549 | 1261794 | 6     | unknown                                                                  |
| K-285 | GK1296 | 1313922 | 1315403 | 4.5   | group II intron reverse transcriptase/maturase                           |
| K-286 | GK1309 | 1332247 | 1332612 | 6     | unknown                                                                  |
| K-287 | GK1317 | 1341462 | 1342535 | 2.4   | acyl-CoA transferases/carnitine dehydratase (EC 5.1.-.-)                 |
| K-288 | GK1319 | 1344173 | 1345018 | 2.4   | 3-hydroxybutyryl-CoA dehydrogenase (EC 1.1.1.157)                        |
| K-289 | GK1321 | 1346454 | 1347023 | 5     | unknown conserved protein                                                |
| K-290 | GK1338 | 1362470 | 1362559 | 6     | unknown                                                                  |
| K-291 | GK1348 | 1370756 | 1370893 | 5     | unknown conserved protein                                                |
| K-292 | GK1353 | 1373753 | 1373962 | 6     | unknown                                                                  |
| K-293 | GK1357 | 1377180 | 1377446 | 5     | unknown conserved protein                                                |
| K-294 | GK1358 | 1377575 | 1377985 | 1.8   | sporulation control protein                                              |
| K-295 | GK1361 | 1380635 | 1382089 | 5     | unknown conserved protein                                                |
| K-296 | GK1363 | 1383547 | 1384029 | 5     | unknown conserved protein                                                |
| K-297 | GK1365 | 1384943 | 1385914 | 2.2   | formiminoglutamase (EC 3.5.3.8)                                          |
| K-298 | GK1366 | 1385925 | 1387400 | 6     | unknown                                                                  |
| K-299 | GK1372 | 1394029 | 1394484 | 6     | unknown                                                                  |
| K-300 | GK1373 | 1395145 | 1396050 | 5     | unknown conserved protein                                                |
| K-301 | GK1375 | 1396592 | 1397899 | 6     | unknown                                                                  |
| K-302 | GK1377 | 1399554 | 1399985 | 6     | unknown                                                                  |
| K-303 | GK1383 | 1410700 | 1413123 | 6     | unknown                                                                  |
| K-304 | GK1384 | 1413503 | 1415647 | 6     | unknown                                                                  |
| K-305 | GK1386 | 1417264 | 1417851 | 6     | unknown                                                                  |
| K-306 | GK1387 | 1417962 | 1418195 | 6     | unknown                                                                  |
| K-307 | GK1388 | 1418291 | 1419949 | 6     | unknown                                                                  |
| K-308 | GK1389 | 1420382 | 1420900 | 6     | unknown                                                                  |
| K-309 | GK1391 | 1422127 | 1423431 | 2.2   | acetamidase/formamidase                                                  |
| K-310 | GK1392 | 1423826 | 1425238 | 3.7.2 | glutamyl-tRNA(Gln) amidotransferase subunit A                            |
| K-311 | GK1393 | 1425308 | 1425466 | 6     | unknown                                                                  |
| K-312 | GK1394 | 1425665 | 1426363 | 6     | unknown                                                                  |
| K-313 | GK1395 | 1426607 | 1427098 | 6     | unknown                                                                  |
| K-314 | GK1397 | 1429081 | 1429284 | 6     | unknown                                                                  |
| K-315 | GK1400 | 1431186 | 1431980 | 2.2   | S-adenosylmethionine decarboxylase proenzyme                             |
| K-316 | GK1402 | 1433326 | 1433583 | 6     | unknown                                                                  |
| K-317 | GK1403 | 1433814 | 1435475 | 5     | unknown conserved protein                                                |
| K-318 | GK1404 | 1435635 | 1436105 | 5     | unknown conserved protein                                                |
| K-319 | GK1412 | 1444624 | 1445205 | 5     | unknown conserved protein                                                |
| K-320 | GK1413 | 1445186 | 1445350 | 6     | unknown                                                                  |
| K-321 | GK1414 | 1445590 | 1446318 | 6     | unknown                                                                  |
| K-322 | GK1415 | 1446490 | 1450257 | 6     | unknown                                                                  |
| K-323 | GK1416 | 1450524 | 1451960 | 3.2   | type III restriction-modification system, methyltransferase (EC 2.1.1.-) |
| K-324 | GK1417 | 1452063 | 1452374 | 6     | unknown                                                                  |
| K-325 | GK1418 | 1452378 | 1452542 | 6     | unknown                                                                  |
| K-326 | GK1420 | 1454494 | 1455384 | 4.6   | beta-alanine synthase                                                    |
| K-327 | GK1421 | 1455459 | 1456808 | 2.2   | glutamate synthase small subunit (EC 1.4.1.13)                           |
| K-328 | GK1422 | 1456828 | 1458117 | 2.3   | dihydropyrimidine dehydrogenase (EC 1.3.1.2)                             |
| K-329 | GK1424 | 1459631 | 1459861 | 6     | unknown                                                                  |
| K-330 | GK1426 | 1462081 | 1463547 | 2.1.1 | aldehyde dehydrogenase                                                   |
| K-331 | GK1428 | 1465178 | 1465747 | 5     | unknown conserved protein                                                |
| K-332 | GK1434 | 1475448 | 1476362 | 6     | unknown                                                                  |
| K-333 | GK1435 | 1476514 | 1478607 | 6     | unknown                                                                  |
| K-334 | GK1436 | 1478632 | 1479504 | 5     | unknown conserved protein                                                |
| K-335 | GK1439 | 1480972 | 1481187 | 6     | unknown                                                                  |
| K-336 | GK1440 | 1481282 | 1482718 | 2.1.3 | malic enzyme (EC 1.1.1.38)                                               |
| K-337 | GK1449 | 1491014 | 1491172 | 6     | unknown                                                                  |
| K-338 | GK1451 | 1491613 | 1492029 | 6     | unknown                                                                  |
| K-339 | GK1458 | 1499257 | 1499436 | 6     | unknown                                                                  |
| K-340 | GK1464 | 1505228 | 1505530 | 6     | unknown                                                                  |
| K-341 | GK1467 | 1507176 | 1507376 | 6     | unknown                                                                  |
| K-342 | GK1469 | 1509513 | 1510229 | 6     | unknown                                                                  |
| K-343 | GK1471 | 1511088 | 1511807 | 2.4   | 3-oxoacyl-[acyl-carrier-protein] reductase (EC 1.1.1.100)                |
| K-344 | GK1473 | 1512764 | 1513789 | 5     | unknown conserved protein                                                |
| K-345 | GK1474 | 1513847 | 1514041 | 2.4   | acyl carrier protein (ACP)                                               |

|       |        |         |         |       |                                                                                          |
|-------|--------|---------|---------|-------|------------------------------------------------------------------------------------------|
| K-346 | GK1475 | 1514038 | 1515525 | 5     | unknown conserved protein                                                                |
| K-347 | GK1476 | 1515546 | 1517120 | 6     | unknown                                                                                  |
| K-348 | GK1477 | 1517153 | 1517470 | 6     | unknown                                                                                  |
| K-349 | GK1479 | 1520345 | 1520677 | 3.5.2 | anti-sigmaB factor antagonist                                                            |
| K-350 | GK1481 | 1521482 | 1521781 | 6     | unknown                                                                                  |
| K-351 | GK1486 | 1526792 | 1527220 | 6     | unknown                                                                                  |
| K-352 | GK1488 | 1528350 | 1529123 | 5     | unknown conserved protein                                                                |
| K-353 | GK1489 | 1529126 | 1529914 | 5     | unknown conserved protein                                                                |
| K-354 | GK1492 | 1532224 | 1533906 | 5     | unknown conserved protein                                                                |
| K-355 | GK1496 | 1536178 | 1536612 | 6     | unknown                                                                                  |
| K-356 | GK1505 | 1543706 | 1545388 | 2.4   | long-chain-fatty-acid--CoA ligase (EC 6.2.1.-)                                           |
| K-357 | GK1513 | 1553140 | 1553301 | 6     | unknown                                                                                  |
| K-358 | GK1514 | 1553302 | 1553481 | 5     | unknown conserved protein                                                                |
| K-359 | GK1520 | 1557122 | 1559059 | 5     | unknown conserved protein                                                                |
| K-360 | GK1521 | 1559138 | 1559296 | 6     | unknown                                                                                  |
| K-361 | GK1522 | 1559377 | 1559733 | 6     | unknown                                                                                  |
| K-362 | GK1524 | 1560849 | 1561067 | 6     | unknown                                                                                  |
| K-363 | GK1528 | 1564577 | 1565374 | 2.1.1 | hydroxypyruvate isomerase (EC 5.3.1.22)                                                  |
| K-364 | GK1535 | 1574349 | 1575137 | 2.1.1 | 2-hydroxyhepta-2,4-diene-1,7-dioate isomerase                                            |
| K-365 | GK1539 | 1580063 | 1580197 | 6     | unknown                                                                                  |
| K-366 | GK1540 | 1580325 | 1580663 | 6     | unknown                                                                                  |
| K-367 | GK1542 | 1581647 | 1581784 | 6     | unknown                                                                                  |
| K-368 | GK1549 | 1589591 | 1589977 | 6     | unknown                                                                                  |
| K-369 | GK1557 | 1598503 | 1598655 | 6     | unknown                                                                                  |
| K-370 | GK1558 | 1598768 | 1599289 | 5     | unknown conserved protein                                                                |
| K-371 | GK1559 | 1599411 | 1599542 | 5     | unknown conserved protein                                                                |
| K-372 | GK1566 | 1601776 | 1601922 | 6     | unknown                                                                                  |
| K-373 | GK1576 | 1610124 | 1610288 | 6     | unknown                                                                                  |
| K-374 | GK1577 | 1610324 | 1610482 | 6     | unknown                                                                                  |
| K-375 | GK1578 | 1610609 | 1611016 | 6     | unknown                                                                                  |
| K-376 | GK1579 | 1611011 | 1611412 | 6     | unknown                                                                                  |
| K-377 | GK1584 | 1615141 | 1616097 | 5     | unknown conserved protein                                                                |
| K-378 | GK1586 | 1617639 | 1617737 | 5     | unknown conserved protein                                                                |
| K-379 | GK1587 | 1617771 | 1617911 | 5     | unknown conserved protein                                                                |
| K-380 | GK1592 | 1623878 | 1624219 | 6     | unknown                                                                                  |
| K-381 | GK1593 | 1624245 | 1624424 | 6     | unknown                                                                                  |
| K-382 | GK1595 | 1625625 | 1625885 | 6     | unknown                                                                                  |
| K-383 | GK1604 | 1634987 | 1635109 | 6     | unknown                                                                                  |
| K-384 | GK1611 | 1641004 | 1641183 | 6     | unknown                                                                                  |
| K-385 | GK1616 | 1645141 | 1646292 | 1.9   | spore germination protein                                                                |
| K-386 | GK1617 | 1646289 | 1647824 | 1.9   | spore germination protein                                                                |
| K-387 | GK1618 | 1647828 | 1648916 | 1.9   | spore germination protein                                                                |
| K-388 | GK1622 | 1650864 | 1652570 | 5     | unknown conserved protein                                                                |
| K-389 | GK1623 | 1652694 | 1652882 | 6     | unknown                                                                                  |
| K-390 | GK1628 | 1658647 | 1659069 | 5     | unknown conserved protein                                                                |
| K-391 | GK1629 | 1659163 | 1659588 | 1.8   | stage II sporulation protein AA                                                          |
| K-392 | GK1635 | 1666702 | 1667286 | 5     | unknown conserved protein                                                                |
| K-393 | GK1639 | 1670684 | 1670896 | 6     | unknown                                                                                  |
| K-394 | GK1641 | 1672139 | 1672438 | 6     | unknown                                                                                  |
| K-395 | GK1645 | 1675679 | 1676443 | 5     | unknown conserved protein                                                                |
| K-396 | GK1649 | 1679079 | 1679315 | 6     | unknown                                                                                  |
| K-397 | GK1650 | 1679200 | 1679388 | 6     | unknown                                                                                  |
| K-398 | GK1651 | 1679500 | 1680333 | 1.5   | pirin-like protein                                                                       |
| K-399 | GK1669 | 1695812 | 1696756 | 1.4   | cytochrome aa3 controlling protein                                                       |
| K-400 | GK1670 | 1696934 | 1697473 | 1.4   | b(o/a)3-type cytochrome c oxidase (EC 1.9.3.1) chain II                                  |
| K-401 | GK1671 | 1697757 | 1698920 | 1.4   | b(o/a)3-type cytochrome c oxidase (EC 1.9.3.1) chain I                                   |
| K-402 | GK1672 | 1698913 | 1699548 | 5     | unknown conserved protein                                                                |
| K-403 | GK1673 | 1699545 | 1700123 | 5     | unknown conserved protein                                                                |
| K-404 | GK1678 | 1705486 | 1706736 | 2.1.1 | cytoplasmic trehalase (alpha,alpha-trehalose glucohydrolase) (EC 3.2.1.28)               |
| K-405 | GK1679 | 1706680 | 1706958 | 6     | unknown                                                                                  |
| K-406 | GK1680 | 1706891 | 1707097 | 6     | unknown                                                                                  |
| K-407 | GK1681 | 1707251 | 1707517 | 6     | unknown                                                                                  |
| K-408 | GK1682 | 1707548 | 1707811 | 6     | unknown                                                                                  |
| K-409 | GK1684 | 1708941 | 1709711 | 2.4   | 3-oxoacyl-[acyl-carrier protein] reductase (3-ketoacyl-[acyl carrier protein] reductase) |
| K-410 | GK1687 | 1711510 | 1711707 | 6     | unknown                                                                                  |
| K-411 | GK1693 | 1717681 | 1717893 | 6     | unknown                                                                                  |
| K-412 | GK1695 | 1719504 | 1721162 | 4.5   | transposase                                                                              |
| K-413 | GK1699 | 1725393 | 1726028 | 5     | unknown conserved protein                                                                |
| K-414 | GK1700 | 1726131 | 1726709 | 5     | unknown conserved protein                                                                |

|       |        |         |         |     |                                                                                                          |
|-------|--------|---------|---------|-----|----------------------------------------------------------------------------------------------------------|
| K-415 | GK1701 | 1726791 | 1727273 | 6   | unknown                                                                                                  |
| K-416 | GK1703 | 1728528 | 1729328 | 5   | unknown conserved protein                                                                                |
| K-417 | GK1704 | 1729553 | 1730572 | 5   | unknown conserved protein                                                                                |
| K-418 | GK1705 | 1730715 | 1731278 | 5   | unknown conserved protein                                                                                |
| K-419 | GK1706 | 1731548 | 1731892 | 6   | unknown                                                                                                  |
| K-420 | GK1708 | 1732760 | 1734196 | 4.5 | transposase                                                                                              |
| K-421 | GK1709 | 1734439 | 1734762 | 6   | unknown                                                                                                  |
| K-422 | GK1711 | 1737643 | 1738086 | 6   | unknown                                                                                                  |
| K-423 | GK1713 | 1739924 | 1740568 | 6   | unknown                                                                                                  |
| K-424 | GK1718 | 1745182 | 1745889 | 5   | unknown conserved protein                                                                                |
| K-425 | GK1719 | 1746406 | 1746762 | 6   | unknown                                                                                                  |
| K-426 | GK1720 | 1746833 | 1748200 | 5   | unknown conserved protein                                                                                |
| K-427 | GK1721 | 1748429 | 1749307 | 4.5 | transposase                                                                                              |
| K-428 | GK1722 | 1749543 | 1749845 | 6   | unknown                                                                                                  |
| K-429 | GK1723 | 1750215 | 1750610 | 6   | unknown                                                                                                  |
| K-430 | GK1724 | 1750697 | 1750942 | 6   | unknown                                                                                                  |
| K-431 | GK1725 | 1751297 | 1752484 | 5   | unknown conserved protein                                                                                |
| K-432 | GK1728 | 1754872 | 1755111 | 6   | unknown                                                                                                  |
| K-433 | GK1729 | 1755143 | 1755316 | 6   | unknown                                                                                                  |
| K-434 | GK1730 | 1756212 | 1757117 | 4.4 | integrase:recombinase                                                                                    |
| K-435 | GK1731 | 1757523 | 1757717 | 5   | unknown conserved protein                                                                                |
| K-436 | GK1739 | 1765645 | 1765863 | 4.6 | sperm protamine P1                                                                                       |
| K-437 | GK1740 | 1765909 | 1766784 | 2.2 | spermidine synthase (putrescine aminopropyltransferase) (EC 2.5.1.16)                                    |
| K-438 | GK1742 | 1768165 | 1769664 | 2.2 | aminotransferase                                                                                         |
| K-439 | GK1748 | 1776537 | 1777268 | 6   | unknown                                                                                                  |
| K-440 | GK1749 | 1777373 | 1777717 | 5   | unknown conserved protein                                                                                |
| K-441 | GK1753 | 1783227 | 1783820 | 6   | unknown                                                                                                  |
| K-442 | GK1757 | 1789347 | 1789979 | 5   | unknown conserved protein                                                                                |
| K-443 | GK1761 | 1793513 | 1794730 | 2.2 | threonine synthase (EC 4.2.3.1)                                                                          |
| K-444 | GK1764 | 1798731 | 1798931 | 6   | unknown                                                                                                  |
| K-445 | GK1767 | 1800168 | 1801532 | 5   | unknown conserved protein                                                                                |
| K-446 | GK1777 | 1808586 | 1809290 | 5   | unknown conserved protein                                                                                |
| K-447 | GK1783 | 1814097 | 1814480 | 5   | unknown conserved protein                                                                                |
| K-448 | GK1788 | 1817969 | 1818067 | 5   | unknown conserved protein                                                                                |
| K-449 | GK1789 | 1817977 | 1818225 | 6   | unknown                                                                                                  |
| K-450 | GK1790 | 1818253 | 1818402 | 6   | unknown                                                                                                  |
| K-451 | GK1791 | 1818443 | 1818988 | 2.5 | cobalamin adenosyltransferase (EC 2.5.1.17)                                                              |
| K-452 | GK1792 | 1818969 | 1819739 | 2.5 | uroporphyrin-III C-methyltransferase (EC 2.1.1.107)                                                      |
| K-453 | GK1797 | 1823975 | 1825174 | 2.5 | cobalamin biosynthesis protein                                                                           |
| K-454 | GK1798 | 1825176 | 1825949 | 2.5 | precorrin-4 methylase (EC 2.1.1.133)                                                                     |
| K-455 | GK1799 | 1825946 | 1826647 | 2.5 | precorrin-2 methylase (EC 2.1.1.130)                                                                     |
| K-456 | GK1800 | 1826644 | 1827849 | 2.5 | precorrin-6Y C5,15-methyltransferase [decarboxylating] (EC 2.1.1.132)<br>(precorrin-6 methyltransferase) |
| K-457 | GK1801 | 1827815 | 1828933 | 2.5 | cobalamin biosynthesis protein                                                                           |
| K-458 | GK1802 | 1828940 | 1829587 | 2.5 | precorrin isomerase (EC 5.4.1.2)                                                                         |
| K-459 | GK1803 | 1829702 | 1830478 | 2.5 | precorrin-6x reductase                                                                                   |
| K-460 | GK1805 | 1831363 | 1833153 | 2.5 | precorrin-3B methylase (EC 2.1.1.131)                                                                    |
| K-461 | GK1806 | 1833215 | 1834003 | 1.2 | ABC transporter (ATP-binding protein) cobalt                                                             |
| K-462 | GK1807 | 1834009 | 1834734 | 1.2 | cobalt transporter system (permease)                                                                     |
| K-463 | GK1808 | 1834718 | 1835011 | 1.2 | cobalt transporter system (permease)                                                                     |
| K-464 | GK1809 | 1835016 | 1835759 | 2.5 | cobalamin biosynthesis protein                                                                           |
| K-465 | GK1811 | 1836595 | 1837128 | 6   | unknown                                                                                                  |
| K-466 | GK1812 | 1837118 | 1837357 | 6   | unknown                                                                                                  |
| K-467 | GK1818 | 1844109 | 1845953 | 2.2 | thimet oligopeptidase (EC 3.4.24.15)                                                                     |
| K-468 | GK1821 | 1848537 | 1848701 | 6   | unknown                                                                                                  |
| K-469 | GK1822 | 1848998 | 1849747 | 1.8 | stage III sporulation protein J                                                                          |
| K-470 | GK1823 | 1849792 | 1850058 | 6   | unknown                                                                                                  |
| K-471 | GK1830 | 1858098 | 1858346 | 6   | unknown                                                                                                  |
| K-472 | GK1842 | 1872780 | 1873376 | 5   | unknown conserved protein                                                                                |
| K-473 | GK1843 | 1873651 | 1873896 | 6   | unknown                                                                                                  |
| K-474 | GK1844 | 1873817 | 1873972 | 6   | unknown                                                                                                  |
| K-475 | GK1845 | 1874028 | 1874447 | 6   | unknown                                                                                                  |
| K-476 | GK1846 | 1874468 | 1874890 | 5   | unknown conserved protein                                                                                |
| K-477 | GK1847 | 1875399 | 1875545 | 5   | unknown conserved protein                                                                                |
| K-478 | GK1850 | 1877980 | 1878258 | 6   | unknown                                                                                                  |
| K-479 | GK1861 | 1887935 | 1888138 | 5   | unknown conserved protein                                                                                |
| K-480 | GK1870 | 1896797 | 1897198 | 5   | unknown conserved protein                                                                                |
| K-481 | GK1873 | 1900023 | 1900325 | 6   | unknown                                                                                                  |
| K-482 | GK1876 | 1903563 | 1905221 | 4.5 | transposase                                                                                              |
| K-483 | GK1879 | 1907602 | 1908801 | 1.2 | ABC transporter (permease) D-xylose                                                                      |

|       |        |         |         |       |                                                                      |
|-------|--------|---------|---------|-------|----------------------------------------------------------------------|
| K-484 | GK1880 | 1908780 | 1910294 | 1.2   | ABC transporter (ATP binding protein) D-xylose                       |
| K-485 | GK1881 | 1910407 | 1911498 | 1.2   | ABC transporter (substrate-binding protein) D-xylose                 |
| K-486 | GK1886 | 1916266 | 1917153 | 2.1.2 | fructose-1,6-bisphosphate aldolase (EC 4.1.2.13)                     |
| K-487 | GK1895 | 1927441 | 1927836 | 6     | unknown                                                              |
| K-488 | GK1899 | 1931279 | 1932283 | 2.1.1 | oxidoreductase                                                       |
| K-489 | GK1903 | 1938876 | 1940534 | 4.5   | transposase                                                          |
| K-490 | GK1915 | 1955839 | 1956390 | 5     | unknown conserved protein                                            |
| K-491 | GK1916 | 1956544 | 1957794 | 4.5   | transposase of <i>IS1604</i> -like element                           |
| K-492 | GK1917 | 1957787 | 1958587 | 5     | unknown conserved protein                                            |
| K-493 | GK1925 | 1967185 | 1967832 | 2.2   | urease accessory protein                                             |
| K-494 | GK1938 | 1977922 | 1979319 | 1.5   | methyl-accepting chemotaxis protein                                  |
| K-495 | GK1939 | 1979316 | 1979639 | 6     | unknown                                                              |
| K-496 | GK1943 | 1983917 | 1984150 | 6     | unknown                                                              |
| K-497 | GK1944 | 1984230 | 1985687 | 4.5   | transposase                                                          |
| K-498 | GK1949 | 1991666 | 1992001 | 5     | unknown conserved protein                                            |
| K-499 | GK1950 | 1992162 | 1992458 | 5     | unknown conserved protein                                            |
| K-500 | GK1960 | 2003401 | 2004357 | 5     | unknown conserved protein                                            |
| K-501 | GK1962 | 2005336 | 2005956 | 2.2   | urease accessory protein                                             |
| K-502 | GK1963 | 2005960 | 2007195 | 5     | unknown conserved protein                                            |
| K-503 | GK1964 | 2007192 | 2008001 | 5     | unknown conserved protein                                            |
| K-504 | GK1965 | 2007998 | 2008822 | 5     | unknown conserved protein                                            |
| K-505 | GK1967 | 2010416 | 2011315 | 5     | unknown conserved protein                                            |
| K-506 | GK1968 | 2011386 | 2012162 | 3.5.2 | transcriptional regulator                                            |
| K-507 | GK1969 | 2012270 | 2014471 | 2.2   | dihydroxy-acid dehydratase                                           |
| K-508 | GK1970 | 2014485 | 2015819 | 5     | unknown conserved protein                                            |
| K-509 | GK1974 | 2018867 | 2019895 | 1.2   | C4-dicarboxylate transport system (C4-dicarboxylate-binding protein) |
| K-510 | GK1985 | 2029384 | 2029596 | 6     | unknown                                                              |
| K-511 | GK1989 | 2034585 | 2036363 | 2.3   | adenine deaminase (EC 3.5.4.2)                                       |
| K-512 | GK1991 | 2036925 | 2038502 | 5     | unknown conserved protein                                            |
| K-513 | GK1992 | 2038625 | 2039422 | 2.4   | enoyl-CoA hydratase (EC 4.2.1.17)                                    |
| K-514 | GK1993 | 2039566 | 2040303 | 2.1.1 | phenylacetic acid catabolism protein                                 |
| K-515 | GK1994 | 2040443 | 2040769 | 5     | unknown conserved protein                                            |
| K-516 | GK1995 | 2040769 | 2041704 | 2.1.1 | phenylacetic acid catabolism protein                                 |
| K-517 | GK1997 | 2043061 | 2043936 | 2.1.1 | repressor in the phenylacetic acid catabolism                        |
| K-518 | GK1998 | 2043943 | 2044107 | 6     | unknown                                                              |
| K-519 | GK1999 | 2044064 | 2044189 | 6     | unknown                                                              |
| K-520 | GK2001 | 2046602 | 2046919 | 6     | unknown                                                              |
| K-521 | GK2006 | 2051152 | 2052348 | 5     | unknown conserved protein                                            |
| K-522 | GK2007 | 2052078 | 2052254 | 6     | unknown                                                              |
| K-523 | GK2008 | 2052524 | 2053318 | 1.2   | ABC transporter (permease) polyamine                                 |
| K-524 | GK2011 | 2055331 | 2056437 | 1.2   | ABC transporter (substrate-binding protein)                          |
| K-525 | GK2012 | 2056776 | 2058131 | 4.5   | transposase                                                          |
| K-526 | GK2015 | 2061279 | 2062007 | 3.5.2 | transcriptional regulator                                            |
| K-527 | GK2019 | 2066566 | 2066832 | 6     | unknown                                                              |
| K-528 | GK2023 | 2070039 | 2070347 | 6     | unknown                                                              |
| K-529 | GK2024 | 2070445 | 2071209 | 2.1.2 | pyruvate dehydrogenase E1 (lipoamide) (EC 1.2.4.1) beta subunit      |
| K-530 | GK2026 | 2072708 | 2073028 | 6     | unknown                                                              |
| K-531 | GK2028 | 2074114 | 2074917 | 1.2   | ABC transporter (ATP-binding protein)                                |
| K-532 | GK2029 | 2074883 | 2075875 | 1.2   | ABC transporter (permease)                                           |
| K-533 | GK2030 | 2075890 | 2076903 | 1.2   | ABC transporter (substrate-binding protein)                          |
| K-534 | GK2033 | 2079460 | 2079660 | 6     | unknown                                                              |
| K-535 | GK2047 | 2093060 | 2093209 | 6     | unknown                                                              |
| K-536 | GK2050 | 2095654 | 2095887 | 6     | unknown                                                              |
| K-537 | GK2055 | 2101473 | 2101796 | 6     | unknown                                                              |
| K-538 | GK2058 | 2103418 | 2103588 | 6     | unknown                                                              |
| K-539 | GK2060 | 2105540 | 2105959 | 6     | unknown                                                              |
| K-540 | GK2063 | 2107854 | 2108240 | 5     | unknown conserved protein                                            |
| K-541 | GK2065 | 2109245 | 2110381 | 5     | unknown conserved protein                                            |
| K-542 | GK2072 | 2112810 | 2113205 | 6     | unknown                                                              |
| K-543 | GK2075 | 2115631 | 2115876 | 4.2   | glutaredoxin                                                         |
| K-544 | GK2076 | 2115902 | 2116291 | 5     | unknown conserved protein                                            |
| K-545 | GK2078 | 2118228 | 2118596 | 5     | unknown conserved protein                                            |
| K-546 | GK2085 | 2125511 | 2126698 | 5     | unknown conserved protein                                            |
| K-547 | GK2086 | 2127052 | 2127681 | 3.5.2 | two component response regulator                                     |
| K-548 | GK2087 | 2127659 | 2128681 | 1.3   | two-component sensor histidine kinase                                |
| K-549 | GK2089 | 2130176 | 2130715 | 6     | unknown                                                              |
| K-550 | GK2092 | 2134062 | 2134376 | 5     | unknown conserved protein                                            |
| K-551 | GK2093 | 2134591 | 2134869 | 6     | unknown                                                              |
| K-552 | GK2094 | 2135720 | 2135974 | 6     | unknown                                                              |
| K-553 | GK2102 | 2143645 | 2144808 | 2.2   | tryptophan synthase beta chain (EC 4.2.1.20)                         |

|       |        |         |         |     |                                                                      |
|-------|--------|---------|---------|-----|----------------------------------------------------------------------|
| K-554 | GK2106 | 2149278 | 2149637 | 5   | unknown conserved protein                                            |
| K-555 | GK2109 | 2151453 | 2151803 | 6   | unknown                                                              |
| K-556 | GK2110 | 2151955 | 2152293 | 5   | unknown conserved protein                                            |
| K-557 | GK2116 | 2158433 | 2158789 | 6   | unknown                                                              |
| K-558 | GK2119 | 2160648 | 2160815 | 6   | unknown                                                              |
| K-559 | GK2126 | 2167059 | 2167637 | 5   | unknown conserved protein                                            |
| K-560 | GK2127 | 2167782 | 2168243 | 5   | unknown conserved protein                                            |
| K-561 | GK2130 | 2170385 | 2170522 | 6   | unknown                                                              |
| K-562 | GK2135 | 2173024 | 2174571 | 2.4 | methylmalonyl-CoA decarboxylase (EC 4.1.1.41)                        |
| K-563 | GK2136 | 2174630 | 2176285 | 2.4 | long-chain-fatty-acid--CoA ligase                                    |
| K-564 | GK2139 | 2179116 | 2180552 | 1.2 | sodium:proline symporter (osmoregulation)                            |
| K-565 | GK2142 | 2185266 | 2185550 | 6   | unknown                                                              |
| K-566 | GK2143 | 2186168 | 2186743 | 6   | unknown                                                              |
| K-567 | GK2144 | 2192353 | 2192973 | 6   | unknown                                                              |
| K-568 | GK2145 | 2193054 | 2193344 | 5   | unknown conserved protein                                            |
| K-569 | GK2155 | 2204374 | 2204529 | 6   | unknown                                                              |
| K-570 | GK2158 | 2206786 | 2206908 | 6   | unknown                                                              |
| K-571 | GK2160 | 2207969 | 2208154 | 6   | unknown                                                              |
| K-572 | GK2164 | 2209421 | 2209615 | 6   | unknown                                                              |
| K-573 | GK2166 | 2210197 | 2210424 | 6   | unknown                                                              |
| K-574 | GK2175 | 2219113 | 2219301 | 6   | unknown                                                              |
| K-575 | GK2216 | 2256030 | 2256380 | 6   | unknown                                                              |
| K-576 | GK2237 | 2275627 | 2276241 | 6   | unknown                                                              |
| K-577 | GK2249 | 2285560 | 2285646 | 6   | unknown                                                              |
| K-578 | GK2256 | 2291482 | 2291970 | 5   | unknown conserved protein                                            |
| K-579 | GK2267 | 2301297 | 2302175 | 4.5 | transposase                                                          |
| K-580 | GK2269 | 2302794 | 2304158 | 1.2 | amino acid transporter                                               |
| K-581 | GK2271 | 2305159 | 2306448 | 6   | unknown                                                              |
| K-582 | GK2273 | 2307153 | 2307905 | 5   | unknown conserved protein                                            |
| K-583 | GK2274 | 2308498 | 2308827 | 6   | unknown                                                              |
| K-584 | GK2287 | 2320916 | 2321167 | 6   | unknown                                                              |
| K-585 | GK2303 | 2335367 | 2335717 | 1.8 | sporulation protein                                                  |
| K-586 | GK2305 | 2336804 | 2337232 | 1.8 | stage V sporulation AC                                               |
| K-587 | GK2323 | 2352022 | 2352264 | 5   | unknown conserved protein                                            |
| K-588 | GK2324 | 2352345 | 2352464 | 6   | unknown                                                              |
| K-589 | GK2328 | 2353447 | 2353644 | 5   | unknown conserved protein                                            |
| K-590 | GK2336 | 2361651 | 2361920 | 5   | unknown conserved protein                                            |
| K-591 | GK2339 | 2365024 | 2366835 | 6   | unknown                                                              |
| K-592 | GK2345 | 2373362 | 2373556 | 6   | unknown                                                              |
| K-593 | GK2346 | 2373638 | 2374132 | 1.5 | chemotaxis protein                                                   |
| K-594 | GK2348 | 2375590 | 2375841 | 6   | unknown                                                              |
| K-595 | GK2351 | 2377943 | 2378155 | 6   | unknown                                                              |
| K-596 | GK2354 | 2379882 | 2380145 | 5   | unknown conserved protein                                            |
| K-597 | GK2355 | 2380207 | 2380575 | 5   | unknown conserved protein                                            |
| K-598 | GK2356 | 2381774 | 2383135 | 6   | unknown                                                              |
| K-599 | GK2357 | 2383247 | 2385115 | 6   | unknown                                                              |
| K-600 | GK2358 | 2385115 | 2385501 | 6   | unknown                                                              |
| K-601 | GK2360 | 2387093 | 2389144 | 6   | unknown                                                              |
| K-602 | GK2361 | 2389141 | 2390010 | 1.2 | ABC transporter (ATP-binding protein)                                |
| K-603 | GK2362 | 2390007 | 2390666 | 5   | unknown conserved protein                                            |
| K-604 | GK2363 | 2391020 | 2393041 | 6   | unknown                                                              |
| K-605 | GK2364 | 2393025 | 2393891 | 1.2 | ABC transporter (ATP-binding protein)                                |
| K-606 | GK2365 | 2393884 | 2394516 | 6   | unknown                                                              |
| K-607 | GK2366 | 2394811 | 2394933 | 6   | unknown                                                              |
| K-608 | GK2367 | 2395038 | 2395784 | 5   | unknown conserved protein                                            |
| K-609 | GK2372 | 2402285 | 2402869 | 5   | unknown conserved protein                                            |
| K-610 | GK2417 | 2444344 | 2444742 | 6   | unknown                                                              |
| K-611 | GK2418 | 2444782 | 2446194 | 1.8 | spore peptidoglycan hydrolase (N-acetylglucosaminidase) (EC 3.2.1.-) |
| K-612 | GK2429 | 2459337 | 2459726 | 6   | unknown                                                              |
| K-613 | GK2431 | 2460226 | 2460552 | 5   | unknown conserved protein                                            |
| K-614 | GK2447 | 2473856 | 2474035 | 6   | unknown                                                              |
| K-615 | GK2451 | 2475899 | 2477263 | 5   | unknown conserved protein                                            |
| K-616 | GK2458 | 2484045 | 2484554 | 6   | unknown                                                              |
| K-617 | GK2459 | 2484518 | 2484895 | 6   | unknown                                                              |
| K-618 | GK2464 | 2488656 | 2488883 | 6   | unknown                                                              |
| K-619 | GK2481 | 2501652 | 2501960 | 6   | unknown                                                              |
| K-620 | GK2536 | 2552246 | 2552332 | 6   | unknown                                                              |
| K-621 | GK2537 | 2552366 | 2552602 | 6   | unknown                                                              |
| K-622 | GK2538 | 2552565 | 2552708 | 6   | unknown                                                              |
| K-623 | GK2539 | 2553084 | 2553332 | 5   | unknown conserved protein                                            |

|       |        |         |         |       |                                                                |
|-------|--------|---------|---------|-------|----------------------------------------------------------------|
| K-624 | GK2558 | 2571218 | 2571373 | 6     | unknown                                                        |
| K-625 | GK2589 | 2606225 | 2606563 | 6     | unknown                                                        |
| K-626 | GK2597 | 2611745 | 2612689 | 6     | unknown                                                        |
| K-627 | GK2621 | 2633784 | 2634245 | 6     | unknown                                                        |
| K-628 | GK2622 | 2634267 | 2634974 | 6     | unknown                                                        |
| K-629 | GK2623 | 2634971 | 2635546 | 6     | unknown                                                        |
| K-630 | GK2626 | 2637263 | 2637724 | 5     | unknown conserved protein                                      |
| K-631 | GK2627 | 2637820 | 2639031 | 5     | unknown conserved protein                                      |
| K-632 | GK2628 | 2639018 | 2640073 | 1.5   | switching motility protein                                     |
| K-633 | GK2629 | 2640086 | 2641750 | 1.5   | ATPases involved in pili biogenesis                            |
| K-634 | GK2630 | 2641747 | 2643087 | 6     | unknown                                                        |
| K-635 | GK2631 | 2643105 | 2643875 | 5     | unknown conserved protein                                      |
| K-636 | GK2632 | 2643886 | 2645337 | 6     | unknown                                                        |
| K-637 | GK2633 | 2645453 | 2646085 | 6     | unknown                                                        |
| K-638 | GK2634 | 2646069 | 2646638 | 6     | unknown                                                        |
| K-639 | GK2635 | 2646678 | 2648372 | 6     | unknown                                                        |
| K-640 | GK2636 | 2648439 | 2651321 | 6     | unknown                                                        |
| K-641 | GK2648 | 2664828 | 2665313 | 5     | unknown conserved protein                                      |
| K-642 | GK2663 | 2684155 | 2685603 | 4.5   | transposase                                                    |
| K-643 | GK2676 | 2696967 | 2698412 | 6     | unknown                                                        |
| K-644 | GK2678 | 2699412 | 2700173 | 6     | unknown                                                        |
| K-645 | GK2681 | 2702731 | 2703729 | 6     | unknown                                                        |
| K-646 | GK2683 | 2704638 | 2704781 | 6     | unknown                                                        |
| K-647 | GK2684 | 2704905 | 2706083 | 6     | unknown                                                        |
| K-648 | GK2691 | 2711902 | 2712066 | 6     | unknown                                                        |
| K-649 | GK2711 | 2734291 | 2735034 | 5     | unknown conserved protein                                      |
| K-650 | GK2729 | 2749311 | 2749433 | 6     | unknown                                                        |
| K-651 | GK2754 | 2777991 | 2778131 | 6     | unknown                                                        |
| K-652 | GK2759 | 2782274 | 2783932 | 2.1.1 | acetyl-CoA synthetase (acetate-CoA ligase) (EC 6.2.1.1)        |
| K-653 | GK2760 | 2783976 | 2785082 | 6     | unknown                                                        |
| K-654 | GK2765 | 2790094 | 2790261 | 6     | unknown                                                        |
| K-655 | GK2767 | 2791236 | 2792738 | 6     | unknown                                                        |
| K-656 | GK2768 | 2792943 | 2794091 | 6     | unknown                                                        |
| K-657 | GK2769 | 2794214 | 2795323 | 5     | unknown conserved protein                                      |
| K-658 | GK2770 | 2795463 | 2796068 | 5     | unknown conserved protein                                      |
| K-659 | GK2771 | 2796294 | 2797202 | 2.3   | ribonucleotide reductase small subunit (EC 1.17.4.1)           |
| K-660 | GK2773 | 2798863 | 2799414 | 6     | unknown                                                        |
| K-661 | GK2775 | 2800598 | 2800924 | 6     | unknown                                                        |
| K-662 | GK2776 | 2800941 | 2802686 | 1.2   | ABC1 family protein kinase                                     |
| K-663 | GK2777 | 2802707 | 2803849 | 2.4   | acetyl-CoA acetyltransferases                                  |
| K-664 | GK2778 | 2803964 | 2804806 | 2.4   | 3-ketoacyl-[acyl carrier protein] reductase                    |
| K-665 | GK2779 | 2804822 | 2805613 | 2.4   | enoyl-CoA hydratase/carnithine racemase                        |
| K-666 | GK2780 | 2805711 | 2806925 | 2.4   | acyl-CoA dehydrogenase                                         |
| K-667 | GK2781 | 2806922 | 2808064 | 2.4   | acyl-CoA dehydrogenase                                         |
| K-668 | GK2782 | 2808085 | 2809620 | 2.4   | long-chain-fatty-acid--CoA ligase (fadD-9) (EC 6.2.1.-)        |
| K-669 | GK2784 | 2810243 | 2810755 | 6     | unknown                                                        |
| K-670 | GK2797 | 2822666 | 2822848 | 6     | unknown                                                        |
| K-671 | GK2804 | 2830318 | 2830578 | 5     | unknown conserved protein                                      |
| K-672 | GK2813 | 2841252 | 2841647 | 5     | unknown conserved protein                                      |
| K-673 | GK2826 | 2852951 | 2853106 | 6     | unknown                                                        |
| K-674 | GK2834 | 2861125 | 2861337 | 6     | unknown                                                        |
| K-675 | GK2840 | 2866767 | 2866913 | 6     | unknown                                                        |
| K-676 | GK2852 | 2880543 | 2881445 | 5     | unknown conserved protein                                      |
| K-677 | GK2862 | 2888231 | 2888491 | 5     | unknown conserved protein                                      |
| K-678 | GK2867 | 2892811 | 2894889 | 6     | unknown                                                        |
| K-679 | GK2868 | 2895038 | 2895523 | 6     | unknown                                                        |
| K-680 | GK2871 | 2896391 | 2896588 | 6     | unknown                                                        |
| K-681 | GK2881 | 2907833 | 2908783 | 1.2   | cation efflux transporter                                      |
| K-682 | GK2883 | 2909744 | 2909935 | 6     | unknown                                                        |
| K-683 | GK2887 | 2912427 | 2912777 | 6     | unknown                                                        |
| K-684 | GK2888 | 2912937 | 2913230 | 6     | unknown                                                        |
| K-685 | GK2890 | 2914877 | 2915215 | 6     | unknown                                                        |
| K-686 | GK2891 | 2915273 | 2915428 | 6     | unknown                                                        |
| K-687 | GK2892 | 2915497 | 2915832 | 5     | unknown conserved protein                                      |
| K-688 | GK2893 | 2915852 | 2917588 | 2.2   | N-methylhydantoinase B (ATP-hydrolyzing) (EC 3.5.2.14)         |
| K-689 | GK2897 | 2921800 | 2922549 | 2.2   | hydantoin racemase (EC 5.1.99.-)                               |
| K-690 | GK2900 | 2925453 | 2926451 | 1.2   | ABC transporter (permease) ferrichrome                         |
| K-691 | GK2901 | 2926482 | 2927423 | 1.2   | ABC transporter (substrate-binding protein) ferrichrome        |
| K-692 | GK2905 | 2931510 | 2932826 | 3.2   | type I restriction-modification system specificity determinant |
| K-693 | GK2906 | 2932826 | 2933944 | 6     | unknown                                                        |

|       |        |         |         |       |                                                 |
|-------|--------|---------|---------|-------|-------------------------------------------------|
| K-694 | GK2907 | 2934024 | 2934902 | 4.5   | transposase                                     |
| K-695 | GK2908 | 2935016 | 2935360 | 6     | unknown                                         |
| K-696 | GK2909 | 2935710 | 2936687 | 6     | unknown                                         |
| K-697 | GK2910 | 2936764 | 2936961 | 6     | unknown                                         |
| K-698 | GK2911 | 2936987 | 2938150 | 4.5   | transposase of <i>IS1604</i> -like element      |
| K-699 | GK2912 | 2938293 | 2938856 | 5     | unknown conserved protein                       |
| K-700 | GK2913 | 2939310 | 2940323 | 4.4   | integrase-recombinase                           |
| K-701 | GK2919 | 2953901 | 2954152 | 6     | unknown                                         |
| K-702 | GK2921 | 2955030 | 2955383 | 6     | unknown                                         |
| K-703 | GK2935 | 2967188 | 2967625 | 6     | unknown                                         |
| K-704 | GK2938 | 2969550 | 2969726 | 6     | unknown                                         |
| K-705 | GK2939 | 2970340 | 2970522 | 6     | unknown                                         |
| K-706 | GK2940 | 2970668 | 2971198 | 6     | unknown                                         |
| K-707 | GK2941 | 2971284 | 2971583 | 6     | unknown                                         |
| K-708 | GK2942 | 2971646 | 2972833 | 5     | unknown conserved protein                       |
| K-709 | GK2943 | 2973664 | 2973822 | 6     | unknown                                         |
| K-710 | GK2955 | 2983989 | 2984291 | 5     | unknown conserved protein                       |
| K-711 | GK2987 | 3011031 | 3011984 | 6     | unknown                                         |
| K-712 | GK2988 | 3011991 | 3012386 | 6     | unknown                                         |
| K-713 | GK2989 | 3012735 | 3014396 | 4.5   | transposase                                     |
| K-714 | GK2990 | 3015127 | 3015558 | 6     | unknown                                         |
| K-715 | GK3013 | 3036056 | 3036190 | 5     | unknown conserved protein                       |
| K-716 | GK3014 | 3036289 | 3036483 | 5     | unknown conserved protein                       |
| K-717 | GK3015 | 3036458 | 3036610 | 6     | unknown                                         |
| K-718 | GK3018 | 3038803 | 3039366 | 2.5   | protein involved in biotin synthesis            |
| K-719 | GK3019 | 3039544 | 3041526 | 5     | unknown conserved protein                       |
| K-720 | GK3020 | 3041785 | 3042348 | 5     | unknown conserved protein                       |
| K-721 | GK3039 | 3059991 | 3061166 | 6     | unknown                                         |
| K-722 | GK3040 | 3061394 | 3061984 | 5     | unknown conserved protein                       |
| K-723 | GK3041 | 3062006 | 3062431 | 5     | unknown conserved protein                       |
| K-724 | GK3042 | 3062558 | 3062707 | 6     | unknown                                         |
| K-725 | GK3047 | 3068246 | 3068437 | 6     | unknown                                         |
| K-726 | GK3048 | 3068594 | 3068809 | 6     | unknown                                         |
| K-727 | GK3050 | 3070470 | 3070646 | 6     | unknown                                         |
| K-728 | GK3051 | 3070715 | 3071782 | 6     | unknown                                         |
| K-729 | GK3052 | 3071822 | 3071992 | 6     | unknown                                         |
| K-730 | GK3093 | 3116266 | 3116520 | 6     | unknown                                         |
| K-731 | GK3096 | 3118950 | 3120590 | 4.2   | mercuric reductase (EC 1.16.1.1)                |
| K-732 | GK3097 | 3120648 | 3120941 | 1.2   | transporter                                     |
| K-733 | GK3104 | 3126893 | 3127153 | 5     | unknown conserved protein in <i>Tn5401</i>      |
| K-734 | GK3105 | 3127122 | 3127382 | 5     | unknown conserved protein in <i>Tn5401</i>      |
| K-735 | GK3108 | 3131311 | 3131931 | 6     | unknown                                         |
| K-736 | GK3111 | 3133965 | 3134351 | 6     | unknown                                         |
| K-737 | GK3116 | 3137605 | 3139227 | 4.5   | transposase                                     |
| K-738 | GK3118 | 3140643 | 3141494 | 6     | unknown                                         |
| K-739 | GK3119 | 3141775 | 3142302 | 6     | unknown                                         |
| K-740 | GK3120 | 3142574 | 3143275 | 2.1.1 | acylneuramate cytidyltransferase (EC 2.7.7.43)  |
| K-741 | GK3121 | 3143272 | 3144321 | 2.1.1 | nucleoside-diphosphate-sugar pyrophosphorylases |
| K-742 | GK3124 | 3146023 | 3146682 | 5     | unknown conserved protein                       |
| K-743 | GK3125 | 3146679 | 3147578 | 3.7.3 | methionyl-tRNA formyltransferase (EC 2.1.2.9)   |
| K-744 | GK3126 | 3147575 | 3148747 | 2.1.1 | UDP-N-acetylglucosamine-2-epimerase (5.1.3.-)   |
| K-745 | GK3129 | 3151046 | 3152944 | 5     | unknown conserved protein                       |
| K-746 | GK3130 | 3152934 | 3153542 | 6     | unknown                                         |
| K-747 | GK3132 | 3154700 | 3154885 | 6     | unknown                                         |
| K-748 | GK3145 | 3163193 | 3166240 | 6     | unknown                                         |
| K-749 | GK3148 | 3168741 | 3168956 | 6     | unknown                                         |
| K-750 | GK3158 | 3180425 | 3180691 | 6     | unknown                                         |
| K-751 | GK3160 | 3181767 | 3182879 | 6     | unknown                                         |
| K-752 | GK3161 | 3182883 | 3184271 | 6     | unknown                                         |
| K-753 | GK3163 | 3185375 | 3186823 | 1.1   | protein involved in polysaccharide biosynthesis |
| K-754 | GK3164 | 3186825 | 3187556 | 2.1.1 | acetyltransferases                              |
| K-755 | GK3166 | 3188903 | 3189916 | 5     | unknown conserved protein                       |
| K-756 | GK3167 | 3189913 | 3190650 | 6     | unknown                                         |
| K-757 | GK3172 | 3196971 | 3198377 | 2.2   | carboxyl-terminal processing protease           |
| K-758 | GK3173 | 3198409 | 3199149 | 6     | unknown                                         |
| K-759 | GK3174 | 3199313 | 3199714 | 6     | unknown                                         |
| K-760 | GK3178 | 3204484 | 3205395 | 5     | unknown conserved protein                       |
| K-761 | GK3179 | 3205395 | 3206003 | 5     | unknown conserved protein                       |
| K-762 | GK3183 | 3216317 | 3217213 | 6     | unknown                                         |
| K-763 | GK3184 | 3217210 | 3218004 | 5     | unknown conserved protein                       |

|       |        |         |         |       |                                                                  |
|-------|--------|---------|---------|-------|------------------------------------------------------------------|
| K-764 | GK3185 | 3218009 | 3218401 | 6     | unknown                                                          |
| K-765 | GK3186 | 3219062 | 3221971 | 1.1   | surface layer (S-layer) glycoprotein                             |
| K-766 | GK3189 | 3224707 | 3225216 | 6     | unknown                                                          |
| K-767 | GK3194 | 3227715 | 3228614 | 5     | unknown conserved protein                                        |
| K-768 | GK3196 | 3230640 | 3231074 | 1.4   | iron-sulfur binding protein                                      |
| K-769 | GK3197 | 3231471 | 3232055 | 6     | unknown                                                          |
| K-770 | GK3200 | 3234394 | 3234579 | 6     | unknown                                                          |
| K-771 | GK3203 | 3237101 | 3237241 | 6     | unknown                                                          |
| K-772 | GK3211 | 3246337 | 3247215 | 5     | unknown conserved protein                                        |
| K-773 | GK3216 | 3252945 | 3253922 | 2.1.2 | pyruvate dehydrogenase E1 (lipoamide) beta subunit (EC 1.2.4.1)  |
| K-774 | GK3217 | 3253923 | 3255002 | 2.1.2 | pyruvate dehydrogenase E1 (lipoamide) alpha subunit (EC 1.2.4.1) |
| K-775 | GK3223 | 3259583 | 3260647 | 1.2   | arsenic oxyanion-translocation pump                              |
| K-776 | GK3232 | 3268055 | 3268171 | 6     | unknown                                                          |
| K-777 | GK3234 | 3269050 | 3269220 | 6     | unknown                                                          |
| K-778 | GK3235 | 3269227 | 3269949 | 6     | unknown                                                          |
| K-779 | GK3236 | 3270832 | 3272160 | 4.5   | transposase                                                      |
| K-780 | GK3237 | 3272717 | 3273199 | 6     | unknown                                                          |
| K-781 | GK3239 | 3275419 | 3277077 | 4.5   | transposase                                                      |
| K-782 | GK3243 | 3279169 | 3279486 | 6     | unknown                                                          |
| K-783 | GK3244 | 3279689 | 3279904 | 6     | unknown                                                          |
| K-784 | GK3249 | 3285674 | 3285778 | 5     | unknown conserved protein                                        |
| K-785 | GK3250 | 3286456 | 3286704 | 6     | unknown                                                          |
| K-786 | GK3257 | 3295134 | 3295844 | 5     | unknown conserved protein                                        |
| K-787 | GK3263 | 3306183 | 3306299 | 6     | unknown                                                          |
| K-788 | GK3264 | 3306868 | 3307839 | 5     | unknown conserved protein                                        |
| K-789 | GK3266 | 3308609 | 3308986 | 5     | unknown conserved protein                                        |
| K-790 | GK3267 | 3309008 | 3309439 | 6     | unknown                                                          |
| K-791 | GK3268 | 3309442 | 3310755 | 6     | unknown                                                          |
| K-792 | GK3271 | 3313028 | 3313975 | 5     | unknown conserved protein                                        |
| K-793 | GK3272 | 3314017 | 3314847 | 1.2   | ABC transporter (permease) sugar                                 |
| K-794 | GK3273 | 3314834 | 3315712 | 1.2   | ABC transporter (permease) sugar                                 |
| K-795 | GK3275 | 3317534 | 3318547 | 3.5.2 | transcriptional regulator (lacI family)                          |
| K-796 | GK3276 | 3318587 | 3319480 | 5     | unknown conserved protein                                        |
| K-797 | GK3278 | 3320909 | 3321382 | 6     | unknown                                                          |
| K-798 | GK3279 | 3321426 | 3321626 | 6     | unknown                                                          |
| K-799 | GK3281 | 3322528 | 3323598 | 5     | unknown conserved protein                                        |
| K-800 | GK3282 | 3323742 | 3324341 | 6     | unknown                                                          |
| K-801 | GK3285 | 3327240 | 3327497 | 5     | unknown conserved protein                                        |
| K-802 | GK3286 | 3327466 | 3327861 | 6     | unknown                                                          |
| K-803 | GK3287 | 3328422 | 3328898 | 5     | unknown conserved protein                                        |
| K-804 | GK3288 | 3328904 | 3330430 | 5     | unknown conserved protein                                        |
| K-805 | GK3290 | 3331065 | 3331220 | 6     | unknown                                                          |
| K-806 | GK3291 | 3331374 | 3332120 | 5     | unknown conserved protein                                        |
| K-807 | GK3292 | 3332122 | 3332721 | 5     | unknown conserved protein                                        |
| K-808 | GK3293 | 3333143 | 3334576 | 6     | unknown                                                          |
| K-809 | GK3294 | 3334788 | 3336410 | 5     | unknown conserved protein                                        |
| K-810 | GK3295 | 3336639 | 3336998 | 6     | unknown                                                          |
| K-811 | GK3296 | 3337239 | 3338210 | 2.1.1 | UDP-glucose 4-epimerase (EC 5.1.3.2)                             |
| K-812 | GK3302 | 3345899 | 3347557 | 4.5   | transposase                                                      |
| K-813 | GK3303 | 3347712 | 3349331 | 4.5   | transposase                                                      |
| K-814 | GK3305 | 3351040 | 3351216 | 6     | unknown                                                          |
| K-815 | GK3308 | 3352575 | 3353708 | 2.1.1 | mannosyl transferase                                             |
| K-816 | GK3309 | 3353705 | 3354211 | 2.2   | serine acetyltransferase (EC 2.3.1.30)                           |
| K-817 | GK3310 | 3354622 | 3355500 | 4.5   | transposase                                                      |
| K-818 | GK3312 | 3357579 | 3359024 | 4.5   | transposase of <i>ISBstI2</i>                                    |
| K-819 | GK3315 | 3361487 | 3362377 | 2.1.1 | glycosyltransferase                                              |
| K-820 | GK3316 | 3362398 | 3363546 | 1.1   | UDP-galactopyranose mutase (EC 5.4.99.9)                         |
| K-821 | GK3318 | 3364877 | 3365062 | 6     | unknown                                                          |
| K-822 | GK3321 | 3367245 | 3367925 | 5     | unknown conserved protein                                        |
| K-823 | GK3322 | 3367930 | 3368526 | 6     | unknown                                                          |
| K-824 | GK3328 | 3373378 | 3373746 | 6     | unknown                                                          |
| K-825 | GK3344 | 3387653 | 3387898 | 6     | unknown                                                          |
| K-826 | GK3351 | 3394175 | 3394273 | 6     | unknown                                                          |
| K-827 | GK3367 | 3406576 | 3406773 | 5     | unknown conserved protein                                        |
| K-828 | GK3379 | 3417996 | 3418436 | 6     | unknown                                                          |
| K-829 | GK3396 | 3437695 | 3437886 | 6     | unknown                                                          |
| K-830 | GK3403 | 3445697 | 3446074 | 5     | unknown conserved protein                                        |
| K-831 | GK3426 | 3466115 | 3466633 | 5     | unknown conserved protein                                        |
| K-832 | GK3427 | 3467068 | 3467301 | 6     | unknown                                                          |
| K-833 | GK3429 | 3468284 | 3468433 | 6     | unknown                                                          |

|       |        |         |         |     |                           |
|-------|--------|---------|---------|-----|---------------------------|
| K-834 | GK3431 | 3470444 | 3471808 | 5   | unknown conserved protein |
| K-835 | GK3434 | 3474215 | 3474532 | 6   | unknown                   |
| K-836 | GK3435 | 3474927 | 3476684 | 6   | unknown                   |
| K-837 | GK3449 | 3491982 | 3492548 | 5   | unknown conserved protein |
| K-838 | GK3460 | 3503101 | 3503844 | 3.6 | rRNA methylase            |
| K-839 | GK3462 | 3505613 | 3506992 | 6   | unknown                   |

---
